# Supplementary material for: Impact of counteranions on N-heterocyclic carbene gold(i)-catalyzed cyclization of propargylic amide
Source: Royal Society of Chemistry journal article supplement (doi:10.1039/d2ra06210k), 2023-01-01
Supplement: d2ra06210k1.pdf [file d2ra06210k1.pdf]

**Electronic Supporting Information**

**For**

**Impact of Counteranions on N-Heterocyclic Carbene Gold(I)-  
Catalyzed Cyclization of Propargylic Amide**

Hafiz Saqib Ali<sup>a</sup> and Aqeel A. Hussein<sup>b,\*</sup> and Mohammed Obies<sup>c</sup>

<sup>a</sup> Chemistry Research Laboratory, Department of Chemistry and the Ineos Oxford Institute for Antimicrobial Research, University of Oxford, 12 Mansfield Road, Oxford OX1 3TA, UK.

<sup>b</sup> Department of Medical Laboratory Science, College of Science, Komar University of Science and Technology, 46001 Sulaymaniyah, Kurdistan Region/Iraq; Email: aqeel.alaa@komar.edu.iq

<sup>c</sup> College of Pharmacy, University of Babylon, 51002, Hillah, Babylon, Iraq.

**Table ESII.** Computed relative basicity of different counteranions and their effect on relative affinity of Au(I) property among complexation to propargylic amide (in kcal/mol).<sup>a</sup>

| Anion                         | Basicity | Au affinity |
|-------------------------------|----------|-------------|
| NTf <sub>2</sub> <sup>-</sup> | 160.8    | 49.9        |
| ClO <sub>4</sub> <sup>-</sup> | 155.9    | 41.0        |
| TsO <sup>-</sup>              | 173.1    | 46.3        |
| TFA <sup>-</sup>              | 179.3    | 55.7        |
| TfO <sup>-</sup>              | 157.5    | 40.9        |
| MsO <sup>-</sup>              | 173.6    | 49.1        |
| SbF <sub>6</sub> <sup>-</sup> | 125.2    | 28.2        |

<sup>a</sup> The basicity is the free energy change for the reaction  $HA \rightarrow A^- + H^+$  in chloroform, where HA refers to protonated counteranion (A). Au affinity is the Gibbs free energy change of the reaction  $I\text{PrAuA} \rightarrow I\text{PrAu}^+ + A^-$  where L = IPr.

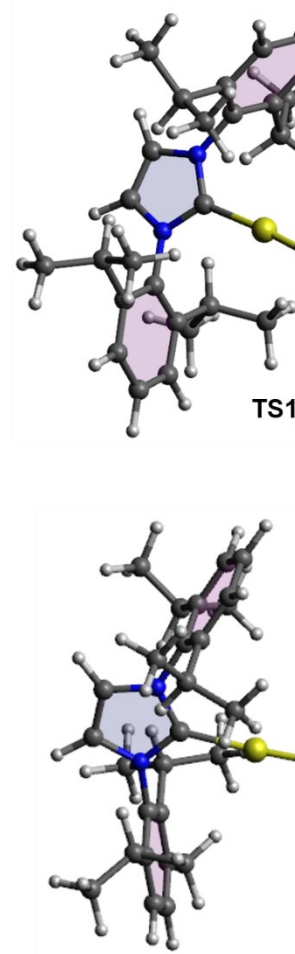

**Figure ESII.** Selected optimized geometries for cyclization (TS1) and protodeauration (TS2) steps of propargylic amide under 5-*exo-dig* (top) and 6-*endo-dig* (bottom) modes under effect of counteranions MsO<sup>-</sup>. Color codes for atoms: Gray: Carbon, white: Hydrogen, blue: Nitrogen, red: Oxygen, yellow: Gold, pale yellow: Sulphur.

### Energetics for each compound examined (in Hartree)

| Species                            | E            | G            |
|------------------------------------|--------------|--------------|
| <b>1</b>                           | -630.184211  | -630.033117  |
| <b>HNTf<sub>2</sub></b>            | -1826.393277 | -1826.376014 |
| <b>NTf<sub>2</sub><sup>-</sup></b> | -1825.944062 | -1825.936629 |
| <b>H<sup>+</sup></b>               | -1294.284337 | -1293.787688 |
| <b>IPrAuNTf<sub>2</sub></b>        | -3120.326879 | -3119.803842 |
| <b>Int1_NTf2</b>                   | -3750.532090 | -3749.827422 |
| <b>TS1_5exo_NTf2</b>               | -3750.524226 | -3749.820721 |
| <b>TS1_6endo_NTf2</b>              | -3750.516986 | -3749.813720 |
| <b>Int2_5exo_NTf2</b>              | -3750.557752 | -3749.854820 |
| <b>Int2_6endo_NTf2</b>             | -3750.556637 | -3749.853747 |
| <b>Int2_5exo</b>                   | -1924.106345 | -1923.445160 |
| <b>Int2_6endo</b>                  | -1924.095379 | -1923.437948 |
| <b>TS2_5exo_NTf2</b>               | -3750.532127 | -3749.832114 |
| <b>TS2_6endo_NTf2</b>              | -3750.518651 | -3749.817011 |
| <b>2exo</b>                        | -630.223501  | -630.069702  |

|                                    |              |              |
|------------------------------------|--------------|--------------|
| <b>2endo</b>                       | -630.216956  | -630.060701  |
|                                    |              |              |
| <b>HClO<sub>4</sub></b>            | -760.844975  | -760.847968  |
| <b>ClO<sub>4</sub><sup>-</sup></b> | -760.403037  | -760.416250  |
| <b>IPrAuClO<sub>4</sub></b>        | -2054.768870 | -2054.269302 |
| <b>Int1_ClO4</b>                   | -2684.984949 | -2684.304640 |
| <b>TS1_5exo_ClO4</b>               | -2684.977985 | -2684.302480 |
| <b>TS1_6endo_ClO4</b>              | -2684.967631 | -2684.282151 |
| <b>Int2_5exo_ClO4</b>              | -2685.013116 | -2684.333159 |
| <b>Int2_6endo_ClO4</b>             | -2685.006118 | -2684.323760 |
| <b>TS2_5exo_ClO4</b>               | -2684.980140 | -2684.306365 |
| <b>TS2_6endo_ClO4</b>              | -2684.964604 | -2684.285001 |
|                                    |              |              |
| <b>TsOH</b>                        | -894.632199  | -894.533130  |
| <b>TsO<sup>-</sup></b>             |              |              |
| <b>IPrAuOTs</b>                    | -2188.545234 | -2187.935551 |
| <b>Int1_TsO</b>                    | -2818.761771 | -2817.974408 |
| <b>TS1_5exo_TsO</b>                | -2818.753680 | -2817.966522 |
| <b>TS1_6endo_TsO</b>               | -2818.735724 | -2817.943284 |
| <b>Int2_5exo_TsO</b>               | -2818.787338 | -2817.999569 |
| <b>Int2_6endo_TsO</b>              | -2818.783071 | -2817.992329 |
| <b>TS2_5exo_TsO</b>                | -2818.747003 | -2817.961046 |
| <b>TS2_6endo_TsO</b>               | -2818.750588 | -2817.967631 |
|                                    |              |              |
| <b>TsOH</b>                        | -894.632199  | -894.533130  |
| <b>TsO<sup>-</sup></b>             | -894.166025  | -894.074145  |
| <b>IPrAuOTs</b>                    | -2188.545234 | -2187.935551 |
| <b>Int1_TsO</b>                    | -2818.761771 | -2817.974408 |
| <b>TS1_5exo_TsO</b>                | -2818.753680 | -2817.966522 |
| <b>TS1_6endo_TsO</b>               | -2818.735724 | -2817.943284 |
| <b>Int2_5exo_TsO</b>               | -2818.787338 | -2817.999569 |
| <b>Int2_6endo_TsO</b>              | -2818.783071 | -2817.992329 |
| <b>TS2_5exo_TsO</b>                | -2818.747003 | -2817.961046 |
| <b>TS2_6endo_TsO</b>               | -2818.750588 | -2817.967631 |
|                                    |              |              |
| <b>HTFA</b>                        | -526.274963  | -526.267252  |
| <b>TFA<sup>-</sup></b>             | -526.274963  | -526.267252  |
| <b>IPrAuTFA</b>                    | -1820.185246 | -1819.674730 |
| <b>Int1_TFA</b>                    | -2450.393152 | -2449.704435 |
| <b>TS1_5exo_TFA</b>                | -2450.384087 | -2449.700790 |
| <b>TS1_6endo_TFA</b>               | -2450.375205 | -2449.686598 |
| <b>Int2_5exo_TFA</b>               | -2450.420878 | -2449.730223 |
| <b>Int2_6endo_TFA</b>              | -2450.412905 | -2449.723185 |
| <b>TS2_5exo_TFA</b>                | -2450.400612 | -2449.714007 |
| <b>TS2_6endo_TFA</b>               | -2450.387105 | -2449.699957 |
|                                    |              |              |
| <b>HSbF<sub>6</sub></b>            | -839.452829  | -839.465809  |
| <b>SbF<sub>6</sub><sup>-</sup></b> | -839.063073  | -839.083599  |
| <b>IPrAuSbF<sub>6</sub></b>        | -2133.411748 | -2132.916233 |
| <b>Int1_SbF6</b>                   | -2763.651799 | -2762.978246 |
| <b>TS1_5exo_SbF6</b>               | -2763.638336 | -2762.967567 |
| <b>TS1_6endo_SbF6</b>              | -2763.628256 | -2762.955986 |
| <b>Int2_5exo_SbF6</b>              | -2763.672392 | -2762.995709 |
| <b>Int2_6endo_SbF6</b>             | -2763.668534 | -2762.991561 |

|                  |              |              |
|------------------|--------------|--------------|
| TS2_5exo_SbF6    | -2763.641380 | -2762.965090 |
| TS2_6endo_SbF6   | -2763.621094 | -2762.947266 |
|                  |              |              |
| MsOH             | -663.860150  | -663.829894  |
| MsO <sup>-</sup> | -663.390947  | -663.370035  |
| IPrAuOMs         | -1957.774261 | -1957.235984 |
| Int1_MsO         | -2587.980630 | -2587.266212 |
| TS1_5exo_MsO     | -2587.976023 | -2587.266287 |
| TS1_6endo_MsO    | -2587.964885 | -2587.249627 |
| Int2_5exo_MsO    | -2588.010402 | -2587.294464 |
| Int2_6endo_MsO   | -2588.005956 | -2587.290334 |
| TS2_5exo_MsO     | -2587.985228 | -2587.273604 |
| TS2_6endo_MsO    | -2587.975616 | -2587.263994 |
|                  |              |              |
| TfOH             | -961.295392  | -961.292496  |
| TfO <sup>-</sup> | -960.851985  | -960.858404  |
| IPrAuOTf         | -2255.220937 | -2254.711240 |
| Int1_TfO         | -2885.439208 | -2884.752129 |
| TS1_5exo_TfO     | -2885.430303 | -2884.747869 |
| TS1_6endo_TfO    | -2885.426520 | -2884.740066 |
| Int2_5exo_TfO    | -2885.466562 | -2884.776054 |
| Int2_6endo_TfO   | -2885.460237 | -2884.770319 |
| TS2_5exo_TfO     | -2885.432269 | -2884.749374 |
| TS2_6endo_TfO    | -2885.424931 | -2884.739753 |

### Cartesian Coordinates:

#### 1

|   |             |             |             |
|---|-------------|-------------|-------------|
| N | 2.26909600  | -0.01513900 | -0.50964100 |
| C | 1.41087200  | 0.92965200  | -0.00275900 |
| C | -0.03824600 | 0.55764600  | 0.01820400  |
| C | -0.50926200 | -0.76752700 | -0.03536700 |
| C | -0.98184800 | 1.60194000  | 0.13307600  |
| C | -1.87968200 | -1.05474400 | -0.00250600 |
| H | 0.19297700  | -1.60753900 | -0.06590700 |
| C | -2.34672500 | 1.33472600  | 0.15960600  |
| H | -0.61467900 | 2.63034700  | 0.19660400  |
| C | -2.80890400 | 0.00153200  | 0.08583500  |
| H | -2.21161800 | -2.09493700 | -0.03288300 |
| H | -3.08248500 | 2.14091000  | 0.23644900  |
| O | -4.16128100 | -0.15577400 | 0.11398500  |
| C | -4.67754900 | -1.48782200 | 0.01568000  |
| H | -4.36116000 | -2.10980700 | 0.87318900  |
| H | -5.77207500 | -1.38259200 | 0.02771200  |
| H | -4.36613500 | -1.97219100 | -0.92793400 |
| O | 1.81410200  | 2.03480000  | 0.40450900  |
| C | 3.70935100  | 0.20192200  | -0.53936500 |
| C | 4.45073300  | -0.89272100 | 0.09132700  |
| C | 5.06223900  | -1.82046600 | 0.59494300  |
| H | 5.60101400  | -2.62938300 | 1.05802300  |
| H | 1.90373300  | -0.86457900 | -0.93635300 |
| H | 4.06136400  | 0.34421800  | -1.58000200 |

H 3.87891000 1.15594100 -0.00774500

#### HNTf<sub>2</sub>

|   |             |             |             |
|---|-------------|-------------|-------------|
| H | -1.84671700 | -0.19096700 | -0.06546900 |
| N | -0.82179300 | -0.09678800 | -0.03371800 |
| S | -0.04513800 | -0.84539300 | 1.29338900  |
| S | -0.10625900 | 0.75762600  | -1.32978300 |
| O | 1.19903800  | 1.26839900  | -0.90044300 |
| O | -1.17589100 | 1.59537400  | -1.89087800 |
| C | 0.20162500  | -0.64432200 | -2.55856400 |
| F | 1.00010100  | -1.55925200 | -2.00192100 |
| F | -0.97673300 | -1.19306900 | -2.88137600 |
| F | 0.78131600  | -0.11809800 | -3.64341800 |
| O | -1.02141700 | -1.80379700 | 1.83132300  |
| O | 1.32715600  | -1.19397700 | 0.91335500  |
| C | 0.04481300  | 0.59823500  | 2.50948800  |
| F | -1.20297500 | 0.98721700  | 2.80049000  |
| F | 0.66525100  | 0.16684500  | 3.61374400  |
| F | 0.72660800  | 1.60565000  | 1.95745100  |

#### IPrAuNTf<sub>2</sub>

|   |             |             |             |
|---|-------------|-------------|-------------|
| C | 0.03360800  | -1.81639700 | 0.01253800  |
| C | -0.56381400 | -4.00285800 | -0.13393200 |
| C | 0.78083400  | -3.95866300 | 0.12284900  |

|    |             |             |             |
|----|-------------|-------------|-------------|
| H  | -1.24550200 | -4.83714300 | -0.27592700 |
| H  | 1.51829600  | -4.74656200 | 0.25048400  |
| N  | 1.12575700  | -2.61293700 | 0.20781900  |
| N  | -1.00142600 | -2.68300300 | -0.19613700 |
| Au | -0.02287400 | 0.15520300  | 0.01681400  |
| C  | -2.35196000 | -2.24265300 | -0.45482500 |
| C  | -3.23561600 | -2.11354200 | 0.64000500  |
| C  | -2.70444100 | -1.91369900 | -1.78247200 |
| C  | -4.52468200 | -1.62157200 | 0.36780300  |
| C  | -4.00761600 | -1.42948300 | -1.99776000 |
| C  | -4.90629600 | -1.28130600 | -0.93558100 |
| H  | -5.23483800 | -1.49374700 | 1.19050900  |
| H  | -4.31502200 | -1.15639100 | -3.01231900 |
| H  | -5.91307300 | -0.89436500 | -1.12408100 |
| C  | 2.44452000  | -2.08122400 | 0.45696600  |
| C  | 2.78024200  | -1.71656900 | 1.77988500  |
| C  | 3.31085000  | -1.89831000 | -0.64338600 |
| C  | 4.04844800  | -1.14343700 | 1.98435100  |
| C  | 4.56653000  | -1.32110300 | -0.38164000 |
| C  | 4.93137100  | -0.94563400 | 0.91656800  |
| H  | 4.34077900  | -0.84062100 | 2.99501300  |
| H  | 5.25930500  | -1.15111300 | -1.21168500 |
| H  | 5.91026800  | -0.48937400 | 1.09665300  |
| C  | -1.72757600 | -2.03755100 | -2.94514400 |
| H  | -0.79863000 | -2.49964900 | -2.56742200 |
| C  | -2.28036200 | -2.95254800 | -4.05251800 |
| H  | -1.53239200 | -3.07383900 | -4.85576000 |
| H  | -2.52950800 | -3.95471400 | -3.66200400 |
| H  | -3.19306100 | -2.53058500 | -4.50921800 |
| C  | -1.36290800 | -0.64742100 | -3.49935900 |
| H  | -2.25186900 | -0.13669900 | -3.91042700 |
| H  | -0.93555100 | -0.00229900 | -2.71112500 |
| H  | -0.61715500 | -0.73675700 | -4.30901500 |
| C  | 2.90397400  | -2.24781700 | -2.06950500 |
| C  | 3.92356100  | -3.18392500 | -2.74186900 |
| H  | 4.06255700  | -4.11328400 | -2.16212000 |
| H  | 3.57689000  | -3.46010600 | -3.75324600 |
| H  | 4.91066800  | -2.70094600 | -2.84995100 |
| C  | 1.82447600  | -1.91050000 | 2.95053100  |
| H  | 0.89928200  | -2.37456700 | 2.56662300  |
| C  | -2.80630600 | -2.42871900 | 2.06775400  |
| C  | -3.82808700 | -3.31153600 | 2.80441200  |
| H  | -4.79148800 | -2.79206600 | 2.94861700  |
| H  | -4.02611900 | -4.24767800 | 2.25370200  |
| H  | -3.44486700 | -3.57753100 | 3.80511800  |
| C  | 1.43637300  | -0.55911600 | 3.57852500  |
| H  | 0.97383100  | 0.11094000  | 2.83267800  |
| H  | 0.71193700  | -0.71000300 | 4.39812300  |
| H  | 2.31823300  | -0.04357000 | 3.99860700  |
| C  | 2.42037900  | -2.86555200 | 4.00126200  |
| H  | 1.69716800  | -3.03461400 | 4.81851700  |
| H  | 2.67335100  | -3.84515800 | 3.55931600  |
| H  | 3.34044800  | -2.44954600 | 4.44861100  |
| C  | 2.68800000  | -0.96752000 | -2.89850000 |
| H  | 1.92415500  | -0.31433200 | -2.44448000 |
| H  | 3.62224200  | -0.38332100 | -2.97882800 |
| H  | 2.36033400  | -1.22451100 | -3.92171100 |
| H  | 1.93975600  | -2.78436500 | -2.03251700 |
| C  | -2.53192000 | -1.12358700 | 2.84020200  |
| H  | -2.18780200 | -1.34667900 | 3.86601900  |
| H  | -1.75950900 | -0.51610700 | 2.33914100  |
| H  | -3.44517300 | -0.50623100 | 2.91298500  |
| H  | -1.85766300 | -2.99253100 | 2.02373500  |

|   |             |            |             |
|---|-------------|------------|-------------|
| N | -0.06377700 | 2.24255600 | 0.00783300  |
| S | -1.01407500 | 3.04188400 | 1.13698500  |
| S | 0.86538100  | 3.06015600 | -1.12698100 |
| O | 0.43196100  | 4.45150200 | -1.34672900 |
| O | 1.07717200  | 2.14005700 | -2.26341900 |
| C | 2.51928600  | 3.14564500 | -0.22553400 |
| F | 2.35824500  | 3.75213600 | 0.96109300  |
| F | 2.99959200  | 1.90382400 | -0.03056800 |
| F | 3.38695300  | 3.84484500 | -0.97682000 |
| O | -1.19553800 | 2.12659900 | 2.28232900  |
| O | -0.62238900 | 4.44782600 | 1.34204800  |
| C | -2.66949000 | 3.06722400 | 0.23476600  |
| F | -3.56008100 | 3.74339300 | 0.98020200  |
| F | -2.52721700 | 3.66959900 | -0.95637900 |
| F | -3.10924800 | 1.80900700 | 0.04780600  |

### Int1\_NTf2

|    |             |             |             |
|----|-------------|-------------|-------------|
| N  | -1.79603200 | 0.34248300  | -2.23224400 |
| C  | -2.08975800 | 1.66853800  | -2.42677300 |
| C  | 2.51097000  | 0.73563700  | 0.49649200  |
| C  | 3.29522600  | 2.35620000  | 1.87904300  |
| C  | 4.19720200  | 1.32879100  | 1.90063900  |
| H  | 3.28753000  | 3.32134400  | 2.37728800  |
| H  | 5.13711900  | 1.20066000  | 2.43076400  |
| N  | 3.70107700  | 0.35008200  | 1.04611800  |
| N  | 2.26710900  | 1.97312300  | 1.02048300  |
| Au | 1.44014900  | -0.38353000 | -0.80766600 |
| C  | 1.15736800  | 2.83066600  | 0.67075300  |
| C  | 1.20985300  | 3.52121500  | -0.56245100 |
| C  | 0.10287300  | 2.98209400  | 1.60188800  |
| C  | 0.14309200  | 4.39082700  | -0.85506200 |
| C  | -0.91856200 | 3.88838800  | 1.26835600  |
| C  | -0.90085800 | 4.58384300  | 0.05458700  |
| H  | 0.13674400  | 4.92604500  | -1.80946800 |
| H  | -1.75085000 | 4.03745500  | 1.96188100  |
| H  | -1.71875500 | 5.26711400  | -0.19085100 |
| C  | 4.38504700  | -0.87686700 | 0.71081500  |
| C  | 5.28332500  | -0.85472100 | -0.38074500 |
| C  | 4.11599000  | -2.03422200 | 1.47360400  |
| C  | 5.94079700  | -2.05770300 | -0.69412900 |
| C  | 4.80443600  | -3.20902100 | 1.11801100  |
| C  | 5.70589900  | -3.22165700 | 0.04771100  |
| H  | 6.64183200  | -2.08076000 | -1.53460300 |
| H  | 4.62297400  | -4.12651400 | 1.68683000  |
| H  | 6.22901800  | -4.14764200 | -0.21245300 |
| C  | 0.06038600  | 2.22227900  | 2.92307500  |
| H  | 0.76685100  | 1.37617300  | 2.85274300  |
| C  | 0.51262100  | 3.12687500  | 4.08611400  |
| H  | 0.49739600  | 2.56699100  | 5.03811900  |
| H  | 1.53450300  | 3.51468400  | 3.93473300  |
| H  | -0.16449200 | 3.99385500  | 4.18933700  |
| C  | -1.33149000 | 1.63144500  | 3.21069300  |
| H  | -2.06999500 | 2.41950200  | 3.44277100  |
| H  | -1.69606700 | 1.04645800  | 2.35482700  |
| H  | -1.28002700 | 0.95876400  | 4.08469400  |
| C  | 3.11991400  | -2.04407100 | 2.62522400  |
| C  | 3.81423500  | -2.36895200 | 3.96024700  |
| H  | 4.61355000  | -1.64217500 | 4.18833000  |
| H  | 3.08164700  | -2.34436700 | 4.78580700  |
| H  | 4.26682200  | -3.37627400 | 3.94178500  |
| C  | 5.52533300  | 0.39619100  | -1.21592000 |
| H  | 4.97232800  | 1.23350300  | -0.75582400 |
| C  | 2.36262100  | 3.37658400  | -1.54941900 |

|   |             |             |             |
|---|-------------|-------------|-------------|
| C | 3.03424600  | 4.73369600  | -1.82989400 |
| H | 2.34358600  | 5.43161500  | -2.33450000 |
| H | 3.37985800  | 5.21349000  | -0.89766800 |
| H | 3.90901500  | 4.59330200  | -2.48920700 |
| C | 4.97707400  | 0.21248300  | -2.64363400 |
| H | 3.89819800  | -0.02312400 | -2.62740200 |
| H | 5.12123200  | 1.13673400  | -3.23069900 |
| H | 5.49659500  | -0.60851200 | -3.16917800 |
| C | 7.01398700  | 0.78580700  | -1.23691300 |
| H | 7.15367500  | 1.72304800  | -1.80363200 |
| H | 7.40477100  | 0.94099100  | -0.21617900 |
| H | 7.63004600  | 0.00776600  | -1.72109700 |
| C | 1.96603000  | -3.02268700 | 2.34252400  |
| H | 1.45242000  | -2.77817900 | 1.39845200  |
| H | 2.32765400  | -4.06432900 | 2.27643300  |
| H | 1.21573400  | -2.97632500 | 3.15015800  |
| H | 2.68275000  | -1.03457900 | 2.71289200  |
| C | 1.89119200  | 2.70962700  | -2.85441600 |
| H | 2.72314800  | 2.64640100  | -3.57810300 |
| H | 1.52572500  | 1.68606600  | -2.65721600 |
| H | 1.06463900  | 3.26911900  | -3.32373500 |
| H | 3.12822000  | 2.71959500  | -1.10097800 |
| C | -3.05488900 | 2.27628600  | -1.46218800 |
| C | -3.38786100 | 1.69596800  | -0.22559000 |
| C | -3.62560100 | 3.52220300  | -1.79930700 |
| C | -4.26709100 | 2.33120000  | 0.65905700  |
| H | -2.94289700 | 0.74789100  | 0.08462000  |
| C | -4.50556500 | 4.16495600  | -0.93319500 |
| H | -3.35597100 | 3.97586600  | -2.75736900 |
| C | -4.82884100 | 3.57503100  | 0.30956900  |
| H | -4.50136700 | 1.85625300  | 1.61347700  |
| H | -4.95637500 | 5.12825400  | -1.19070500 |
| O | -5.68438500 | 4.28527200  | 1.09874100  |
| C | -6.02968400 | 3.72028500  | 2.36788400  |
| H | -5.13754500 | 3.58726600  | 3.00808100  |
| H | -6.71253700 | 4.44263000  | 2.83840300  |
| H | -6.54604100 | 2.74964400  | 2.25176000  |
| O | -1.58405100 | 2.32681700  | -3.35782700 |
| C | -0.89245000 | -0.34609200 | -3.12847000 |
| C | 0.07427800  | -1.18491300 | -2.40037900 |
| C | 0.73432900  | -2.11512100 | -1.89215200 |
| H | 1.11438700  | -3.09451500 | -1.63230900 |
| H | -2.29832700 | -0.24345300 | -1.55217200 |
| H | -1.44063300 | -1.02353700 | -3.81401400 |
| H | -0.38954200 | 0.42454800  | -3.73812700 |
| N | -2.64546600 | -1.90662000 | -0.39535800 |
| S | -2.91019000 | -3.14360300 | -1.44174100 |
| S | -1.82291700 | -2.09506100 | 1.01013000  |
| O | -0.92777900 | -0.92176900 | 1.17946000  |
| O | -1.31313800 | -3.45237600 | 1.31829600  |
| C | -3.17698400 | -1.78306800 | 2.28285400  |
| F | -3.78145100 | -0.59540700 | 2.06152900  |
| F | -4.10551800 | -2.75502100 | 2.24440300  |
| F | -2.61426000 | -1.75786300 | 3.50822800  |
| O | -3.43017300 | -2.50971800 | -2.67708100 |
| O | -1.83145500 | -4.15510900 | -1.53741700 |
| C | -4.38107100 | -4.07706100 | -0.72836800 |
| F | -4.83709000 | -4.94893600 | -1.64894400 |
| F | -4.01131100 | -4.75622100 | 0.37314900  |
| F | -5.36618100 | -3.21786800 | -0.40815300 |

**TS1\_5exo\_NTf2**

|   |             |             |             |
|---|-------------|-------------|-------------|
| N | -2.42402600 | -0.92933700 | -1.68925200 |
|---|-------------|-------------|-------------|

|    |             |             |             |
|----|-------------|-------------|-------------|
| C  | -2.87175600 | -2.22084500 | -1.76326800 |
| C  | 3.34266700  | 0.43858500  | -0.13758800 |
| C  | 4.39621500  | 2.45306700  | -0.13859600 |
| C  | 5.29887100  | 1.51496900  | 0.28526700  |
| H  | 4.48503900  | 3.52612200  | -0.28441400 |
| H  | 6.33814800  | 1.59771800  | 0.59178800  |
| N  | 4.63382100  | 0.29090600  | 0.27767800  |
| N  | 3.20718100  | 1.77553500  | -0.38978000 |
| Au | 1.95352200  | -0.98862000 | -0.46197200 |
| C  | 1.93947500  | 2.35961400  | -0.76040200 |
| C  | 1.55195400  | 2.32756200  | -2.11742100 |
| C  | 1.11522700  | 2.85598100  | 0.27738900  |
| C  | 0.25748900  | 2.78825100  | -2.42352700 |
| C  | -0.16901100 | 3.29702200  | -0.08479100 |
| C  | -0.59903800 | 3.24921300  | -1.41710500 |
| H  | -0.08363300 | 2.77391900  | -3.46378500 |
| H  | -0.84755400 | 3.66940000  | 0.68616300  |
| H  | -1.61326300 | 3.57174600  | -1.66908300 |
| C  | 5.17860300  | -0.96831700 | 0.72526000  |
| C  | 5.86458000  | -1.77826400 | -0.20653900 |
| C  | 4.96217600  | -1.33819400 | 2.07247800  |
| C  | 6.34185400  | -3.01877900 | 0.25413700  |
| C  | 5.45907300  | -2.59021800 | 2.47769700  |
| C  | 6.13994000  | -3.42084500 | 1.57986500  |
| H  | 6.87113600  | -3.68083400 | -0.43803500 |
| H  | 5.30578300  | -2.91862000 | 3.51023800  |
| H  | 6.51533200  | -4.39273100 | 1.91648300  |
| C  | 1.61499500  | 2.96663600  | 1.71362100  |
| H  | 2.49841900  | 2.31224400  | 1.81892600  |
| C  | 2.07498400  | 4.41351200  | 1.98592800  |
| H  | 2.49291000  | 4.49993200  | 3.00461600  |
| H  | 2.84885900  | 4.73841100  | 1.26842500  |
| H  | 1.22608800  | 5.11594900  | 1.90601100  |
| C  | 0.58985500  | 2.50818900  | 2.76111400  |
| H  | -0.31588400 | 3.13901300  | 2.76589600  |
| H  | 0.27410600  | 1.46899100  | 2.58443900  |
| H  | 1.03730600  | 2.57174000  | 3.76892400  |
| C  | 4.19797600  | -0.45021800 | 3.04753500  |
| C  | 4.97675300  | -0.22786900 | 4.35592100  |
| H  | 5.98306700  | 0.18316100  | 4.16290400  |
| H  | 4.43342400  | 0.48422500  | 5.00121300  |
| H  | 5.09628900  | -1.16578900 | 4.92643400  |
| C  | 6.03666900  | -1.36456800 | -1.66273600 |
| H  | 5.77434800  | -0.29521100 | -1.74712900 |
| C  | 2.48460100  | 1.84770900  | -3.22360500 |
| C  | 2.85576400  | 3.01660000  | -4.15619700 |
| H  | 1.96332100  | 3.41495700  | -4.67037100 |
| H  | 3.32128700  | 3.84595600  | -3.59573400 |
| H  | 3.57004600  | 2.68118000  | -4.92868800 |
| C  | 5.06247700  | -2.15363600 | -2.55992000 |
| H  | 4.01655200  | -2.01339200 | -2.23096300 |
| H  | 5.14206900  | -1.81667600 | -3.60889600 |
| H  | 5.28471600  | -3.23528600 | -2.52933100 |
| C  | 7.48734900  | -1.52158000 | -2.14988000 |
| H  | 7.58244400  | -1.14129900 | -3.18202700 |
| H  | 8.19186500  | -0.96017900 | -1.51204300 |
| H  | 7.80468400  | -2.57910300 | -2.15800300 |
| C  | 2.79519100  | -1.02455200 | 3.32573800  |
| H  | 2.21262700  | -1.12795100 | 2.39237200  |
| H  | 2.86024500  | -2.02010500 | 3.80008000  |
| H  | 2.23344900  | -0.35837500 | 4.00412000  |
| H  | 4.06088500  | 0.53880200  | 2.57597800  |
| C  | 1.88474000  | 0.67410700  | -4.01795600 |

|   |             |             |             |   |             |             |             |
|---|-------------|-------------|-------------|---|-------------|-------------|-------------|
| H | 2.59143200  | 0.33725600  | -4.79699800 | C | 4.96803200  | -1.27089200 | 0.35323600  |
| H | 1.67539500  | -0.18574200 | -3.35754200 | C | 5.43255900  | -1.60054400 | -0.93917100 |
| H | 0.94424900  | 0.96121300  | -4.52046700 | C | 4.87733000  | -2.20538700 | 1.40889600  |
| H | 3.41638900  | 1.48570900  | -2.75529900 | C | 5.82666100  | -2.93274300 | -1.15895800 |
| C | -4.27617200 | -2.49129100 | -1.38357600 | C | 5.28258800  | -3.52417300 | 1.13371700  |
| C | -5.24275600 | -1.47348800 | -1.28253000 | C | 5.75204300  | -3.88435500 | -0.13505100 |
| C | -4.63611900 | -3.81347200 | -1.03969800 | H | 6.18688700  | -3.22722300 | -2.14989500 |
| C | -6.53520400 | -1.75122000 | -0.82742300 | H | 5.22240400  | -4.27878400 | 1.92460800  |
| H | -5.00031100 | -0.44310100 | -1.55494500 | H | 6.05893600  | -4.91738400 | -0.32850300 |
| C | -5.91851200 | -4.10371900 | -0.58825600 | C | 1.88368700  | 2.17319000  | 3.33041500  |
| H | -3.88061900 | -4.60088500 | -1.11464600 | H | 2.79863200  | 1.59745200  | 3.10715500  |
| C | -6.87736200 | -3.07109200 | -0.46850700 | C | 2.24707300  | 3.21625700  | 4.40287300  |
| H | -7.25807200 | -0.93651200 | -0.74722700 | H | 2.62037400  | 2.71647400  | 5.31419300  |
| H | -6.20541400 | -5.12051700 | -0.30417900 | H | 3.03029200  | 3.90804600  | 4.04591300  |
| O | -8.09672500 | -3.45156600 | -0.00016400 | H | 1.36919900  | 3.82172000  | 4.68962200  |
| C | -9.08440000 | -2.42822500 | 0.17531900  | C | 0.83086900  | 1.17776500  | 3.85408900  |
| H | -9.34174900 | -1.94678600 | -0.78587100 | H | -0.11032300 | 1.69103400  | 4.11818600  |
| H | -9.97187400 | -2.93927300 | 0.57585700  | H | 0.58959100  | 0.41355200  | 3.09701100  |
| H | -8.74490700 | -1.66090900 | 0.89439800  | H | 1.20619900  | 0.66889200  | 4.75998400  |
| O | -2.07512900 | -3.12350400 | -2.12386100 | C | 4.32810600  | -1.83274500 | 2.78042700  |
| C | -1.01002400 | -0.75046600 | -1.97903500 | C | 5.30408000  | -2.20216200 | 3.91114400  |
| C | -0.19827000 | -1.85088000 | -1.42301600 | H | 6.28636100  | -1.71886300 | 3.76939700  |
| C | 0.65056000  | -2.59628800 | -0.86032500 | H | 4.89890400  | -1.87478700 | 4.88459800  |
| H | 0.87669300  | -3.63274400 | -0.62675600 | H | 5.46830400  | -3.29241000 | 3.96903600  |
| H | -2.84178300 | -0.26753100 | -1.00821900 | C | 5.47332100  | -0.58341200 | -2.07213500 |
| H | -0.83599200 | -0.70050600 | -3.07024400 | H | 5.20598900  | 0.40429200  | -1.65798200 |
| H | -0.68825900 | 0.20761600  | -1.54033700 | C | 2.27713400  | 2.99324100  | -1.74540600 |
| N | -3.12369500 | 0.75391500  | 0.58826800  | C | 2.66216000  | 4.33125700  | -2.40196300 |
| S | -2.30988000 | 0.07177300  | 1.85013500  | H | 1.76874400  | 4.93036700  | -2.65032200 |
| S | -4.52461400 | 1.58451300  | 0.82534300  | H | 3.30153900  | 4.93791300  | -1.73713900 |
| O | -5.31874500 | 1.20424000  | 2.01605400  | H | 3.21545400  | 4.15093400  | -3.34052200 |
| O | -5.18205500 | 1.69325400  | -0.49976700 | C | 4.42520300  | -0.92886800 | -3.14699300 |
| C | -3.94294600 | 3.34496900  | 1.17549600  | H | 3.41325000  | -0.98553300 | -2.70693700 |
| F | -3.02070800 | 3.37108600  | 2.15615200  | H | 4.41624300  | -0.15740200 | -3.93727400 |
| F | -3.40778700 | 3.88936000  | 0.06088000  | H | 4.64257400  | -1.90225600 | -3.62179200 |
| F | -5.00273000 | 4.08623200  | 1.55009200  | C | 6.88118800  | -0.46260300 | -2.68186900 |
| O | -0.94304800 | -0.21633400 | 1.35069800  | H | 6.89008900  | 0.31379800  | -3.46683800 |
| O | -2.49659200 | 0.72216400  | 3.16660000  | H | 7.62894700  | -0.18668200 | -1.91800100 |
| C | -3.08538800 | -1.64990700 | 2.05142200  | H | 7.20550800  | -1.41025600 | -3.14656300 |
| F | -2.52246600 | -2.51169500 | 1.18039900  | C | 2.94610300  | -2.47820600 | 2.99964300  |
| F | -2.84031800 | -2.08141700 | 3.30314700  | H | 2.23929600  | -2.17873000 | 2.20470000  |
| F | -4.41179000 | -1.61610300 | 1.84747700  | H | 3.01575400  | -3.58071400 | 2.99748100  |

### TS1\_gendo\_NTf2

|    |             |             |             |   |             |             |             |
|----|-------------|-------------|-------------|---|-------------|-------------|-------------|
| N  | -2.16367800 | -1.54666700 | -1.99569800 | H | 4.18919200  | -0.73826400 | 2.80864800  |
| C  | -2.47970300 | -2.79977300 | -1.54512500 | C | 1.40008200  | 2.14330300  | -2.68354200 |
| C  | 3.22114200  | 0.47879400  | 0.44347300  | H | 1.90147900  | 1.99442300  | -3.65660800 |
| C  | 4.50540000  | 2.22777900  | 1.12010600  | H | 1.21167900  | 1.15033100  | -2.23558700 |
| C  | 5.32430000  | 1.13568800  | 1.01308900  | H | 0.42145600  | 2.62025900  | -2.86662200 |
| H  | 4.70622400  | 3.25567500  | 1.41030400  | H | 3.21041300  | 2.43063000  | -1.56646300 |
| H  | 6.38850800  | 1.00920300  | 1.19376400  | C | -3.88877200 | -3.01103500 | -1.12022000 |
| N  | 4.52089000  | 0.08016600  | 0.59535900  | C | -4.93792000 | -2.14943500 | -1.49383500 |
| N  | 3.22671100  | 1.80675100  | 0.76856900  | C | -4.17733800 | -4.11110700 | -0.28278700 |
| Au | 1.70270100  | -0.65004700 | -0.26907400 | C | -6.24073300 | -2.35813800 | -1.02895800 |
| C  | 2.04935100  | 2.64496900  | 0.80082700  | H | -4.75671400 | -1.30407100 | -2.16494600 |
| C  | 1.58166200  | 3.20953700  | -0.40688500 | C | -5.46764800 | -4.32910600 | 0.18763000  |
| C  | 1.40781300  | 2.83912300  | 2.04512800  | H | -3.36166000 | -4.78292700 | -0.00015200 |
| C  | 0.41446600  | 3.99209700  | -0.33993100 | C | -6.51151900 | -3.44807800 | -0.17691300 |
| C  | 0.25994200  | 3.64922200  | 2.05616800  | H | -7.03210500 | -1.67110900 | -1.33644000 |
| C  | -0.23686700 | 4.21412100  | 0.87752600  | H | -5.69886600 | -5.17176200 | 0.84618700  |
| H  | 0.00198200  | 4.41950400  | -1.25901400 | O | -7.73652900 | -3.73928800 | 0.34039300  |
| H  | -0.27383400 | 3.80945400  | 2.99813000  | C | -8.82281300 | -2.86985800 | -0.00120900 |
| H  | -1.15277900 | 4.81077100  | 0.90535000  | H | -9.01452600 | -2.87189100 | -1.08986500 |
|    |             |             |             | H | -9.70088200 | -3.27211500 | 0.52467000  |

|   |             |             |             |
|---|-------------|-------------|-------------|
| H | -8.63296000 | -1.83552100 | 0.33871400  |
| O | -1.62633300 | -3.72520400 | -1.47964800 |
| C | -0.80340100 | -1.17063000 | -2.32565100 |
| C | 0.15001200  | -1.63034700 | -1.25183000 |
| C | 0.24712300  | -2.69079100 | -0.57178600 |
| H | 0.48810500  | -3.50388500 | 0.09645800  |
| H | -2.72387000 | -0.74914000 | -1.64188800 |
| H | -0.48455300 | -1.64938700 | -3.26934400 |
| H | -0.77924800 | -0.08127500 | -2.45955900 |
| N | -2.98975900 | 0.92416500  | -0.80620200 |
| S | -2.52950700 | 1.10566800  | 0.76172700  |
| S | -4.19788700 | 1.79162100  | -1.49047400 |
| O | -5.23790800 | 2.32895900  | -0.58414800 |
| O | -4.59808700 | 1.05328900  | -2.71417300 |
| C | -3.27473500 | 3.29404900  | -2.14763600 |
| F | -2.78303900 | 4.03142700  | -1.13320200 |
| F | -2.25215800 | 2.90208600  | -2.93804400 |
| F | -4.11807700 | 4.05319500  | -2.87368000 |
| O | -1.11147700 | 0.68546900  | 0.84269900  |
| O | -2.98452200 | 2.34361100  | 1.43350100  |
| C | -3.46264700 | -0.28748600 | 1.62094700  |
| F | -2.90433100 | -1.47492800 | 1.31012300  |
| F | -3.38324400 | -0.10711600 | 2.95429200  |
| F | -4.75609200 | -0.29313400 | 1.25176900  |

### Int2\_5exo\_NTf2

|    |             |             |             |
|----|-------------|-------------|-------------|
| N  | 2.45198600  | 1.10110200  | -0.45309500 |
| C  | 2.59091400  | 2.41512500  | -0.44055700 |
| C  | -3.68140300 | -0.55399300 | -0.00087000 |
| C  | -4.48343200 | -2.69184000 | -0.01213600 |
| C  | -5.51525100 | -1.86765100 | 0.34638400  |
| H  | -4.43290800 | -3.76971400 | -0.14253500 |
| H  | -6.55215100 | -2.07457200 | 0.59825700  |
| N  | -5.00489200 | -0.57121100 | 0.34693600  |
| N  | -3.37520500 | -1.87362300 | -0.21469200 |
| Au | -2.36942500 | 0.99308800  | -0.15682600 |
| C  | -2.06830600 | -2.31859400 | -0.63998600 |
| C  | -1.75418100 | -2.24284700 | -2.01551400 |
| C  | -1.15435400 | -2.77140000 | 0.34110200  |
| C  | -0.45876900 | -2.63484200 | -2.40164200 |
| C  | 0.12851200  | -3.14436900 | -0.09977900 |
| C  | 0.47240200  | -3.07615400 | -1.45586200 |
| H  | -0.17856200 | -2.58855000 | -3.45914300 |
| H  | 0.87652300  | -3.48011600 | 0.62380300  |
| H  | 1.47600700  | -3.36825600 | -1.77337200 |
| C  | -5.76618500 | 0.61704000  | 0.64415200  |
| C  | -6.45360900 | 1.25013000  | -0.41588200 |
| C  | -5.76872200 | 1.10435400  | 1.96971600  |
| C  | -7.16906400 | 2.42159900  | -0.10967900 |
| C  | -6.50243500 | 2.27828700  | 2.22128400  |
| C  | -7.19421200 | 2.93025700  | 1.19437400  |
| H  | -7.70667500 | 2.94596800  | -0.90596400 |
| H  | -6.52310200 | 2.68890700  | 3.23581400  |
| H  | -7.75566800 | 3.84503300  | 1.41104200  |
| C  | -1.51744800 | -2.79558600 | 1.82127000  |
| H  | -2.61846600 | -2.84374000 | 1.89828800  |
| C  | -0.95070300 | -4.02037200 | 2.55753200  |
| H  | -1.32905700 | -4.04089100 | 3.59447200  |
| H  | -1.24417200 | -4.96481900 | 2.06698600  |
| H  | 0.15130100  | -3.99091900 | 2.61277400  |
| C  | -1.05861500 | -1.49034100 | 2.50383300  |
| H  | 0.04269300  | -1.41435100 | 2.49814300  |
| H  | -1.46632700 | -0.60385500 | 1.98514400  |

|   |             |             |             |
|---|-------------|-------------|-------------|
| H | -1.39952700 | -1.46543600 | 3.55457000  |
| C | -4.99073100 | 0.42622300  | 3.08968900  |
| C | -5.89789000 | 0.06643200  | 4.27942400  |
| H | -6.73692100 | -0.57939300 | 3.96664900  |
| H | -5.31841800 | -0.47318000 | 5.04907900  |
| H | -6.32282600 | 0.96812800  | 4.75488800  |
| C | -6.38965800 | 0.72819200  | -1.84593400 |
| H | -5.94444200 | -0.28198900 | -1.82320400 |
| C | -2.74594900 | -1.74786800 | -3.06075100 |
| C | -3.04494300 | -2.83528700 | -4.10895800 |
| H | -2.13921800 | -3.10688800 | -4.67968600 |
| H | -3.43435200 | -3.75427200 | -3.63719800 |
| H | -3.79920300 | -2.47412800 | -4.83043500 |
| C | -5.46446200 | 1.62054900  | -2.69602500 |
| H | -4.45005800 | 1.66743400  | -2.26138500 |
| H | -5.38388500 | 1.22575300  | -3.72453600 |
| H | -5.85638800 | 2.65169700  | -2.75624100 |
| C | -7.78440100 | 0.60077200  | -2.48231400 |
| H | -7.70245300 | 0.15601900  | -3.48957300 |
| H | -8.44690800 | -0.04198800 | -1.87677200 |
| H | -8.27549200 | 1.58335900  | -2.59425200 |
| C | -3.80945100 | 1.30951300  | 3.53499200  |
| H | -3.14061500 | 1.53488600  | 2.68482500  |
| H | -4.16553700 | 2.26833000  | 3.95223600  |
| H | -3.21766200 | 0.79817400  | 4.31464200  |
| H | -4.57206400 | -0.51594600 | 2.69648400  |
| C | -2.24143200 | -0.45334000 | -3.72451000 |
| H | -2.98810800 | -0.07016900 | -4.44236400 |
| H | -2.05726300 | 0.32855600  | -2.96539400 |
| H | -1.29972800 | -0.62395200 | -4.27641000 |
| H | -3.69507400 | -1.50824900 | -2.55139000 |
| C | 3.81838700  | 3.17616300  | -0.40047600 |
| C | 5.07451400  | 2.53043900  | -0.44171400 |
| C | 3.76517600  | 4.59071300  | -0.31333700 |
| C | 6.25321700  | 3.27104300  | -0.39454900 |
| H | 5.14915700  | 1.44227600  | -0.52191800 |
| C | 4.93628200  | 5.33194700  | -0.26529000 |
| H | 2.79655100  | 5.09596400  | -0.28050600 |
| C | 6.19280300  | 4.67983700  | -0.30124200 |
| H | 7.21025500  | 2.74704500  | -0.43474600 |
| H | 4.91282100  | 6.42282700  | -0.19501400 |
| O | 7.27280200  | 5.49204000  | -0.24282400 |
| C | 8.57455600  | 4.88400200  | -0.25771900 |
| H | 8.74337500  | 4.32622000  | -1.19569200 |
| H | 9.28777600  | 5.71779600  | -0.19325300 |
| H | 8.71067900  | 4.21263400  | 0.60846400  |
| O | 1.42026200  | 3.05615100  | -0.46752900 |
| C | 1.03889000  | 0.71902900  | -0.47891100 |
| C | 0.35373400  | 2.06876400  | -0.41456400 |
| C | -0.93168800 | 2.42584100  | -0.30592300 |
| H | -1.12998900 | 3.50772200  | -0.28160500 |
| H | 3.21552600  | 0.39936800  | -0.29720700 |
| H | 0.80929500  | 0.15787700  | -1.40319200 |
| H | 0.80879300  | 0.07146200  | 0.38224900  |
| N | 4.29878700  | -0.94086700 | 0.22566800  |
| S | 3.64109300  | -1.77921100 | 1.48292000  |
| S | 5.43546700  | -1.58858700 | -0.77412700 |
| O | 6.29164400  | -2.63780000 | -0.17985900 |
| O | 6.04679400  | -0.44660300 | -1.49560100 |
| C | 4.40813400  | -2.45873200 | -2.08914000 |
| F | 3.85786000  | -3.58220800 | -1.59209400 |
| F | 3.42584400  | -1.64040000 | -2.52126300 |
| F | 5.20206900  | -2.77954300 | -3.12688900 |



|   |            |             |            |
|---|------------|-------------|------------|
| O | 2.42457400 | -1.02771200 | 1.87656700 |
| O | 3.57809900 | -3.24994100 | 1.32086000 |
| C | 4.84920600 | -1.46298000 | 2.89166000 |
| F | 5.00885200 | -0.13707900 | 3.05715100 |
| F | 4.33878600 | -1.99154700 | 4.02071100 |
| F | 6.04036200 | -2.02524600 | 2.63640100 |

|   |             |             |             |
|---|-------------|-------------|-------------|
| H | -6.71748200 | -1.14165000 | -3.91546500 |
| H | -7.73840200 | -0.56940900 | -2.56497400 |
| H | -7.26049800 | 0.55352300  | -3.86715700 |
| C | -3.98206900 | 2.83909000  | 2.54973100  |
| H | -3.16342200 | 2.57594800  | 1.85617100  |
| H | -4.21509000 | 3.91015800  | 2.41186600  |
| H | -3.61762300 | 2.69975700  | 3.58296000  |
| H | -4.93146100 | 0.91561100  | 2.46401200  |
| C | -1.73795400 | -2.48036600 | -2.49405100 |
| H | -2.28454800 | -2.61536300 | -3.44453100 |
| H | -1.72414100 | -1.40213700 | -2.25195600 |
| H | -0.69392600 | -2.80501900 | -2.64997900 |
| H | -3.43313000 | -2.88425700 | -1.23819100 |
| C | 3.78238100  | 2.99327500  | -0.84275300 |
| C | 4.91800900  | 2.20801400  | -1.14363900 |
| C | 3.96302200  | 4.32714100  | -0.39980600 |
| C | 6.20303400  | 2.72538600  | -0.98687400 |
| H | 4.80850300  | 1.19018400  | -1.53000500 |
| C | 5.23961500  | 4.84855000  | -0.24397100 |
| H | 3.08943000  | 4.94062200  | -0.16558900 |
| C | 6.37310600  | 4.05111700  | -0.53025400 |
| H | 7.06323800  | 2.09952300  | -1.23221200 |
| H | 5.39382400  | 5.87308400  | 0.10570300  |
| O | 7.57260200  | 4.65058600  | -0.34107400 |
| C | 8.75617700  | 3.88827500  | -0.62407800 |
| H | 8.79639600  | 3.59480200  | -1.68812100 |
| H | 9.59751800  | 4.55758300  | -0.39536500 |
| H | 8.81613800  | 2.98885400  | 0.01414000  |
| O | 1.44179300  | 3.33058900  | -1.02691400 |
| C | 0.85603500  | 0.58285300  | -1.22636800 |
| C | -0.23227000 | 1.55441200  | -0.81811300 |
| C | 0.10905500  | 2.84948800  | -0.76489000 |
| H | -0.51320400 | 3.70943500  | -0.51593200 |
| H | 2.94642300  | 0.46253600  | -0.76701100 |
| H | 0.76028100  | 0.29793700  | -2.29268200 |
| H | 0.81482100  | -0.34792300 | -0.64067200 |
| N | 3.80119900  | -1.00256500 | -0.26848900 |
| S | 3.76509200  | -1.36100800 | 1.33624800  |
| S | 4.44772000  | -1.97894100 | -1.41608000 |
| O | 5.50840200  | -2.90602400 | -0.96466900 |
| O | 4.66224000  | -1.11893100 | -2.60525900 |
| C | 2.99827700  | -3.07997500 | -1.90248200 |
| F | 2.70565600  | -3.94255900 | -0.91162400 |
| F | 1.90895100  | -2.32482300 | -2.16522600 |
| F | 3.32204400  | -3.77481400 | -3.00846700 |
| O | 2.71559100  | -0.50212600 | 1.93060000  |
| O | 3.83516600  | -2.80111200 | 1.67624000  |
| C | 5.38780500  | -0.61891900 | 1.93372100  |
| F | 5.39090800  | 0.70891200  | 1.70623600  |
| F | 5.51272900  | -0.83909200 | 3.25654500  |
| F | 6.42732200  | -1.17860900 | 1.29086800  |

### Int2\_gendo\_NTf2

|    |             |             |             |
|----|-------------|-------------|-------------|
| N  | 2.19277000  | 1.15502300  | -1.00216200 |
| C  | 2.43835600  | 2.44701700  | -0.96910400 |
| C  | -3.58604900 | -0.41593600 | 0.33446700  |
| C  | -4.70736500 | -2.21988800 | 1.16606900  |
| C  | -5.63704000 | -1.26357200 | 0.85571900  |
| H  | -4.80947500 | -3.21836300 | 1.58313900  |
| H  | -6.72013000 | -1.25283600 | 0.94560500  |
| N  | -4.93123900 | -0.17316400 | 0.35048500  |
| N  | -3.46599000 | -1.68397800 | 0.83965800  |
| Au | -1.99647000 | 0.69691100  | -0.27339900 |
| C  | -2.18257600 | -2.32406900 | 1.01450700  |
| C  | -1.65802500 | -3.08587000 | -0.05372800 |
| C  | -1.47630800 | -2.08948600 | 2.21576700  |
| C  | -0.36507700 | -3.61617600 | 0.10766200  |
| C  | -0.18744400 | -2.64181300 | 2.32268300  |
| C  | 0.36713500  | -3.39065900 | 1.27902200  |
| H  | 0.08583500  | -4.18982500 | -0.70707200 |
| H  | 0.40258300  | -2.45863700 | 3.22601000  |
| H  | 1.38645800  | -3.77554500 | 1.37195400  |
| C  | -5.51957200 | 1.06624200  | -0.09375000 |
| C  | -5.87901900 | 1.19013600  | -1.45434200 |
| C  | -5.68228300 | 2.10522500  | 0.84932100  |
| C  | -6.42963200 | 2.41807000  | -1.86441600 |
| C  | -6.24057100 | 3.31079700  | 0.38697200  |
| C  | -6.61210700 | 3.46545100  | -0.95368300 |
| H  | -6.71111500 | 2.55625100  | -2.91322700 |
| H  | -6.37594200 | 4.14112300  | 1.08736800  |
| H  | -7.04032600 | 4.41402000  | -1.29391100 |
| C  | -2.04026200 | -1.23754900 | 3.34564200  |
| H  | -3.07368100 | -0.95222400 | 3.08164600  |
| C  | -2.10246200 | -2.02309100 | 4.66779100  |
| H  | -2.56069300 | -1.40398500 | 5.45922500  |
| H  | -2.70268600 | -2.94368500 | 4.56230200  |
| H  | -1.09461500 | -2.31409500 | 5.01219400  |
| C  | -1.22572500 | 0.06050000  | 3.50439000  |
| H  | -0.17578600 | -0.15673800 | 3.76892000  |
| H  | -1.22159300 | 0.63926000  | 2.56348700  |
| H  | -1.65726200 | 0.69252600  | 4.30109400  |
| C  | -5.22602200 | 1.96602500  | 2.29597500  |
| C  | -6.35124100 | 2.29390100  | 3.29258400  |
| H  | -7.23897800 | 1.66021900  | 3.12182100  |
| H  | -6.00324700 | 2.12448600  | 4.32672900  |
| H  | -6.66878000 | 3.34896300  | 3.21811600  |
| C  | -5.63869600 | 0.07143200  | -2.45977800 |
| H  | -5.32820000 | -0.82919900 | -1.90221400 |
| C  | -2.41104400 | -3.28311100 | -1.36379600 |
| C  | -2.53705200 | -4.77119900 | -1.73502000 |
| H  | -1.54911600 | -5.22924000 | -1.91728700 |
| H  | -3.03389000 | -5.34622900 | -0.93426400 |
| H  | -3.13146000 | -4.88419000 | -2.65870800 |
| C  | -4.48603200 | 0.44752500  | -3.41099300 |
| H  | -3.56614000 | 0.68158700  | -2.84549000 |
| H  | -4.26611700 | -0.38632100 | -4.10112600 |
| H  | -4.74587600 | 1.33289900  | -4.01853300 |
| C  | -6.91355500 | -0.28838200 | -3.24266300 |

### Int2\_Sexo

|   |             |             |             |
|---|-------------|-------------|-------------|
| N | -3.91866100 | 1.21278700  | -2.26059800 |
| C | -3.63117300 | 0.15538600  | -1.57257700 |
| C | 2.21193300  | -1.56511300 | 0.13864300  |
| C | 4.08720600  | -2.70983700 | 0.77720300  |

|    |             |             |             |
|----|-------------|-------------|-------------|
| C  | 3.01991600  | -3.28899500 | 1.40632500  |
| H  | 5.14989200  | -2.93697300 | 0.79924700  |
| H  | 2.95340200  | -4.12810100 | 2.09402500  |
| N  | 1.89066100  | -2.57761800 | 1.00610000  |
| N  | 3.57399100  | -1.66664000 | 0.01033400  |
| Au | 0.97500000  | -0.22641900 | -0.77085200 |
| C  | 4.36395500  | -0.76455800 | -0.78942800 |
| C  | 4.62954400  | -1.10805000 | -2.13366000 |
| C  | 4.81463200  | 0.43453600  | -0.19378500 |
| C  | 5.38061400  | -0.19424500 | -2.89488100 |
| C  | 5.56485700  | 1.31134100  | -0.99816400 |
| C  | 5.84447800  | 1.00173800  | -2.33413900 |
| H  | 5.59706600  | -0.42087200 | -3.94370300 |
| H  | 5.92507200  | 2.25312800  | -0.57112300 |
| H  | 6.42483300  | 1.70068300  | -2.94549500 |
| C  | 0.55454500  | -2.84864200 | 1.47511700  |
| C  | -0.25001100 | -3.74774000 | 0.74139700  |
| C  | 0.11472500  | -2.20439600 | 2.65366400  |
| C  | -1.53883200 | -4.01374000 | 1.23908500  |
| C  | -1.18576900 | -2.49709300 | 3.10189300  |
| C  | -2.00190900 | -3.39791200 | 2.40786400  |
| H  | -2.18918700 | -4.70574400 | 0.69386000  |
| H  | -1.56412700 | -2.00775900 | 4.00490700  |
| H  | -3.01103900 | -3.61225800 | 2.77496600  |
| C  | 4.49083400  | 0.79673100  | 1.25011300  |
| H  | 3.92446700  | -0.03923900 | 1.69533800  |
| C  | 5.77054400  | 0.98590100  | 2.08442000  |
| H  | 5.51314400  | 1.21577800  | 3.13347100  |
| H  | 6.39463100  | 0.07491400  | 2.07728800  |
| H  | 6.38568900  | 1.81909000  | 1.70051200  |
| C  | 3.58826100  | 2.04244200  | 1.31191100  |
| H  | 4.10006900  | 2.93086700  | 0.90054800  |
| H  | 2.66033800  | 1.88294900  | 0.73465000  |
| H  | 3.31204700  | 2.26516600  | 2.35799700  |
| C  | 0.98031800  | -1.19380000 | 3.39548100  |
| C  | 1.09418400  | -1.51378100 | 4.89601900  |
| H  | 1.48170700  | -2.53372900 | 5.06478000  |
| H  | 1.78287200  | -0.80152400 | 5.38348400  |
| H  | 0.11880700  | -1.43278100 | 5.40771100  |
| C  | 0.21905300  | -4.38324800 | -0.56050700 |
| H  | 1.27469000  | -4.10276900 | -0.71833900 |
| C  | 4.09175200  | -2.38746800 | -2.76217200 |
| C  | 5.19489100  | -3.19452800 | -3.46814700 |
| H  | 5.61355900  | -2.64774200 | -4.33129800 |
| H  | 6.02596600  | -3.43022700 | -2.78062500 |
| H  | 4.78403600  | -4.14649300 | -3.84807200 |
| C  | -0.58821600 | -3.82463900 | -1.74814800 |
| H  | -0.52087100 | -2.72325800 | -1.78868700 |
| H  | -0.20230300 | -4.23005300 | -2.70065300 |
| H  | -1.65623100 | -4.09677500 | -1.67051900 |
| C  | 0.15065000  | -5.91946700 | -0.50589100 |
| H  | 0.54253600  | -6.35253500 | -1.44317200 |
| H  | 0.74739000  | -6.32040600 | 0.33223100  |
| H  | -0.88737500 | -6.27619100 | -0.38365800 |
| C  | 0.44656300  | 0.23331500  | 3.16582300  |
| H  | 0.40541600  | 0.46990900  | 2.08776600  |
| H  | -0.57216300 | 0.34730700  | 3.57813800  |
| H  | 1.10000000  | 0.97461000  | 3.65998200  |
| H  | 1.99813600  | -1.23715300 | 2.97007100  |
| C  | 2.93091700  | -2.06621200 | -3.72334500 |
| H  | 2.50639400  | -2.99731200 | -4.14016100 |
| H  | 2.12371400  | -1.52150400 | -3.20120300 |
| H  | 3.27534200  | -1.43975400 | -4.56560100 |

|   |             |             |             |
|---|-------------|-------------|-------------|
| H | 3.68565300  | -3.02049200 | -1.95420800 |
| C | -4.56938800 | -0.86831000 | -1.10493100 |
| C | -5.93383600 | -0.77797400 | -1.44230000 |
| C | -4.13067500 | -1.95840400 | -0.32054000 |
| C | -6.84792500 | -1.74614400 | -1.01759300 |
| H | -6.27354700 | 0.06638000  | -2.04934200 |
| C | -5.03374200 | -2.92821800 | 0.10807300  |
| H | -3.07658600 | -2.04045500 | -0.04377300 |
| C | -6.39909300 | -2.83277600 | -0.23706600 |
| H | -7.89975200 | -1.65192400 | -1.29651200 |
| H | -4.70439400 | -3.77555600 | 0.71700900  |
| O | -7.19888500 | -3.83393400 | 0.22907300  |
| C | -8.59089300 | -3.77381100 | -0.09870500 |
| H | -8.75126200 | -3.81090700 | -1.19202600 |
| H | -9.04424800 | -4.66137700 | 0.36638600  |
| H | -9.06483200 | -2.86323100 | 0.31189400  |
| O | -2.30913400 | -0.05024200 | -1.24128800 |
| C | -2.63815600 | 1.90295100  | -2.47718900 |
| C | -1.58306700 | 1.02870300  | -1.80928700 |
| C | -0.24400700 | 1.10632000  | -1.69954700 |
| H | 0.17553800  | 1.99632200  | -2.19656200 |
| H | -2.45131800 | 2.03338000  | -3.56055900 |
| H | -2.67710800 | 2.92079600  | -2.04180400 |

### Int2\_6endo

|    |             |             |             |
|----|-------------|-------------|-------------|
| N  | 2.94951000  | -2.73678200 | 0.61903700  |
| C  | 3.86568200  | -2.48958000 | -0.24715400 |
| C  | -1.03904700 | 2.25258400  | 0.33956800  |
| C  | -2.07398800 | 4.25190500  | 0.73640700  |
| C  | -3.05216400 | 3.30865000  | 0.58201100  |
| H  | -2.12346000 | 5.31885300  | 0.93748600  |
| H  | -4.13613600 | 3.37901300  | 0.61787900  |
| N  | -2.40134700 | 2.10012700  | 0.34412300  |
| N  | -0.85858200 | 3.58868700  | 0.58451500  |
| Au | 0.38492600  | 0.81926900  | 0.05288400  |
| C  | 0.43404600  | 4.22527400  | 0.64286400  |
| C  | 1.09980800  | 4.29186400  | 1.88667600  |
| C  | 0.97261700  | 4.75165000  | -0.55275200 |
| C  | 2.36009100  | 4.91675000  | 1.90932300  |
| C  | 2.23559700  | 5.36543600  | -0.47440400 |
| C  | 2.92175300  | 5.44882100  | 0.74299400  |
| H  | 2.90948500  | 4.97928500  | 2.85414800  |
| H  | 2.68865200  | 5.77624400  | -1.38225100 |
| H  | 3.90526700  | 5.92848100  | 0.78188300  |
| C  | -3.06869900 | 0.84758100  | 0.08784900  |
| C  | -3.43293100 | 0.03939900  | 1.18843900  |
| C  | -3.32239900 | 0.48774400  | -1.25441900 |
| C  | -4.08085500 | -1.17685300 | 0.90685800  |
| C  | -3.97347200 | -0.73884000 | -1.47976300 |
| C  | -4.35070700 | -1.56116100 | -0.41219600 |
| H  | -4.36957500 | -1.83528800 | 1.73206200  |
| H  | -4.18043000 | -1.05388800 | -2.50766400 |
| H  | -4.85487100 | -2.51299200 | -0.60935400 |
| C  | 0.25121500  | 4.62723100  | -1.88889300 |
| H  | -0.76777400 | 4.24935200  | -1.69450900 |
| C  | 0.10934300  | 5.98420300  | -2.60039900 |
| H  | -0.47066900 | 5.86508300  | -3.53252000 |
| H  | -0.41182600 | 6.72113700  | -1.96462100 |
| H  | 1.09185300  | 6.40791000  | -2.87358100 |
| C  | 0.96165300  | 3.59509000  | -2.78559300 |
| H  | 1.99385400  | 3.91402700  | -3.01713200 |
| H  | 1.01289300  | 2.61054800  | -2.28723100 |
| H  | 0.42035600  | 3.47403100  | -3.74082700 |

|   |             |             |             |    |             |             |             |
|---|-------------|-------------|-------------|----|-------------|-------------|-------------|
| C | -2.88985000 | 1.35734600  | -2.42822600 | Au | 0.94993400  | -0.21648400 | -0.83741600 |
| C | -4.08279700 | 1.75106600  | -3.31697300 | C  | 4.28761100  | -0.60614900 | -0.78671700 |
| H | -4.85765200 | 2.28503600  | -2.73931900 | C  | 4.69508300  | -1.11621100 | -2.04022000 |
| H | -3.74759300 | 2.41462200  | -4.13356600 | C  | 4.56144100  | 0.71473100  | -0.35847700 |
| H | -4.55535800 | 0.86630400  | -3.77900500 | C  | 5.43497200  | -0.25874100 | -2.87491500 |
| C | -3.08689400 | 0.42766800  | 2.62051200  | C  | 5.30612500  | 1.52668700  | -1.23286000 |
| H | -2.79457300 | 1.49231500  | 2.62400700  | C  | 5.74311600  | 1.04534000  | -2.47292500 |
| C | 0.51415000  | 3.68368100  | 3.15449900  | H  | 5.76320700  | -0.61456600 | -3.85614200 |
| C | 0.40947900  | 4.71500200  | 4.29155500  | H  | 5.54071800  | 2.55431600  | -0.94146100 |
| H | 1.40310400  | 5.08529600  | 4.59987000  | H  | 6.31936800  | 1.69808600  | -3.13698100 |
| H | -0.19819100 | 5.58683800  | 3.99213700  | C  | 0.54858800  | -2.82426900 | 1.49329800  |
| H | -0.06413900 | 4.25715500  | 5.17790400  | C  | -0.23399000 | -3.61300200 | 0.61957600  |
| C | -1.87080300 | -0.38517300 | 3.10782600  | C  | 0.08861500  | -2.38749800 | 2.76021800  |
| H | -1.00209600 | -0.23284800 | 2.44205300  | C  | -1.51808800 | -3.98650900 | 1.05965600  |
| H | -1.58259900 | -0.07839300 | 4.12937800  | C  | -1.20070700 | -2.79285000 | 3.14882800  |
| H | -2.09939500 | -1.46585600 | 3.12556400  | C  | -1.99379800 | -3.58818900 | 2.31279600  |
| C | -4.27996500 | 0.27542500  | 3.57862600  | H  | -2.15124100 | -4.59610600 | 0.40708500  |
| H | -4.00658100 | 0.64477800  | 4.58256600  | H  | -1.59407600 | -2.47381300 | 4.11829000  |
| H | -5.15594800 | 0.84912700  | 3.22906900  | H  | -2.99267300 | -3.89535800 | 2.64053400  |
| H | -4.58711700 | -0.77933100 | 3.68927600  | C  | 4.08998100  | 1.23003700  | 0.99699300  |
| C | -1.78979500 | 0.65111800  | -3.24199600 | H  | 3.15476000  | 0.70108300  | 1.24779700  |
| H | -0.92811900 | 0.39981500  | -2.59801000 | C  | 5.12579900  | 0.89674400  | 2.08970700  |
| H | -2.16460700 | -0.28534500 | -3.69230400 | H  | 4.76613100  | 1.23818100  | 3.07662000  |
| H | -1.43475400 | 1.30260500  | -4.06021100 | H  | 5.31487800  | -0.18903600 | 2.15414700  |
| H | -2.45488300 | 2.28824700  | -2.02513900 | H  | 6.08933000  | 1.39773200  | 1.88474600  |
| C | 1.33339300  | 2.45274500  | 3.58686900  | C  | 3.75705300  | 2.72996300  | 0.99422200  |
| H | 0.87488600  | 1.97366700  | 4.47050800  | H  | 4.66056300  | 3.35737900  | 0.89063000  |
| H | 1.38130400  | 1.70634300  | 2.77422200  | H  | 3.06110200  | 2.98876800  | 0.17952500  |
| H | 2.36836500  | 2.73433700  | 3.85108900  | H  | 3.27427200  | 3.00083900  | 1.94801200  |
| H | -0.50915600 | 3.33810200  | 2.92677900  | C  | 0.94505100  | -1.52726200 | 3.68364600  |
| C | 5.11194800  | -3.28647100 | -0.31382700 | C  | 1.75255000  | -2.40181100 | 4.66596600  |
| C | 5.32444500  | -4.32444700 | 0.61371000  | H  | 2.41722900  | -3.11281100 | 4.14938900  |
| C | 6.10512300  | -3.04169700 | -1.28813200 | H  | 2.37850000  | -1.76585200 | 5.31683900  |
| C | 6.48656200  | -5.10036000 | 0.58584400  | H  | 1.07205500  | -2.98541000 | 5.31191300  |
| H | 4.55422400  | -4.51387700 | 1.36680300  | C  | 0.26023500  | -4.06819200 | -0.74788600 |
| C | 7.26613400  | -3.81278000 | -1.33184000 | H  | 1.26821700  | -3.65018200 | -0.90835000 |
| H | 5.96087000  | -2.23872300 | -2.01528400 | C  | 4.27534100  | -2.50300200 | -2.51611700 |
| C | 7.46854700  | -4.84811600 | -0.39494700 | C  | 5.39224300  | -3.25208900 | -3.26016100 |
| H | 6.62022700  | -5.89464200 | 1.32380100  | H  | 5.64835800  | -2.76512200 | -4.21731900 |
| H | 8.03779000  | -3.62958100 | -2.08577200 | H  | 6.31352900  | -3.31904000 | -2.65546500 |
| O | 8.63652600  | -5.54342400 | -0.52032800 | H  | 5.06308000  | -4.27935300 | -3.49526600 |
| C | 8.88349500  | -6.59264200 | 0.42028600  | C  | -0.64331900 | -3.52941800 | -1.87167500 |
| H | 8.11434500  | -7.38478900 | 0.35758900  | H  | -0.69502600 | -2.42689500 | -1.83900600 |
| H | 9.86174800  | -7.01331100 | 0.14474000  | H  | -0.24639200 | -3.82725500 | -2.85826600 |
| H | 8.92955500  | -6.20664800 | 1.45549300  | H  | -1.67279200 | -3.92143100 | -1.78896800 |
| O | 3.84466900  | -1.48907900 | -1.20016700 | C  | 0.38078300  | -5.60201800 | -0.80995300 |
| C | 1.71776100  | -1.93602800 | 0.60147800  | H  | 0.78007100  | -5.91532800 | -1.79095500 |
| C | 1.79309700  | -0.63680900 | -0.18721100 | H  | 1.05867900  | -5.98429600 | -0.02665500 |
| C | 2.83547200  | -0.51561800 | -1.03140400 | H  | -0.60107400 | -6.09015200 | -0.67594700 |
| H | 3.05688400  | 0.33613200  | -1.67994100 | C  | 0.12120900  | -0.50051800 | 4.47923600  |
| H | 0.89812900  | -2.57705900 | 0.20933800  | H  | -0.57420600 | 0.05681800  | 3.83573300  |
| H | 1.43549400  | -1.73802500 | 1.65409200  | H  | -0.46348500 | -0.98253300 | 5.28299900  |

### TS2\_5exo\_NTf2

|   |             |             |             |
|---|-------------|-------------|-------------|
| N | -3.76854100 | 0.71956900  | -3.05994100 |
| C | -3.60031300 | 0.00208800  | -2.00228100 |
| C | 2.17162000  | -1.45326000 | 0.19069200  |
| C | 4.08928600  | -2.48091700 | 0.87842800  |
| C | 3.04289300  | -3.10590700 | 1.49757900  |
| H | 5.16061400  | -2.65930900 | 0.91577200  |
| H | 3.01285500  | -3.95192700 | 2.17780700  |
| N | 1.88200100  | -2.45697300 | 1.07836400  |
| N | 3.53701700  | -1.47742400 | 0.08623800  |

|   |             |             |             |
|---|-------------|-------------|-------------|
| H | -6.17888800 | -0.31916300 | -2.65104100 |
| C | -5.15545300 | -2.33476200 | 0.52135700  |
| H | -3.19001100 | -1.50384300 | 0.24610600  |
| C | -6.48306000 | -2.40295200 | 0.04477000  |
| H | -7.87517900 | -1.70725800 | -1.48842700 |
| H | -4.88688500 | -2.90617000 | 1.41461800  |
| O | -7.32514500 | -3.19780600 | 0.75852100  |
| C | -8.68606400 | -3.29076300 | 0.31948800  |
| H | -8.75305900 | -3.70365400 | -0.70355600 |
| H | -9.17627400 | -3.97883200 | 1.02323200  |
| H | -9.18968200 | -2.30752800 | 0.35678800  |
| O | -2.30008900 | -0.01170800 | -1.46834700 |
| C | -2.46291400 | 1.31624900  | -3.34998400 |
| C | -1.53162500 | 0.79709100  | -2.27647400 |
| C | -0.22067100 | 1.05305300  | -1.97704100 |
| H | 0.26086200  | 1.69365300  | -2.73279400 |
| H | -0.28658600 | 1.94353000  | -0.83790700 |
| H | -2.12179100 | 1.04478300  | -4.36672400 |
| H | -2.51246200 | 2.42182900  | -3.31528200 |
| N | -0.37685900 | 2.91540800  | -0.00405600 |
| S | -0.44406100 | 2.59458900  | 1.63894500  |
| S | -0.81524400 | 4.38019800  | -0.68042900 |
| O | -1.75496300 | 5.17180600  | 0.13253500  |
| O | -1.07683400 | 4.12033200  | -2.11090600 |
| C | 0.84669300  | 5.26300900  | -0.62203700 |
| F | 0.69151100  | 6.52044700  | -1.06648800 |
| F | 1.31350800  | 5.28265700  | 0.63770700  |
| F | 1.72025800  | 4.61260200  | -1.41153600 |
| O | 0.65079400  | 1.65990600  | 1.96015100  |
| O | -0.67394800 | 3.80640300  | 2.44616200  |
| C | -2.03761000 | 1.56790800  | 1.73813400  |
| F | -2.95307600 | 2.04617000  | 0.88176800  |
| F | -1.76423800 | 0.28583300  | 1.44270500  |
| F | -2.51275700 | 1.64056000  | 2.99379300  |

### TS2\_6endo\_NTF2

|    |             |             |             |
|----|-------------|-------------|-------------|
| N  | -2.84560000 | 2.07331500  | 0.76673800  |
| C  | -3.27780900 | 2.20330400  | -0.43202400 |
| C  | 0.38199800  | -2.39296400 | 0.50299700  |
| C  | -0.13685100 | -4.43014500 | 1.38679800  |
| C  | 1.03785300  | -4.56547300 | 0.69741700  |
| H  | -0.72825200 | -5.14581000 | 1.95177800  |
| H  | 1.68507500  | -5.42293600 | 0.53313000  |
| N  | 1.33668200  | -3.31131100 | 0.16495700  |
| N  | -0.51951800 | -3.09948600 | 1.25439900  |
| Au | 0.09623300  | -0.44260700 | 0.06622600  |
| C  | -1.70399500 | -2.48622200 | 1.81011000  |
| C  | -1.61207800 | -1.88945500 | 3.08763300  |
| C  | -2.87540300 | -2.44690000 | 1.02016400  |
| C  | -2.75947500 | -1.24105200 | 3.57895000  |
| C  | -3.99165300 | -1.78125900 | 1.55785100  |
| C  | -3.93502900 | -1.18363200 | 2.82174100  |
| H  | -2.72219800 | -0.75807200 | 4.56055500  |
| H  | -4.91001200 | -1.71125100 | 0.96606400  |
| H  | -4.81182300 | -0.65957300 | 3.21596900  |
| C  | 2.50199400  | -3.01822200 | -0.63542900 |
| C  | 3.67287400  | -2.57740200 | 0.02115200  |
| C  | 2.41171300  | -3.17873400 | -2.03621500 |
| C  | 4.79105900  | -2.29249400 | -0.78349400 |
| C  | 3.56225800  | -2.88900700 | -2.79178400 |
| C  | 4.73927100  | -2.45185700 | -2.17327300 |
| H  | 5.71181400  | -1.93394300 | -0.31375800 |
| H  | 3.52961600  | -2.99409200 | -3.88058400 |

|   |              |             |             |
|---|--------------|-------------|-------------|
| H | 5.62167600   | -2.22380900 | -2.78033600 |
| C | -2.94441500  | -3.04943100 | -0.37742300 |
| H | -1.97058100  | -3.51979100 | -0.59920400 |
| C | -4.01991300  | -4.14778900 | -0.46349700 |
| H | -4.02576200  | -4.59910600 | -1.47142500 |
| H | -3.83719500  | -4.95174700 | 0.27097100  |
| H | -5.02841100  | -3.73906900 | -0.27401000 |
| C | -3.18045500  | -1.95346200 | -1.43372500 |
| H | -4.15467200  | -1.45470800 | -1.28635100 |
| H | -2.39419900  | -1.18015900 | -1.38005900 |
| H | -3.17317100  | -2.38895000 | -2.44881500 |
| C | 1.10930100   | -3.57411100 | -2.72038900 |
| C | 1.30764700   | -4.65858800 | -3.79198600 |
| H | 1.81514900   | -5.54803700 | -3.37981900 |
| H | 0.32917900   | -4.97719800 | -4.19193600 |
| H | 1.90609500   | -4.28940800 | -4.64325000 |
| C | 3.71677200   | -2.35477600 | 1.52774300  |
| H | 2.84436300   | -2.86490100 | 1.97310900  |
| C | -0.31947200  | -1.88391900 | 3.89395100  |
| C | -0.51557200  | -2.50034500 | 5.29052800  |
| H | -1.22283300  | -1.90932400 | 5.89892200  |
| H | -0.90406000  | -3.53196000 | 5.22639400  |
| H | 0.44535600   | -2.53052700 | 5.83361800  |
| C | 3.58326300   | -0.85192000 | 1.84470000  |
| H | 2.65274000   | -0.43781500 | 1.41943800  |
| H | 3.56290800   | -0.68640600 | 2.93637600  |
| H | 4.43157700   | -0.28083400 | 1.42986200  |
| C | 4.97747900   | -2.94947700 | 2.17694000  |
| H | 4.92436900   | -2.83692000 | 3.27390300  |
| H | 5.08494700   | -4.02408700 | 1.94752500  |
| H | 5.89485400   | -2.43602400 | 1.83934300  |
| C | 0.43036000   | -2.32305000 | -3.31487800 |
| H | 0.23377800   | -1.56942900 | -2.53079000 |
| H | 1.07033700   | -1.85658500 | -4.08518700 |
| H | -0.53285000  | -2.59113300 | -3.78471000 |
| H | 0.43090600   | -3.98631900 | -1.95276800 |
| C | 0.25131700   | -0.45581500 | 3.98606600  |
| H | 1.21589600   | -0.45777800 | 4.52427400  |
| H | 0.41921900   | -0.03003100 | 2.98219700  |
| H | -0.43826800  | 0.21432600  | 4.53000400  |
| H | 0.42177000   | -2.50282400 | 3.35935100  |
| C | -4.70266300  | 2.15135400  | -0.79976000 |
| C | -5.67367700  | 1.98227500  | 0.20825600  |
| C | -5.13001800  | 2.23256500  | -2.14428400 |
| C | -7.03279900  | 1.89329800  | -0.10259900 |
| H | -5.34141500  | 1.91208100  | 1.24803600  |
| C | -6.48320100  | 2.14966000  | -2.46575800 |
| H | -4.39153000  | 2.35715400  | -2.93991400 |
| C | -7.44688700  | 1.97835100  | -1.44923100 |
| H | -7.76085900  | 1.76126600  | 0.70108300  |
| H | -6.82108700  | 2.21135300  | -3.50451700 |
| O | -8.74227900  | 1.90462900  | -1.86693000 |
| C | -9.74982800  | 1.72196200  | -0.86689900 |
| H | -9.77231400  | 2.56731900  | -0.15479800 |
| H | -10.70387400 | 1.68006600  | -1.41247600 |
| H | -9.60380200  | 0.77640400  | -0.31281800 |
| O | -2.44163000  | 2.34605100  | -1.55891700 |
| C | -1.38819600  | 2.14539400  | 0.94456600  |
| C | -0.63435700  | 1.48683300  | -0.21182300 |
| C | -1.22053700  | 1.70943100  | -1.42104500 |
| H | -0.83690900  | 1.40219800  | -2.39836500 |
| H | 0.86603600   | 1.96661600  | -0.29276100 |
| H | -1.09585400  | 3.21376200  | 1.01941900  |

|   |             |            |             |
|---|-------------|------------|-------------|
| H | -1.13464500 | 1.68450400 | 1.91165700  |
| N | 1.91963100  | 2.51034400 | -0.31989700 |
| S | 2.61800900  | 2.90491800 | 1.15532800  |
| S | 2.66312300  | 2.66218200 | -1.81771600 |
| O | 3.70891500  | 3.69761000 | -1.81047900 |
| O | 1.57551200  | 2.64490200 | -2.81294900 |
| C | 3.54815100  | 1.00575000 | -2.00613500 |
| F | 4.44710300  | 0.84867500 | -1.02582500 |
| F | 2.64295500  | 0.01667700 | -1.96441000 |
| F | 4.16939900  | 0.99469900 | -3.19716900 |
| O | 1.82791300  | 2.20153300 | 2.18214700  |
| O | 4.08888700  | 2.84196300 | 1.11638400  |
| C | 2.15931300  | 4.72917300 | 1.31515700  |
| F | 0.82274400  | 4.85302100 | 1.36972000  |
| F | 2.70123100  | 5.19395800 | 2.45238100  |
| F | 2.63286800  | 5.41901400 | 0.26985100  |

### 2exo

|   |             |             |             |
|---|-------------|-------------|-------------|
| N | 2.09522400  | 1.50227500  | -0.00043000 |
| C | 1.50096100  | 0.35613500  | -0.00050600 |
| C | 0.06177100  | 0.10250100  | -0.00085700 |
| C | -0.83610000 | 1.18875800  | -0.00081200 |
| C | -0.45514000 | -1.21295500 | -0.00100500 |
| C | -2.21676200 | 0.98054200  | -0.00068000 |
| H | -0.43661000 | 2.20711700  | -0.00080500 |
| C | -1.83006600 | -1.43133300 | -0.00086900 |
| H | 0.23048800  | -2.06436800 | -0.00108100 |
| C | -2.72317800 | -0.33747900 | -0.00051800 |
| H | -2.89006700 | 1.84024800  | -0.00063400 |
| H | -2.24157200 | -2.44485900 | -0.00082200 |
| O | -4.04638100 | -0.65664200 | 0.00006500  |
| C | -4.98839400 | 0.42136700  | 0.00240900  |
| H | -4.88499500 | 1.04925400  | -0.90159300 |
| H | -5.98094100 | -0.05214000 | 0.00543400  |
| H | -4.87976500 | 1.04984100  | 0.90536000  |
| O | 2.31351500  | -0.77635700 | -0.00002400 |
| C | 3.53411200  | 1.21296500  | 0.00029600  |
| C | 3.62843800  | -0.30380300 | 0.00045600  |
| C | 4.67379300  | -1.14127100 | 0.00094300  |
| H | 5.69113900  | -0.74307200 | 0.00135000  |
| H | 4.53840700  | -2.22588300 | 0.00099700  |
| H | 4.01831200  | 1.66259200  | -0.88720000 |
| H | 4.01736700  | 1.66268800  | 0.88827000  |

### 2endo

|   |             |             |             |
|---|-------------|-------------|-------------|
| N | -2.16399600 | -1.24354300 | -0.00002100 |
| C | -1.58832700 | -0.09674800 | 0.00007400  |
| C | -0.11881500 | 0.04785800  | 0.00005800  |
| C | 0.69391500  | -1.10273600 | -0.00000100 |
| C | 0.50533200  | 1.31590000  | 0.00010300  |
| C | 2.08734500  | -1.00710800 | -0.00001700 |
| H | 0.21146900  | -2.08425300 | -0.00003500 |
| C | 1.89428700  | 1.42487500  | 0.00009200  |
| H | -0.10664000 | 2.22113300  | 0.00014500  |
| C | 2.69869400  | 0.26536500  | 0.00003200  |
| H | 2.68820400  | -1.91951500 | -0.00006700 |
| H | 2.38338800  | 2.40362400  | 0.00013000  |
| O | 4.04494100  | 0.47861700  | 0.00003100  |
| C | 4.89630800  | -0.67142200 | 0.00001400  |
| H | 4.74034900  | -1.28980600 | -0.90311800 |
| H | 5.92429800  | -0.28018000 | 0.00006200  |
| H | 4.74029400  | -1.28988300 | 0.90308300  |

|   |             |             |             |
|---|-------------|-------------|-------------|
| O | -2.21545900 | 1.14893200  | 0.00017600  |
| C | -3.62510100 | -1.34198400 | 0.00006000  |
| C | -4.31923500 | -0.00639700 | -0.00027100 |
| C | -3.60313400 | 1.12435800  | -0.00020300 |
| H | -5.41177500 | 0.04814200  | -0.00061700 |
| H | -4.00631800 | 2.13970900  | -0.00045200 |
| H | -3.93037800 | -1.94781200 | -0.87917300 |
| H | -3.93031000 | -1.94736500 | 0.87963000  |

### HClO<sub>4</sub>

|    |             |             |             |
|----|-------------|-------------|-------------|
| O  | 0.41832100  | 0.78170400  | -1.23729000 |
| O  | 0.41826900  | 0.78124100  | 1.23762100  |
| O  | 0.67247300  | -1.36286900 | -0.00022500 |
| Cl | 0.15239200  | 0.01377800  | 0.00001700  |
| O  | -1.53926100 | -0.30022200 | -0.00008500 |
| H  | -1.96280300 | 0.60187800  | -0.00001000 |

### IPrAuClO<sub>4</sub>

|    |             |             |             |
|----|-------------|-------------|-------------|
| C  | -0.01134500 | -0.85951400 | 0.46873800  |
| C  | 0.69175400  | -2.49232900 | 1.88414300  |
| C  | -0.67700300 | -2.50186900 | 1.89145300  |
| H  | 1.42250900  | -3.09896600 | 2.41235400  |
| H  | -1.39376800 | -3.11928500 | 2.42626400  |
| N  | -1.08708200 | -1.49641900 | 1.02163100  |
| N  | 1.07900500  | -1.48206300 | 1.00942500  |
| Au | -0.02986300 | 0.63045200  | -0.81145500 |
| C  | 2.44344900  | -1.11242500 | 0.71697100  |
| C  | 3.09023100  | -1.74315300 | -0.36829600 |
| C  | 3.05500100  | -0.12383700 | 1.51954500  |
| C  | 4.41507700  | -1.35580300 | -0.63772600 |
| C  | 4.38137200  | 0.22452400  | 1.20663000  |
| C  | 5.05476200  | -0.38487600 | 0.14157700  |
| H  | 4.94602300  | -1.81538500 | -1.47743500 |
| H  | 4.88682000  | 0.99207000  | 1.80158700  |
| H  | 6.08504500  | -0.09473900 | -0.08864200 |
| C  | -2.45841200 | -1.14900800 | 0.73544000  |
| C  | -3.10076000 | -1.79582100 | -0.34303300 |
| C  | -3.07977500 | -0.16250100 | 1.53305700  |
| C  | -4.43054900 | -1.42591900 | -0.61260300 |
| C  | -4.41001000 | 0.16964800  | 1.21861500  |
| C  | -5.07884100 | -0.45509500 | 0.15956300  |
| H  | -4.95828700 | -1.89875500 | -1.44698900 |
| H  | -4.92302200 | 0.93599400  | 1.80835100  |
| H  | -6.11251700 | -0.17750400 | -0.07093800 |
| C  | 2.32587100  | 0.56054100  | 2.66852800  |
| H  | 1.30009000  | 0.15555300  | 2.71477500  |
| C  | 3.00466500  | 0.25516700  | 4.01637300  |
| H  | 2.44937100  | 0.73340900  | 4.84236000  |
| H  | 3.04181000  | -0.83104800 | 4.21194600  |
| H  | 4.04017600  | 0.63832700  | 4.04021900  |
| C  | 2.21072200  | 2.07681600  | 2.42809900  |
| H  | 3.20397100  | 2.55981100  | 2.41587700  |
| H  | 1.71713000  | 2.29683200  | 1.46550600  |
| H  | 1.61883200  | 2.54689700  | 3.23350600  |
| C  | -2.35356200 | 0.54733100  | 2.66896300  |
| C  | -3.09429300 | 0.37748100  | 4.00769300  |
| H  | -3.22858300 | -0.68792100 | 4.26409300  |
| H  | -2.52344900 | 0.85746300  | 4.82186800  |
| H  | -4.09342700 | 0.84696900  | 3.97936300  |

|    |             |             |             |   |             |             |             |
|----|-------------|-------------|-------------|---|-------------|-------------|-------------|
| C  | -2.39042000 | -2.81963300 | -1.21912500 | H | 0.13383700  | 4.70183800  | 3.16770700  |
| H  | -1.39289900 | -3.01130100 | -0.78717700 | H | 1.91165200  | 4.88171200  | 3.16961000  |
| C  | 2.38912100  | -2.76727400 | -1.25123800 | H | 0.93741000  | 5.52791100  | 1.81754300  |
| C  | 3.15617400  | -4.09990400 | -1.30496700 | C | -0.07253300 | 3.12685400  | 0.87343400  |
| H  | 4.15606800  | -3.97549000 | -1.75673500 | H | -0.10335000 | 3.89043700  | 0.07847500  |
| H  | 3.29090200  | -4.52919900 | -0.29676400 | H | -0.03926600 | 2.13863400  | 0.38113200  |
| H  | 2.60250700  | -4.83273700 | -1.91793400 | H | -1.01781600 | 3.18975500  | 1.44118500  |
| C  | -2.17632500 | -2.25733100 | -2.63707900 | C | -1.48877100 | -0.58759300 | 2.75451400  |
| H  | -1.61407400 | -1.30695600 | -2.60504800 | C | -1.60599400 | -0.69133200 | 4.28749100  |
| H  | -1.60691200 | -2.97487100 | -3.25432600 | H | -0.64150300 | -0.95414900 | 4.75629200  |
| H  | -3.14019800 | -2.06446300 | -3.14088300 | H | -1.94346300 | 0.26953900  | 4.71536000  |
| C  | -3.14112800 | -4.16214700 | -1.25636300 | H | -2.34051800 | -1.46632200 | 4.57138000  |
| H  | -2.58075600 | -4.89442500 | -1.86387500 | C | 2.29320900  | -3.44060300 | 0.75028900  |
| H  | -3.26716900 | -4.58279300 | -0.24340000 | H | 2.84444900  | -2.52100000 | 1.01454900  |
| H  | -4.14411000 | -4.05450500 | -1.70561400 | C | 4.99235600  | 0.35704100  | 0.18426200  |
| C  | -2.13826100 | 2.03599600  | 2.33647000  | C | 6.40653500  | 0.43379400  | 0.78835800  |
| H  | -1.56647100 | 2.16318900  | 1.40084600  | H | 7.05865700  | 1.10699800  | 0.20416000  |
| H  | -3.10159400 | 2.56256300  | 2.21644900  | H | 6.37964100  | 0.80540200  | 1.82749800  |
| H  | -1.57967000 | 2.53249500  | 3.14995000  | H | 6.87456500  | -0.56621800 | 0.79263900  |
| H  | -1.35673400 | 0.08642900  | 2.78179600  | C | 2.39889200  | -3.61600200 | -0.77502100 |
| C  | 2.16238300  | -2.19366200 | -2.66266200 | H | 1.95487100  | -2.75039300 | -1.29726000 |
| H  | 1.59795600  | -2.91133500 | -3.28432800 | H | 3.45693800  | -3.70414000 | -1.08082000 |
| H  | 1.59044100  | -1.24959000 | -2.61859900 | H | 1.86585100  | -4.52076800 | -1.11541900 |
| H  | 3.12191700  | -1.98550000 | -3.16873900 | C | 2.96362300  | -4.60804700 | 1.49728800  |
| H  | 1.39582400  | -2.97551600 | -0.81692900 | H | 4.02659900  | -4.68874900 | 1.20841200  |
| O  | -0.06089500 | 2.12735000  | -2.25424400 | H | 2.91624800  | -4.46533700 | 2.59109600  |
| Cl | 0.07038100  | 3.63678400  | -1.69058800 | H | 2.47733600  | -5.57067300 | 1.26021700  |
| O  | 1.36314200  | 3.74409100  | -0.94716600 | C | -2.81980900 | -0.13641700 | 2.12862300  |
| O  | -1.09976600 | 3.90168000  | -0.79952900 | H | -2.76299000 | -0.13897500 | 1.02914500  |
| O  | 0.05068600  | 4.47790500  | -2.91742500 | H | -3.65584800 | -0.79398200 | 2.42672800  |

### Int1\_CIO4

|    |             |             |             |   |             |             |             |
|----|-------------|-------------|-------------|---|-------------|-------------|-------------|
| N  | -1.89276000 | 1.43547400  | -2.61898500 | H | 5.02931800  | -0.19145500 | -1.25371800 |
| C  | -2.45737300 | 2.40049900  | -1.82424900 | H | 5.49544000  | -1.19262000 | -1.27073700 |
| C  | 1.61465900  | -0.07073300 | 0.97721600  | H | 4.00956700  | -0.27776400 | -1.66952200 |
| C  | 2.67957800  | 0.42120700  | 2.92509600  | H | 5.61441600  | 0.46678900  | -1.92022300 |
| C  | 1.91566400  | -0.69550800 | 3.13975700  | H | 4.41039300  | -0.35482300 | 0.79530400  |
| H  | 3.33762300  | 0.98382900  | 3.58203900  | C | -3.67702300 | 2.00328900  | -1.05548600 |
| H  | 1.77237600  | -1.31188100 | 4.02301700  | C | -4.36564800 | 0.78757600  | -1.23151300 |
| N  | 1.27097700  | -0.97672600 | 1.94200600  | C | -4.13349600 | 2.89711000  | -0.06183400 |
| N  | 2.48107300  | 0.78609600  | 1.60029500  | C | -5.45767400 | 0.45124300  | -0.42300400 |
| Au | 1.10727000  | -0.02014200 | -0.98203100 | H | -4.06912200 | 0.07311300  | -2.00513000 |
| C  | 3.09425000  | 1.91895500  | 0.94698200  | C | -5.21638200 | 2.57555700  | 0.75088000  |
| C  | 4.29766200  | 1.71169200  | 0.23935000  | H | -3.60490500 | 3.84670300  | 0.06219500  |
| C  | 2.44217100  | 3.17077200  | 1.03562200  | C | -5.88025700 | 1.33934100  | 0.58608100  |
| C  | 4.84697800  | 2.82292500  | -0.42713700 | H | -5.96014400 | -0.50533700 | -0.58203700 |
| C  | 3.03490300  | 4.24560300  | 0.34948500  | H | -5.56582100 | 3.25903600  | 1.53076900  |
| C  | 4.21960400  | 4.07227300  | -0.37816200 | O | -6.91215700 | 1.10269800  | 1.44476000  |
| H  | 5.77656300  | 2.70125000  | -0.99245900 | C | -7.56542300 | -0.16804500 | 1.35441700  |
| H  | 2.56222500  | 5.23132700  | 0.38269900  | H | -6.85676600 | -0.99856200 | 1.52927600  |
| H  | 4.66037800  | 4.92338700  | -0.90746100 | H | -8.32917000 | -0.16521300 | 2.14602100  |
| C  | 0.35279400  | -2.07755800 | 1.75599700  | H | -8.05725500 | -0.30359500 | 0.37362600  |
| C  | 0.84151000  | -3.26952100 | 1.18091300  | O | -1.96633800 | 3.54484500  | -1.73420700 |
| C  | -0.98869700 | -1.89913500 | 2.16155000  | C | -0.61445400 | 1.67481800  | -3.25455100 |
| C  | -0.07731300 | -4.32079700 | 1.01143600  | C | 0.33870200  | 0.57701000  | -3.01633100 |
| C  | -1.85630300 | -2.99143700 | 1.99227700  | C | 1.09042700  | -0.41757800 | -3.10091300 |
| C  | -1.40868400 | -4.18693500 | 1.41922200  | H | 1.63104000  | -1.26470700 | -3.50171400 |
| H  | 0.25985800  | -5.25524500 | 0.55173300  | H | -2.23949200 | 0.46646800  | -2.64265200 |
| H  | -2.90550700 | -2.89214100 | 2.28611300  | H | -0.71157300 | 1.77011600  | -4.35579200 |
| H  | -2.10876500 | -5.01539600 | 1.27277600  | H | -0.23516000 | 2.63903200  | -2.87144000 |
| C  | 1.13674200  | 3.33613200  | 1.80657500  | O | -2.54013000 | -1.34264800 | -3.21921600 |
| H  | 1.10108300  | 2.54821300  | 2.58083500  | O | -3.16204000 | -3.13293800 | -1.63118000 |
| C  | 1.03377100  | 4.68906900  | 2.52875900  | O | -1.65834100 | -1.30748500 | -0.92190100 |

|    |             |             |             |
|----|-------------|-------------|-------------|
| Cl | -2.05087800 | -2.21792300 | -2.06137400 |
| O  | -0.86211400 | -3.01834700 | -2.52258500 |

### TS1\_5exo\_CIO4

|    |             |             |             |
|----|-------------|-------------|-------------|
| N  | -3.07987300 | -0.00675300 | -1.07467100 |
| C  | -3.66410100 | -1.07929300 | -1.67346200 |
| C  | 2.62995400  | 0.20549000  | 0.47716400  |
| C  | 3.70002900  | 1.65206000  | 1.86318000  |
| C  | 4.34205700  | 0.44583900  | 1.94917400  |
| H  | 3.88339500  | 2.60444900  | 2.35376700  |
| H  | 5.20157000  | 0.12432600  | 2.53139700  |
| N  | 3.67340400  | -0.42405400 | 1.09081800  |
| N  | 2.65480800  | 1.48286400  | 0.96011800  |
| Au | 1.28896200  | -0.54644500 | -0.82920000 |
| C  | 1.71291900  | 2.49372600  | 0.53713000  |
| C  | 1.96374200  | 3.16655900  | -0.67863300 |
| C  | 0.55909400  | 2.71137400  | 1.32708000  |
| C  | 0.99099000  | 4.08583400  | -1.11509000 |
| C  | -0.38102200 | 3.63722600  | 0.84122800  |
| C  | -0.17050800 | 4.31051600  | -0.36973500 |
| H  | 1.14809500  | 4.62272000  | -2.05639100 |
| H  | -1.30138100 | 3.82333200  | 1.40073800  |
| H  | -0.93090100 | 5.00824900  | -0.73374900 |
| C  | 4.01590900  | -1.80852300 | 0.86744500  |
| C  | 4.99095800  | -2.10555200 | -0.11251200 |
| C  | 3.34495900  | -2.79578900 | 1.62203600  |
| C  | 5.29256900  | -3.46255800 | -0.32462000 |
| C  | 3.68741300  | -4.13730700 | 1.36961700  |
| C  | 4.64949700  | -4.46732200 | 0.40919800  |
| H  | 6.03516300  | -3.73629300 | -1.08010800 |
| H  | 3.18713800  | -4.93058000 | 1.93421100  |
| H  | 4.89917100  | -5.51769200 | 0.22714300  |
| C  | 0.31130800  | 1.93245100  | 2.61486800  |
| H  | 1.29229300  | 1.60955900  | 3.00895200  |
| C  | -0.36936300 | 2.78001600  | 3.70292900  |
| H  | -0.41356600 | 2.20867200  | 4.64667500  |
| H  | 0.18116100  | 3.71737800  | 3.89536200  |
| H  | -1.40626200 | 3.03952700  | 3.42844000  |
| C  | -0.51840100 | 0.66250200  | 2.32896100  |
| H  | -1.53004800 | 0.92996200  | 1.97665500  |
| H  | -0.04058800 | 0.02891300  | 1.56000800  |
| H  | -0.62781700 | 0.06131700  | 3.24958900  |
| C  | 2.28676500  | -2.45604800 | 2.66359400  |
| C  | 2.72555200  | -2.90684600 | 4.06894700  |
| H  | 3.68234700  | -2.43998600 | 4.36101100  |
| H  | 1.96317100  | -2.62313300 | 4.81544700  |
| H  | 2.85432400  | -4.00248800 | 4.11795400  |
| C  | 5.64023600  | -1.01442100 | -0.95574100 |
| H  | 5.47976300  | -0.04766200 | -0.44677300 |
| C  | 3.21927300  | 2.92950700  | -1.50912900 |
| C  | 4.07478600  | 4.20765500  | -1.58931000 |
| H  | 3.52642700  | 5.02633000  | -2.08763400 |
| H  | 4.36732600  | 4.55928600  | -0.58464800 |
| H  | 4.99590800  | 4.01757700  | -2.16804300 |
| C  | 4.94945100  | -0.93354200 | -2.33218100 |
| H  | 3.86380300  | -0.75838600 | -2.22413800 |
| H  | 5.37623700  | -0.11079800 | -2.93273000 |
| H  | 5.08596000  | -1.87459000 | -2.89457200 |
| C  | 7.15861300  | -1.20069900 | -1.10987800 |
| H  | 7.58837200  | -0.34178700 | -1.65423800 |
| H  | 7.66046100  | -1.26957300 | -0.12915400 |
| H  | 7.40784100  | -2.11014900 | -1.68385600 |
| C  | 0.92312100  | -3.06326500 | 2.28444600  |

|    |              |             |             |
|----|--------------|-------------|-------------|
| H  | 0.59728200   | -2.72294300 | 1.28512500  |
| H  | 0.96276100   | -4.16695200 | 2.27084200  |
| H  | 0.15312700   | -2.76242300 | 3.01606000  |
| H  | 2.16348800   | -1.35978400 | 2.69091200  |
| C  | 2.86747700   | 2.40635700  | -2.91333600 |
| H  | 3.78696400   | 2.19265300  | -3.48637300 |
| H  | 2.27402200   | 1.47642300  | -2.85254600 |
| H  | 2.27998500   | 3.14716400  | -3.48366200 |
| H  | 3.82790500   | 2.15441700  | -1.01127900 |
| C  | -4.98361600  | -1.54983100 | -1.18051400 |
| C  | -5.80035700  | -0.79872000 | -0.31232100 |
| C  | -5.44564700  | -2.80813500 | -1.62823100 |
| C  | -7.03950300  | -1.28876900 | 0.11265500  |
| H  | -5.49247000  | 0.18974000  | 0.04044600  |
| C  | -6.67429700  | -3.30767900 | -1.21021000 |
| H  | -4.81476600  | -3.38466200 | -2.31088500 |
| C  | -7.48311200  | -2.55096800 | -0.33222400 |
| H  | -7.65119000  | -0.67944200 | 0.78137200  |
| H  | -7.03604400  | -4.28347100 | -1.54800000 |
| O  | -8.66716800  | -3.12237600 | 0.02016200  |
| C  | -9.51774600  | -2.38875900 | 0.90974100  |
| H  | -9.82793600  | -1.42438000 | 0.46765000  |
| H  | -10.40343700 | -3.02279900 | 1.06107400  |
| H  | -9.02463700  | -2.20883200 | 1.88251100  |
| O  | -3.06106800  | -1.64391400 | -2.62313900 |
| C  | -1.85219700  | 0.47447200  | -1.67645800 |
| C  | -0.94589900  | -0.64023700 | -1.98851900 |
| C  | -0.01431900  | -1.46588100 | -2.19637600 |
| H  | 0.21910700   | -2.39068500 | -2.71769200 |
| H  | -3.44518000  | 0.48465300  | -0.24135400 |
| H  | -2.05129800  | 1.02793300  | -2.61665200 |
| H  | -1.37280500  | 1.18325400  | -0.98133000 |
| O  | -3.80168700  | 1.45772500  | 1.26709100  |
| O  | -3.42059400  | 3.17472900  | -0.46919100 |
| O  | -3.66638300  | 3.83587400  | 1.90368500  |
| Cl | -4.13482400  | 2.89137300  | 0.82801400  |
| O  | -5.62084400  | 3.00591000  | 0.64247300  |

### TS1\_6endo\_CIO4

|    |             |             |             |
|----|-------------|-------------|-------------|
| N  | -3.19730000 | 0.09680900  | -2.20747600 |
| C  | -3.83941600 | -1.02770300 | -1.78929100 |
| C  | 2.42088500  | -0.14661000 | 0.46044400  |
| C  | 4.24978600  | 0.75278000  | 1.46731400  |
| C  | 4.34148100  | -0.60648600 | 1.59412700  |
| H  | 4.90128100  | 1.55587800  | 1.80133400  |
| H  | 5.08671300  | -1.24011000 | 2.06769500  |
| N  | 3.21731800  | -1.13688000 | 0.96842000  |
| N  | 3.06974900  | 1.01271000  | 0.77455600  |
| Au | 0.71846900  | -0.47089200 | -0.58362000 |
| C  | 2.56934300  | 2.33551300  | 0.48116800  |
| C  | 2.82908700  | 2.88829200  | -0.79150400 |
| C  | 1.84626900  | 3.01050900  | 1.49094800  |
| C  | 2.32093500  | 4.17471400  | -1.04719400 |
| C  | 1.35699800  | 4.29087400  | 1.17923900  |
| C  | 1.58785000  | 4.86492400  | -0.07609800 |
| H  | 2.49339400  | 4.63196800  | -2.02630200 |
| H  | 0.76744100  | 4.83519600  | 1.92263100  |
| H  | 1.18527900  | 5.85747900  | -0.30115500 |
| C  | 2.85723400  | -2.53309600 | 0.91728700  |
| C  | 3.36686800  | -3.32435200 | -0.13655200 |
| C  | 1.97353100  | -3.02574300 | 1.90415300  |
| C  | 2.96729300  | -4.67255900 | -0.17598400 |
| C  | 1.59952700  | -4.37893600 | 1.81118900  |

|   |              |             |             |
|---|--------------|-------------|-------------|
| C | 2.09216400   | -5.19363600 | 0.78510000  |
| H | 3.33464300   | -5.31865700 | -0.97908200 |
| H | 0.91294300   | -4.79648700 | 2.55442900  |
| H | 1.78916300   | -6.24446300 | 0.73173300  |
| C | 1.57210400   | 2.38139200  | 2.85270200  |
| H | 2.17467600   | 1.46012100  | 2.93531500  |
| C | 1.99939300   | 3.30264600  | 4.00889600  |
| H | 1.85776700   | 2.78577100  | 4.97456600  |
| H | 3.06240800   | 3.59006500  | 3.92782200  |
| H | 1.39880700   | 4.22899500  | 4.04024500  |
| C | 0.09220500   | 1.97383100  | 2.97926700  |
| H | -0.57299900  | 2.85031300  | 2.89088200  |
| H | -0.20363400  | 1.26743400  | 2.18683800  |
| H | -0.08945000  | 1.49810200  | 3.96031300  |
| C | 1.43372400   | -2.14981300 | 3.02873100  |
| C | 1.89782100   | -2.66318000 | 4.40430400  |
| H | 2.99907100   | -2.68413600 | 4.47919500  |
| H | 1.51284300   | -2.00791900 | 5.20522900  |
| H | 1.52685800   | -3.68538800 | 4.59852500  |
| C | 4.25627400   | -2.73673800 | -1.22625500 |
| H | 4.59476500   | -1.74063600 | -0.89117900 |
| C | 3.60375900   | 2.13289200  | -1.86381400 |
| C | 4.78961200   | 2.95409400  | -2.40073100 |
| H | 4.44935000   | 3.86838100  | -2.91794200 |
| H | 5.47049100   | 3.25861800  | -1.58685400 |
| H | 5.36852300   | 2.35733600  | -3.12743600 |
| C | 3.44835200   | -2.54022200 | -2.52464000 |
| H | 2.56132400   | -1.90429400 | -2.35137500 |
| H | 4.07269500   | -2.06139600 | -3.29974900 |
| H | 3.09608600   | -3.50926800 | -2.92110600 |
| C | 5.51068000   | -3.58948500 | -1.48033600 |
| H | 6.16503500   | -3.09003800 | -2.21599400 |
| H | 6.09167500   | -3.74234000 | -0.55423800 |
| H | 5.25344100   | -4.58269200 | -1.88831600 |
| C | -0.09998000  | -2.03570800 | 2.96541900  |
| H | -0.42867100  | -1.61953300 | 1.99686500  |
| H | -0.58833000  | -3.01706600 | 3.10109900  |
| H | -0.46562100  | -1.36548200 | 3.76287300  |
| H | 1.84015800   | -1.13188600 | 2.89986000  |
| C | 2.66582700   | 1.69996400  | -3.00591200 |
| H | 3.21760200   | 1.11050600  | -3.75999000 |
| H | 1.83623900   | 1.07901100  | -2.61991700 |
| H | 2.22282800   | 2.57724700  | -3.51013600 |
| H | 4.01744900   | 1.21633600  | -1.40781500 |
| C | -5.15019000  | -0.86914900 | -1.09844000 |
| C | -5.57039100  | 0.32171500  | -0.47307900 |
| C | -5.99483700  | -2.00040400 | -1.03473300 |
| C | -6.80345300  | 0.39083300  | 0.18578400  |
| H | -4.93542400  | 1.21371500  | -0.46372900 |
| C | -7.22718600  | -1.94087800 | -0.39308100 |
| H | -5.66012800  | -2.92963300 | -1.50453800 |
| C | -7.64271700  | -0.74068000 | 0.22566200  |
| H | -7.09535200  | 1.32383200  | 0.67280800  |
| H | -7.88886300  | -2.81123500 | -0.35018500 |
| O | -8.85893200  | -0.78066900 | 0.83670600  |
| C | -9.30567300  | 0.40733200  | 1.50025100  |
| H | -9.41806200  | 1.24882300  | 0.79236900  |
| H | -10.28809700 | 0.15559700  | 1.92565300  |
| H | -8.61577600  | 0.69915600  | 2.31308700  |
| O | -3.34729700  | -2.17555700 | -1.98573900 |
| C | -1.81894000  | 0.06146500  | -2.66587600 |
| C | -0.99147000  | -0.79682600 | -1.74240100 |
| C | -1.21355000  | -1.92459600 | -1.20995800 |

|    |             |             |             |
|----|-------------|-------------|-------------|
| H  | -1.20201500 | -2.86097500 | -0.67216800 |
| H  | -3.53020000 | 1.02508800  | -1.90337000 |
| H  | -1.75645000 | -0.39242100 | -3.67152500 |
| H  | -1.44595600 | 1.09234700  | -2.70776600 |
| O  | -3.44588300 | 2.82510900  | -1.21283300 |
| O  | -2.27486800 | 4.00506200  | 0.61886000  |
| O  | -0.98368100 | 2.80905000  | -1.11220800 |
| O  | -2.30730400 | 1.53345100  | 0.55004600  |
| Cl | -2.23575000 | 2.79543500  | -0.27035700 |

### Int2\_Sexo\_CIO4

|    |             |             |             |
|----|-------------|-------------|-------------|
| N  | 3.41610900  | -0.20866800 | 0.47046500  |
| C  | 3.79049700  | -1.45730300 | 0.26767600  |
| C  | -2.82965300 | 0.49455700  | 0.09556500  |
| C  | -3.88785800 | 2.51079400  | 0.25363100  |
| C  | -4.82776900 | 1.57955200  | -0.09737800 |
| H  | -3.96212600 | 3.58018800  | 0.43297900  |
| H  | -5.89375700 | 1.66577700  | -0.29082300 |
| N  | -4.16148400 | 0.35921600  | -0.18683600 |
| N  | -2.67902200 | 1.83025800  | 0.36420800  |
| Au | -1.32042400 | -0.86780700 | 0.08854100  |
| C  | -1.41012000 | 2.41700600  | 0.72613000  |
| C  | -1.04810100 | 2.43471300  | 2.09219000  |
| C  | -0.56512300 | 2.89009700  | -0.30308500 |
| C  | 0.21668600  | 2.95970700  | 2.41739900  |
| C  | 0.68948000  | 3.40207400  | 0.07680900  |
| C  | 1.07786000  | 3.43616800  | 1.42121300  |
| H  | 0.53363200  | 2.98077600  | 3.46535000  |
| H  | 1.38779000  | 3.75504100  | -0.68724700 |
| H  | 2.06819800  | 3.82233400  | 1.68160000  |
| C  | -4.76566300 | -0.89906400 | -0.54825700 |
| C  | -5.27006000 | -1.72388200 | 0.48212100  |
| C  | -4.78655100 | -1.26288600 | -1.91300300 |
| C  | -5.81950800 | -2.96191800 | 0.10286100  |
| C  | -5.34928100 | -2.51092400 | -2.23727800 |
| C  | -5.85938200 | -3.35142700 | -1.24124200 |
| H  | -6.21296500 | -3.63317200 | 0.87276600  |
| H  | -5.37696900 | -2.83043900 | -3.28395600 |
| H  | -6.28787700 | -4.32135800 | -1.51431400 |
| C  | -0.94828600 | 2.82004900  | -1.77612200 |
| H  | -1.98263900 | 2.44064200  | -1.84775200 |
| C  | -0.91541600 | 4.21174800  | -2.43268100 |
| H  | -1.23962200 | 4.14547300  | -3.48626800 |
| H  | -1.58425000 | 4.91959100  | -1.91239000 |
| H  | 0.10303900  | 4.63752300  | -2.42228500 |
| C  | -0.03849000 | 1.82825600  | -2.52654500 |
| H  | 1.01959000  | 2.14160200  | -2.48188400 |
| H  | -0.11704200 | 0.81512200  | -2.09185300 |
| H  | -0.33051500 | 1.76822900  | -3.59022500 |
| C  | -4.18893000 | -0.37627500 | -2.99855700 |
| C  | -5.20071000 | -0.07868100 | -4.11879100 |
| H  | -6.11697600 | 0.39110600  | -3.72045900 |
| H  | -4.75745300 | 0.61021700  | -4.85925400 |
| H  | -5.49658600 | -0.99742000 | -4.65525700 |
| C  | -5.18464300 | -1.32727100 | 1.95077500  |
| H  | -4.88659500 | -0.26553800 | 2.00182400  |
| C  | -1.94869300 | 1.86104500  | 3.17897700  |
| C  | -2.24720100 | 2.89346800  | 4.27990000  |
| H  | -1.32847900 | 3.19858400  | 4.81113700  |
| H  | -2.71349700 | 3.80305700  | 3.86266900  |
| H  | -2.93851600 | 2.46658900  | 5.02795500  |



|    |             |             |             |
|----|-------------|-------------|-------------|
| C  | -4.09124200 | -2.14818900 | 2.66220300  |
| H  | -3.11276000 | -2.01883100 | 2.16542300  |
| H  | -3.99102000 | -1.82864500 | 3.71486100  |
| H  | -4.33704400 | -3.22527800 | 2.65348800  |
| C  | -6.53810000 | -1.45874100 | 2.67006000  |
| H  | -6.45272800 | -1.09293600 | 3.70835200  |
| H  | -7.32383200 | -0.87090700 | 2.16424400  |
| H  | -6.87768200 | -2.50832300 | 2.71725100  |
| C  | -2.90048200 | -1.00736100 | -3.56032900 |
| H  | -2.16137100 | -1.18029700 | -2.75733600 |
| H  | -3.11107000 | -1.97770500 | -4.04481600 |
| H  | -2.44277700 | -0.34214500 | -4.31383100 |
| H  | -3.90921800 | 0.58810900  | -2.54040100 |
| C  | -1.33040700 | 0.57704200  | 3.76429200  |
| H  | -2.00677100 | 0.12744200  | 4.51305300  |
| H  | -1.14869300 | -0.16912100 | 2.96946800  |
| H  | -0.36626600 | 0.78940600  | 4.26031600  |
| H  | -2.91107400 | 1.58038500  | 2.71707000  |
| C  | 5.13913300  | -1.96574000 | 0.15515800  |
| C  | 6.24931100  | -1.09175800 | 0.20267400  |
| C  | 5.35453200  | -3.35574500 | -0.02089600 |
| C  | 7.54567800  | -1.58621200 | 0.07786000  |
| H  | 6.10526100  | -0.01285600 | 0.32396000  |
| C  | 6.64359300  | -3.85289800 | -0.14318000 |
| H  | 4.49998200  | -4.03607300 | -0.06189400 |
| C  | 7.75221300  | -2.97361200 | -0.09693800 |
| H  | 8.38688300  | -0.89131900 | 0.11115600  |
| H  | 6.82751200  | -4.92202500 | -0.28003800 |
| O  | 8.96471400  | -3.55745700 | -0.23304500 |
| C  | 10.12752900 | -2.71365900 | -0.21034000 |
| H  | 10.23035200 | -2.20268800 | 0.76329900  |
| H  | 10.98120400 | -3.38866000 | -0.36329000 |
| H  | 10.09626000 | -1.96770900 | -1.02398300 |
| O  | 2.75546700  | -2.29368800 | 0.15144300  |
| C  | 1.95999800  | -0.08509000 | 0.46927900  |
| C  | 1.52840500  | -1.51640100 | 0.22371400  |
| C  | 0.32127200  | -2.07245700 | 0.06315300  |
| H  | 0.30544300  | -3.15852900 | -0.11006300 |
| H  | 4.04443800  | 0.62892600  | 0.52112400  |
| H  | 1.60518400  | 0.31763200  | 1.43476200  |
| H  | 1.64209100  | 0.60992300  | -0.32613500 |
| O  | 4.91780500  | 2.09731700  | 0.61833600  |
| Cl | 4.61294100  | 2.91748400  | -0.65498000 |
| O  | 3.64581000  | 2.12864900  | -1.50120200 |
| O  | 4.00448500  | 4.22538200  | -0.23489600 |
| O  | 5.89545800  | 3.14427800  | -1.39525700 |

### Int2\_gendo\_CIO4

|    |             |             |             |
|----|-------------|-------------|-------------|
| N  | -3.29209600 | -0.47409800 | -0.23457700 |
| C  | -3.63915100 | -1.72369500 | -0.45699200 |
| C  | 2.80798400  | 0.44374900  | 0.45674500  |
| C  | 4.25901400  | 2.08646300  | 1.08958500  |
| C  | 4.98045900  | 1.13453300  | 0.42026100  |
| H  | 4.55595900  | 3.02247500  | 1.55555500  |
| H  | 6.03713900  | 1.06758100  | 0.17479700  |
| N  | 4.07659500  | 0.14220500  | 0.04606500  |
| N  | 2.93889400  | 1.64738800  | 1.09825300  |
| Au | 1.01973000  | -0.47295300 | 0.14129100  |
| C  | 1.81567300  | 2.32413000  | 1.70510800  |
| C  | 1.06748200  | 3.23021300  | 0.91988800  |
| C  | 1.47491400  | 1.98870200  | 3.03479800  |
| C  | -0.07449500 | 3.80155600  | 1.50994400  |
| C  | 0.32868500  | 2.59624000  | 3.57882600  |

|   |             |             |             |
|---|-------------|-------------|-------------|
| C | -0.44295600 | 3.48569800  | 2.82251600  |
| H | -0.70221400 | 4.47722900  | 0.92255500  |
| H | 0.02791600  | 2.35097100  | 4.60267200  |
| H | -1.34614100 | 3.92962500  | 3.25328500  |
| C | 4.40935400  | -1.04177100 | -0.70663200 |
| C | 4.27907800  | -1.00066300 | -2.11226000 |
| C | 4.82861600  | -2.19115500 | 0.00069600  |
| C | 4.59203700  | -2.17509800 | -2.82132000 |
| C | 5.12780300  | -3.33778600 | -0.75663500 |
| C | 5.01221700  | -3.32994800 | -2.15223900 |
| H | 4.49751000  | -2.18214800 | -3.91197300 |
| H | 5.44826900  | -4.25087100 | -0.24557400 |
| H | 5.24758100  | -4.23457300 | -2.72257400 |
| C | 2.26897500  | 0.97577200  | 3.85000200  |
| H | 3.14415000  | 0.66367500  | 3.25409400  |
| C | 2.79742600  | 1.58699500  | 5.15979500  |
| H | 3.40651800  | 0.84667600  | 5.70816000  |
| H | 3.42724700  | 2.47274300  | 4.96630300  |
| H | 1.97205400  | 1.89773700  | 5.82453000  |
| C | 1.42282800  | -0.28229500 | 4.12159800  |
| H | 0.54608400  | -0.04431800 | 4.75028700  |
| H | 1.05325900  | -0.72040000 | 3.17721800  |
| H | 2.02147400  | -1.04579900 | 4.64967900  |
| C | 4.88948000  | -2.21632900 | 1.52300300  |
| C | 6.17448000  | -2.87069200 | 2.05606100  |
| H | 7.07691500  | -2.38573500 | 1.64492700  |
| H | 6.21132700  | -2.78649100 | 3.15626600  |
| H | 6.22240300  | -3.94547600 | 1.80800500  |
| C | 3.79687500  | 0.24140500  | -2.85090700 |
| H | 3.65514900  | 1.04793800  | -2.11111200 |
| C | 1.42628400  | 3.55619700  | -0.52503800 |
| C | 1.54313300  | 5.07387600  | -0.75382700 |
| H | 0.57599900  | 5.58347200  | -0.59899400 |
| H | 2.28094300  | 5.53135600  | -0.07149800 |
| H | 1.86269700  | 5.27851300  | -1.79078500 |
| C | 2.43143100  | -0.01712300 | -3.51474400 |
| H | 1.68440800  | -0.33445800 | -2.76500900 |
| H | 2.06102200  | 0.90070400  | -4.00453800 |
| H | 2.50107400  | -0.80797600 | -4.28304000 |
| C | 4.83665200  | 0.73057100  | -3.87490400 |
| H | 4.48450700  | 1.65652800  | -4.36249700 |
| H | 5.80708900  | 0.94470300  | -3.39397300 |
| H | 5.01028800  | -0.01910800 | -4.66711800 |
| C | 3.63484100  | -2.91239200 | 2.08801500  |
| H | 2.71165500  | -2.41970500 | 1.73439300  |
| H | 3.59808300  | -3.97025700 | 1.77095200  |
| H | 3.64166700  | -2.88626100 | 3.19232600  |
| H | 4.87890900  | -1.17189600 | 1.88087800  |
| C | 0.40505300  | 2.92477300  | -1.49176300 |
| H | 0.66501600  | 3.16431000  | -2.53851300 |
| H | 0.39334400  | 1.82534900  | -1.38073500 |
| H | -0.61689800 | 3.29516800  | -1.29858200 |
| H | 2.41295400  | 3.11096900  | -0.74459400 |
| C | -5.02763600 | -2.15725000 | -0.57093900 |
| C | -6.07211300 | -1.22178200 | -0.74585600 |
| C | -5.34334200 | -3.53779000 | -0.51281400 |
| C | -7.39717600 | -1.64273200 | -0.84538600 |
| H | -5.86088500 | -0.15015700 | -0.81875500 |
| C | -6.66077000 | -3.96339600 | -0.61346700 |
| H | -4.54349100 | -4.27025900 | -0.37914700 |
| C | -7.70253900 | -3.01991800 | -0.77648200 |
| H | -8.18319500 | -0.89807400 | -0.98398800 |
| H | -6.91698000 | -5.02537700 | -0.56399600 |

|    |              |             |             |
|----|--------------|-------------|-------------|
| O  | -8.95249400  | -3.53413200 | -0.86015100 |
| C  | -10.04641900 | -2.61574000 | -1.01060300 |
| H  | -9.95908500  | -2.04049900 | -1.94952300 |
| H  | -10.95078100 | -3.23965900 | -1.04550900 |
| H  | -10.10810500 | -1.92375800 | -0.15180300 |
| O  | -2.72268500  | -2.68024900 | -0.58501600 |
| C  | -1.90381600  | 0.02609700  | -0.25025400 |
| C  | -0.89474900  | -1.09609800 | -0.17514100 |
| C  | -1.34254200  | -2.34768200 | -0.34543400 |
| H  | -0.77495800  | -3.27821300 | -0.34407500 |
| H  | -4.02355100  | 0.25257900  | -0.06540300 |
| H  | -1.77078400  | 0.63202500  | -1.16572600 |
| H  | -1.80501300  | 0.72646500  | 0.59633900  |
| O  | -5.20575000  | 3.98228600  | -0.78911700 |
| O  | -3.67223700  | 2.33450500  | -1.81261900 |
| Cl | -4.21467700  | 2.89134300  | -0.52164700 |
| O  | -3.08865200  | 3.39267700  | 0.34286000  |
| O  | -4.93317300  | 1.75230900  | 0.22837900  |

### TS2\_5exo\_CIO4

|    |             |             |             |
|----|-------------|-------------|-------------|
| N  | -3.55525500 | 1.14156300  | -3.57108500 |
| C  | -3.51640200 | 0.71915900  | -2.35273100 |
| C  | 1.78535000  | -0.75785300 | 0.66040800  |
| C  | 3.36325500  | -1.55852000 | 2.10235300  |
| C  | 2.15966900  | -2.08906000 | 2.47597600  |
| H  | 4.36460200  | -1.68517300 | 2.50476700  |
| H  | 1.88919700  | -2.77367500 | 3.27493800  |
| N  | 1.21031900  | -1.58712700 | 1.58819000  |
| N  | 3.11353000  | -0.74957500 | 0.99640200  |
| Au | 0.89317900  | 0.25256700  | -0.84393100 |
| C  | 4.13207100  | -0.07446200 | 0.22799100  |
| C  | 4.78105900  | -0.80613800 | -0.79166100 |
| C  | 4.42692900  | 1.27737600  | 0.52107300  |
| C  | 5.77968000  | -0.14111700 | -1.52680500 |
| C  | 5.43561900  | 1.89148900  | -0.24245400 |
| C  | 6.10701000  | 1.19057300  | -1.25210600 |
| H  | 6.29843100  | -0.67320800 | -2.33071800 |
| H  | 5.69254000  | 2.93728300  | -0.05171400 |
| H  | 6.88607200  | 1.69218500  | -1.83569700 |
| C  | -0.17975700 | -1.97464200 | 1.59356800  |
| C  | -0.58766900 | -3.00881000 | 0.72055900  |
| C  | -1.06166900 | -1.32820400 | 2.48917900  |
| C  | -1.93547500 | -3.40747300 | 0.77778400  |
| C  | -2.39396500 | -1.77917700 | 2.51739600  |
| C  | -2.82734200 | -2.80903200 | 1.67339500  |
| H  | -2.28552100 | -4.20031700 | 0.10906000  |
| H  | -3.10298300 | -1.30876800 | 3.20567500  |
| H  | -3.87101700 | -3.13767200 | 1.70491200  |
| C  | 3.70228900  | 2.02865600  | 1.63112800  |
| H  | 2.70189700  | 1.57507400  | 1.73916800  |
| C  | 4.44578600  | 1.85896200  | 2.97184200  |
| H  | 3.90531300  | 2.38485100  | 3.77883500  |
| H  | 4.53683000  | 0.79746200  | 3.25996900  |
| H  | 5.46467400  | 2.28232600  | 2.91027200  |
| C  | 3.49251000  | 3.51755200  | 1.31470900  |
| H  | 4.44389100  | 4.07871200  | 1.32221500  |
| H  | 3.01052800  | 3.66042900  | 0.33318400  |
| H  | 2.83727100  | 3.96973500  | 2.07769000  |
| C  | -0.60256400 | -0.20217900 | 3.40652000  |
| C  | -0.36756600 | -0.72895600 | 4.83588200  |
| H  | 0.38531900  | -1.53616200 | 4.85361400  |
| H  | -0.01035000 | 0.08395700  | 5.49274900  |
| H  | -1.30302900 | -1.12905400 | 5.26702600  |

|    |             |             |             |
|----|-------------|-------------|-------------|
| C  | 0.36261300  | -3.68464100 | -0.25981100 |
| H  | 1.36592100  | -3.24217600 | -0.13512900 |
| C  | 4.39425500  | -2.23957800 | -1.13500700 |
| C  | 5.61250300  | -3.17816900 | -1.16125800 |
| H  | 6.31999300  | -2.90671700 | -1.96424700 |
| H  | 6.16053200  | -3.15396000 | -0.20318400 |
| H  | 5.28749600  | -4.21763200 | -1.34389000 |
| C  | -0.07678700 | -3.42093200 | -1.71161700 |
| H  | -0.12142300 | -2.33609200 | -1.91465200 |
| H  | 0.63792800  | -3.87686300 | -2.41955500 |
| H  | -1.07490100 | -3.84889500 | -1.91324300 |
| C  | 0.48407600  | -5.19249900 | 0.02582100  |
| H  | 1.20779300  | -5.65531200 | -0.66832100 |
| H  | 0.83093800  | -5.38021900 | 1.05702500  |
| H  | -0.48343500 | -5.70928800 | -0.10404000 |
| C  | -1.58613100 | 0.98033200  | 3.41118200  |
| H  | -1.79470400 | 1.33686300  | 2.38963500  |
| H  | -2.54564000 | 0.71289900  | 3.88871300  |
| H  | -1.15780700 | 1.82283500  | 3.98112400  |
| H  | 0.36269500  | 0.17298700  | 3.02466900  |
| C  | 3.62793800  | -2.27973100 | -2.47164700 |
| H  | 3.31087600  | -3.31213400 | -2.70447200 |
| H  | 2.72813100  | -1.64021000 | -2.43320600 |
| H  | 4.26282100  | -1.92375700 | -3.30277900 |
| H  | 3.71051900  | -2.61133400 | -0.35211000 |
| C  | -4.62448400 | 0.30117100  | -1.50138900 |
| C  | -5.93520800 | 0.28388700  | -2.01963600 |
| C  | -4.41102400 | -0.08199800 | -0.15735500 |
| C  | -7.01611400 | -0.10850100 | -1.22751900 |
| H  | -6.09936000 | 0.58272800  | -3.05913600 |
| C  | -5.48361800 | -0.46950200 | 0.64023100  |
| H  | -3.40111100 | -0.07418400 | 0.25945500  |
| C  | -6.79361300 | -0.48971900 | 0.11374800  |
| H  | -8.02182100 | -0.11451300 | -1.65325900 |
| H  | -5.33151200 | -0.76292500 | 1.68285500  |
| O  | -7.76835400 | -0.89167700 | 0.97442600  |
| C  | -9.10962700 | -0.95734000 | 0.47614000  |
| H  | -9.19109800 | -1.66572400 | -0.36851300 |
| H  | -9.71978300 | -1.31861200 | 1.31663200  |
| H  | -9.47351700 | 0.03775000  | 0.16106900  |
| O  | -2.24765900 | 0.64953900  | -1.76219900 |
| C  | -2.16617900 | 1.43078700  | -3.93553400 |
| C  | -1.34774200 | 1.11538000  | -2.69856700 |
| C  | -0.02495300 | 1.27094000  | -2.39221000 |
| H  | 0.56506100  | 1.62558100  | -3.25344400 |
| H  | -0.02614100 | 2.47605600  | -1.50508800 |
| H  | -1.85260900 | 0.81886900  | -4.80300500 |
| H  | -2.05100200 | 2.48900500  | -4.23718400 |
| O  | 0.05350800  | 3.57982800  | -1.08783500 |
| O  | -0.87284800 | 5.15524400  | 0.54963300  |
| O  | 0.19440300  | 3.08340000  | 1.38144100  |
| O  | -1.98800100 | 2.95960400  | 0.22607900  |
| Cl | -0.69773300 | 3.69273600  | 0.35524300  |

### TS2\_6endo\_CIO4

|   |             |             |             |
|---|-------------|-------------|-------------|
| N | 2.80060700  | -2.23170300 | 0.56795400  |
| C | 3.33486400  | -1.92193900 | -0.56865600 |
| C | -1.27309600 | 1.29627600  | 0.57991800  |
| C | -1.12850100 | 3.47362900  | 1.24373900  |
| C | -2.44310100 | 3.10365500  | 1.32652800  |
| H | -0.62717700 | 4.41309600  | 1.46166900  |
| H | -3.32954500 | 3.65283000  | 1.63296600  |
| N | -2.51172200 | 1.77279900  | 0.91798700  |

|    |             |             |             |
|----|-------------|-------------|-------------|
| N  | -0.43291600 | 2.35872200  | 0.79026600  |
| Au | -0.58960500 | -0.49476200 | -0.06187000 |
| C  | 0.97852600  | 2.29053100  | 0.48845900  |
| C  | 1.87361900  | 1.87773200  | 1.50098800  |
| C  | 1.38533500  | 2.55868200  | -0.83816400 |
| C  | 3.22569400  | 1.72627700  | 1.14220000  |
| C  | 2.74931200  | 2.39685900  | -1.14037600 |
| C  | 3.65983100  | 1.97863200  | -0.16404100 |
| H  | 3.94538000  | 1.38359300  | 1.89210800  |
| H  | 3.09717000  | 2.58555000  | -2.16132900 |
| H  | 4.71338400  | 1.83704200  | -0.42525100 |
| C  | -3.72597800 | 0.99919400  | 0.82965000  |
| C  | -4.12892800 | 0.25282800  | 1.95879200  |
| C  | -4.43409700 | 1.00786400  | -0.39144100 |
| C  | -5.29598700 | -0.52048800 | 1.83110100  |
| C  | -5.59812300 | 0.22247500  | -0.46187900 |
| C  | -6.02299500 | -0.53583500 | 0.63469200  |
| H  | -5.63289600 | -1.12624800 | 2.67787000  |
| H  | -6.16886700 | 0.19435100  | -1.39555300 |
| H  | -6.92546300 | -1.15059300 | 0.55451800  |
| C  | 0.40374000  | 2.97415500  | -1.92707700 |
| H  | -0.59646100 | 3.07866000  | -1.47176300 |
| C  | 0.77941000  | 4.33916000  | -2.53143700 |
| H  | 0.03003800  | 4.64358600  | -3.28336700 |
| H  | 0.82490900  | 5.12368000  | -1.75598300 |
| H  | 1.76217500  | 4.30267900  | -3.03369200 |
| C  | 0.30003700  | 1.88931500  | -3.01541000 |
| H  | -0.02574600 | 0.92784800  | -2.57989600 |
| H  | -0.43185200 | 2.18636600  | -3.78724800 |
| H  | 1.27267800  | 1.72695700  | -3.51341700 |
| C  | -3.96001200 | 1.80145100  | -1.60347000 |
| C  | -5.03344600 | 2.79238800  | -2.08800200 |
| H  | -5.33324600 | 3.48838400  | -1.28502200 |
| H  | -4.64823800 | 3.39013700  | -2.93297800 |
| H  | -5.94019000 | 2.26797700  | -2.43743800 |
| C  | -3.32031400 | 0.24122500  | 3.25092100  |
| H  | -2.58427600 | 1.06263800  | 3.19907100  |
| C  | 1.41021200  | 1.55533200  | 2.91586000  |
| C  | 2.23964800  | 2.29932200  | 3.97756800  |
| H  | 2.23528900  | 3.38986000  | 3.80547800  |
| H  | 1.82537500  | 2.10952800  | 4.98337800  |
| H  | 3.29067800  | 1.96134000  | 3.98411700  |
| C  | -2.53254400 | -1.07646400 | 3.38589100  |
| H  | -1.86922500 | -1.23159400 | 2.51771100  |
| H  | -1.91439600 | -1.06295400 | 4.30175200  |
| H  | -3.21549400 | -1.94193600 | 3.44558900  |
| C  | -4.19912300 | 0.49303000  | 4.48824800  |
| H  | -3.56997300 | 0.55911900  | 5.39340500  |
| H  | -4.76622000 | 1.43583700  | 4.39585400  |
| H  | -4.92362900 | -0.32436000 | 4.64994700  |
| C  | -3.51909000 | 0.85957100  | -2.73952400 |
| H  | -2.71213900 | 0.18616900  | -2.40588400 |
| H  | -4.35868400 | 0.23270500  | -3.08776600 |
| H  | -3.15187600 | 1.44592300  | -3.60099400 |
| H  | -3.07575100 | 2.39168100  | -1.30557300 |
| C  | 1.43451900  | 0.03336500  | 3.15773300  |
| H  | 1.09427100  | -0.20019000 | 4.18241300  |
| H  | 0.77354400  | -0.48805400 | 2.44346200  |
| H  | 2.45220800  | -0.37518000 | 3.02868200  |
| H  | 0.36403600  | 1.89262700  | 3.01956500  |
| C  | 4.67939400  | -1.33827800 | -0.71761200 |
| C  | 5.51629800  | -1.22960300 | 0.41139600  |
| C  | 5.13998800  | -0.82765300 | -1.95236900 |

|    |             |             |             |
|----|-------------|-------------|-------------|
| C  | 6.77263300  | -0.62409000 | 0.32764400  |
| H  | 5.16008300  | -1.62241900 | 1.36794300  |
| C  | 6.39246100  | -0.22429200 | -2.04921200 |
| H  | 4.50206200  | -0.89630100 | -2.83659300 |
| C  | 7.21972900  | -0.11483400 | -0.91064300 |
| H  | 7.39743100  | -0.55730000 | 1.22115000  |
| H  | 6.75537200  | 0.17387100  | -3.00144400 |
| O  | 8.42319800  | 0.49187400  | -1.10959000 |
| C  | 9.29530900  | 0.61905200  | 0.01871700  |
| H  | 9.57775600  | -0.36962700 | 0.42443800  |
| H  | 10.19366800 | 1.12975600  | -0.35738800 |
| H  | 8.83539800  | 1.22827400  | 0.81856300  |
| O  | 2.66587500  | -2.04222900 | -1.80899900 |
| C  | 1.44939600  | -2.80885900 | 0.51102200  |
| C  | 0.59356900  | -2.14700200 | -0.57016400 |
| C  | 1.29811500  | -1.87947500 | -1.71245100 |
| H  | 0.89228100  | -1.48535600 | -2.65038100 |
| H  | -0.61911600 | -2.98621000 | -0.88840200 |
| H  | 1.53961300  | -3.89535000 | 0.29818000  |
| H  | 0.99075400  | -2.72219500 | 1.50882300  |
| O  | -1.25956000 | -3.88189700 | -1.16420600 |
| O  | -3.28722200 | -2.44978600 | -1.52166200 |
| O  | -2.86573200 | -3.43141300 | 0.71108100  |
| O  | -3.49907200 | -4.89502400 | -1.18637200 |
| Cl | -2.82654800 | -3.64044800 | -0.76072200 |

### TsOH

|   |             |             |             |
|---|-------------|-------------|-------------|
| H | -2.03385400 | 2.26011200  | 0.30432200  |
| O | -1.46202600 | 2.26385200  | -0.50229400 |
| S | 0.08016900  | 1.88107300  | -0.01859800 |
| O | 0.26250600  | 2.36894600  | 1.36424600  |
| O | 0.92406100  | 2.35704100  | -1.12636600 |
| C | 0.06755200  | 0.09759600  | -0.01060400 |
| C | -0.01186500 | -0.58556700 | 1.21075100  |
| C | 0.11963900  | -0.58996400 | -1.23384500 |
| C | -0.04119000 | -1.98510400 | 1.19901400  |
| H | -0.04256000 | -0.02956800 | 2.15166000  |
| C | 0.08370800  | -1.98659000 | -1.22164700 |
| H | 0.19271500  | -0.04014600 | -2.17621700 |
| C | 0.00440900  | -2.70633600 | -0.01025200 |
| H | -0.10163500 | -2.52870100 | 2.14779600  |
| H | 0.12268600  | -2.53269800 | -2.17023100 |
| C | -0.00242500 | -4.21318500 | -0.01412200 |
| H | -0.56283300 | -4.61149200 | -0.87671100 |
| H | 1.02798400  | -4.60867900 | -0.08715300 |
| H | -0.44628600 | -4.61894600 | 0.90972300  |

### IPrAuOTs

|    |             |             |             |
|----|-------------|-------------|-------------|
| C  | 1.78788200  | -0.03144900 | 0.13923700  |
| C  | 3.90734000  | 0.60900100  | 0.64132900  |
| C  | 3.88647600  | -0.75068800 | 0.62647500  |
| H  | 4.70882100  | 1.31712500  | 0.83363400  |
| H  | 4.66478100  | -1.48768400 | 0.80462400  |
| N  | 2.58437300  | -1.12440400 | 0.31859300  |
| N  | 2.61804400  | 1.03179400  | 0.33755100  |
| Au | -0.13955700 | -0.02673900 | -0.22999500 |
| C  | 2.19790300  | 2.41066900  | 0.27583300  |
| C  | 2.40633900  | 3.13441100  | -0.92663600 |
| C  | 1.60432300  | 2.96659400  | 1.42404600  |
| C  | 1.99593200  | 4.47975300  | -0.94032300 |
| C  | 1.21462800  | 4.31585200  | 1.35464200  |
| C  | 1.40974600  | 5.06439700  | 0.18755500  |

|   |             |             |             |
|---|-------------|-------------|-------------|
| H | 2.13268700  | 5.07505100  | -1.84800500 |
| H | 0.75008700  | 4.78331100  | 2.22818500  |
| H | 1.09726800  | 6.11333900  | 0.15497700  |
| C | 2.10802000  | -2.48355900 | 0.23686100  |
| C | 2.14318100  | -3.13759100 | -1.01608400 |
| C | 1.60575300  | -3.08275500 | 1.41248400  |
| C | 1.66256900  | -4.45864500 | -1.06318000 |
| C | 1.13866000  | -4.40538900 | 1.30798500  |
| C | 1.16810800  | -5.08665600 | 0.08566700  |
| H | 1.66714000  | -4.99717100 | -2.01596900 |
| H | 0.73771300  | -4.90213800 | 2.19732700  |
| H | 0.79531100  | -6.11443800 | 0.02621900  |
| C | 1.41100600  | 2.16480500  | 2.70385100  |
| H | 1.62054700  | 1.10410200  | 2.47960600  |
| C | 2.41501700  | 2.61879600  | 3.78069800  |
| H | 2.30085200  | 2.00914800  | 4.69443600  |
| H | 3.45763300  | 2.52022500  | 3.43030000  |
| H | 2.24986900  | 3.67595100  | 4.05593100  |
| C | -0.03600300 | 2.24048500  | 3.22076800  |
| H | -0.30266600 | 3.26334400  | 3.54105200  |
| H | -0.76162100 | 1.92641800  | 2.45086600  |
| H | -0.15707600 | 1.57690200  | 4.09527000  |
| C | 1.55462300  | -2.34922000 | 2.74634600  |
| C | 2.46941500  | -3.02660700 | 3.78395200  |
| H | 3.51275300  | -3.08376700 | 3.42696900  |
| H | 2.46195500  | -2.45751900 | 4.73042000  |
| H | 2.13214700  | -4.05457200 | 4.00670700  |
| C | 2.62342000  | -2.44394900 | -2.28420800 |
| H | 3.05366400  | -1.46808900 | -2.00082200 |
| C | 2.98110400  | 2.47357400  | -2.17530000 |
| C | 3.92376300  | 3.39413300  | -2.96654800 |
| H | 3.38938600  | 4.25724300  | -3.40067100 |
| H | 4.74108000  | 3.78211900  | -2.33398800 |
| H | 4.37560800  | 2.83611400  | -3.80495000 |
| C | 1.43314300  | -2.16794500 | -3.22346700 |
| H | 0.65086100  | -1.58032300 | -2.71049600 |
| H | 1.76501800  | -1.60246800 | -4.11210100 |
| H | 0.97426800  | -3.11074200 | -3.57101300 |
| C | 3.72634500  | -3.24257500 | -3.00087600 |
| H | 4.08969200  | -2.68199500 | -3.88008300 |
| H | 4.58649300  | -3.43161900 | -2.33516000 |
| H | 3.35529700  | -4.21847800 | -3.36067300 |
| C | 0.11010500  | -2.23312400 | 3.26599700  |
| H | -0.55189600 | -1.74251600 | 2.53194800  |
| H | -0.31538900 | -3.22646400 | 3.49454200  |
| H | 0.08774500  | -1.63770100 | 4.19611800  |
| H | 1.93401300  | -1.32412600 | 2.59151200  |
| C | 1.83604400  | 1.95897300  | -3.07217100 |
| H | 2.24161200  | 1.42032800  | -3.94728300 |
| H | 1.16847200  | 1.27432500  | -2.51983300 |
| H | 1.22298100  | 2.80083800  | -3.44089000 |
| H | 3.57288300  | 1.59820500  | -1.85603300 |
| O | -2.17140600 | -0.08426600 | -0.64726500 |
| S | -3.08675800 | 0.28043900  | 0.58743000  |
| O | -2.94098200 | 1.72768800  | 0.96454500  |
| O | -2.94500500 | -0.73018400 | 1.69019800  |
| C | -4.71316500 | 0.06472100  | -0.14483100 |
| C | -5.33596800 | 1.14655800  | -0.78363400 |
| C | -5.34350800 | -1.18612300 | -0.06876100 |
| C | -6.60104000 | 0.96480900  | -1.35719700 |
| H | -4.83983300 | 2.12077200  | -0.81318300 |
| C | -6.60744100 | -1.35036500 | -0.64842400 |
| H | -4.85162400 | -2.01203900 | 0.45271000  |

|   |             |             |             |
|---|-------------|-------------|-------------|
| C | -7.25428000 | -0.28277800 | -1.30406400 |
| H | -7.09503900 | 1.80939700  | -1.85034200 |
| H | -7.10662300 | -2.32377600 | -0.58504000 |
| C | -8.60416700 | -0.47877200 | -1.94832800 |
| H | -9.22220600 | -1.19713400 | -1.38334000 |
| H | -9.15894500 | 0.47127100  | -2.02520600 |
| H | -8.49801600 | -0.87942400 | -2.97427200 |

### Int1\_TsO

|    |             |             |             |
|----|-------------|-------------|-------------|
| N  | 2.08042200  | 0.89139600  | -2.43356400 |
| C  | 3.26641000  | 0.20494300  | -2.40263900 |
| C  | -0.95661700 | -1.58153600 | 0.83269600  |
| C  | -0.54721300 | -3.34422100 | 2.20662800  |
| C  | -1.67352800 | -2.71856200 | 2.66535500  |
| H  | -0.00732700 | -4.21575300 | 2.56704200  |
| H  | -2.32598100 | -2.93098200 | 3.50774600  |
| N  | -1.90498800 | -1.64088800 | 1.81404000  |
| N  | -0.12503900 | -2.63425700 | 1.08680900  |
| Au | -0.90337000 | -0.36870700 | -0.78528000 |
| C  | 1.07597400  | -2.91130400 | 0.33403700  |
| C  | 0.97005500  | -3.64826000 | -0.86702600 |
| C  | 2.29897300  | -2.41139800 | 0.83624500  |
| C  | 2.15930900  | -3.88604800 | -1.57862200 |
| C  | 3.45686000  | -2.68764500 | 0.08781800  |
| C  | 3.38820700  | -3.41009300 | -1.10825000 |
| H  | 2.11790400  | -4.44718400 | -2.51747200 |
| H  | 4.42036700  | -2.30676900 | 0.43879600  |
| H  | 4.29955900  | -3.59755200 | -1.68406200 |
| C  | -2.96530700 | -0.67681700 | 1.98543400  |
| C  | -4.15341900 | -0.83646500 | 1.23843900  |
| C  | -2.76385300 | 0.36806500  | 2.91715600  |
| C  | -5.16799700 | 0.11867800  | 1.43466900  |
| C  | -3.81511700 | 1.28943700  | 3.07870700  |
| C  | -5.00207200 | 1.16865500  | 2.34539700  |
| H  | -6.10243600 | 0.02924200  | 0.87093800  |
| H  | -3.70142500 | 2.11197300  | 3.79130300  |
| H  | -5.80515800 | 1.89930300  | 2.48780100  |
| C  | 2.39615900  | -1.61103200 | 2.12973500  |
| H  | 1.38023200  | -1.49519300 | 2.54551900  |
| C  | 3.24177800  | -2.36324400 | 3.17486100  |
| H  | 3.27362800  | -1.79472600 | 4.12112700  |
| H  | 2.82981400  | -3.36522800 | 3.39003500  |
| H  | 4.28198800  | -2.49454500 | 2.82721100  |
| C  | 2.95179200  | -0.19725100 | 1.87970400  |
| H  | 3.96861300  | -0.23337200 | 1.45263900  |
| H  | 2.30776300  | 0.38087000  | 1.19693200  |
| H  | 3.00782100  | 0.35625700  | 2.83444600  |
| C  | -1.49786700 | 0.47991400  | 3.75980200  |
| C  | -1.79577000 | 0.04384200  | 5.20859000  |
| H  | -2.20406100 | -0.98127800 | 5.25135000  |
| H  | -0.87244000 | 0.06988400  | 5.81366800  |
| H  | -2.53124600 | 0.71942700  | 5.68093800  |
| C  | -4.36871000 | -1.99862100 | 0.27663900  |
| H  | -3.46855200 | -2.63739900 | 0.30063000  |
| C  | -0.35725400 | -4.19128100 | -1.38202700 |
| C  | -0.37334100 | -5.73100500 | -1.34816100 |
| H  | 0.40047100  | -6.15499500 | -2.01234700 |
| H  | -0.18878700 | -6.11284100 | -0.32881200 |
| H  | -1.35358700 | -6.11293200 | -1.68452800 |

|   |             |             |             |
|---|-------------|-------------|-------------|
| C | -4.54648400 | -1.50631800 | -1.17100400 |
| H | -3.65661100 | -0.94478000 | -1.50815100 |
| H | -4.68793700 | -2.36370800 | -1.85277400 |
| H | -5.42692900 | -0.84650200 | -1.26886600 |
| C | -5.56232600 | -2.86415000 | 0.72180800  |
| H | -5.67766300 | -3.73173000 | 0.04859900  |
| H | -5.42380400 | -3.24317000 | 1.74935500  |
| H | -6.50655000 | -2.29166500 | 0.69771500  |
| C | -0.87406400 | 1.88481900  | 3.71931800  |
| H | -0.55848500 | 2.15481500  | 2.69762500  |
| H | -1.56592500 | 2.65752100  | 4.09852500  |
| H | 0.02628200  | 1.90684100  | 4.35942000  |
| H | -0.74722000 | -0.21723300 | 3.34890000  |
| C | -0.67229800 | -3.66222300 | -2.79259300 |
| H | -1.66439600 | -4.01694800 | -3.12466700 |
| H | -0.68084400 | -2.55783800 | -2.80558900 |
| H | 0.07334100  | -4.00564400 | -3.53118700 |
| H | -1.15887100 | -3.83771900 | -0.71026700 |
| C | 4.31738300  | 0.70796700  | -1.46362800 |
| C | 4.22115600  | 1.90295800  | -0.72503500 |
| C | 5.46613600  | -0.09602300 | -1.29770500 |
| C | 5.23054100  | 2.28138600  | 0.16937500  |
| H | 3.35452100  | 2.56440400  | -0.83011500 |
| C | 6.47492500  | 0.26425400  | -0.40887600 |
| H | 5.53923700  | -1.01640500 | -1.88368200 |
| C | 6.36075700  | 1.45711400  | 0.33971500  |
| H | 5.12250200  | 3.21244800  | 0.73068300  |
| H | 7.36448900  | -0.35848400 | -0.27210700 |
| O | 7.39345300  | 1.71995100  | 1.19054400  |
| C | 7.30576800  | 2.90385000  | 1.99017200  |
| H | 6.42134500  | 2.87987100  | 2.65337400  |
| H | 8.22017300  | 2.91724300  | 2.60164600  |
| H | 7.27190200  | 3.81535600  | 1.36535900  |
| O | 3.45456300  | -0.80596900 | -3.11223800 |
| C | 1.03114400  | 0.44141400  | -3.32286100 |
| C | -0.30722400 | 0.59533200  | -2.73568800 |
| C | -1.48623800 | 0.88729200  | -2.44686200 |
| H | -2.46512000 | 1.35085100  | -2.44662000 |
| H | 1.90490900  | 1.77429800  | -1.91616500 |
| H | 1.01870400  | 1.00897300  | -4.27810100 |
| H | 1.24402700  | -0.61295800 | -3.57721900 |
| O | 1.33021800  | 3.40113900  | -1.38131600 |
| S | 0.47283000  | 3.42729700  | -0.12512100 |
| O | 0.69338800  | 4.64571400  | 0.71391900  |
| O | 0.52476700  | 2.12767600  | 0.63341100  |
| C | -1.21997400 | 3.54455400  | -0.75456500 |
| C | -2.28543000 | 3.01154500  | -0.01267800 |
| C | -1.46666200 | 4.16654200  | -1.98733500 |
| C | -3.58932200 | 3.08114200  | -0.52027100 |
| H | -2.09292800 | 2.51659400  | 0.94321300  |
| C | -2.77488800 | 4.23287200  | -2.48474300 |
| H | -0.62718700 | 4.56089900  | -2.56703000 |
| C | -3.85812600 | 3.68810400  | -1.76456900 |
| H | -4.41122300 | 2.64369600  | 0.05681700  |
| H | -2.95943500 | 4.70616000  | -3.45620000 |
| C | -5.26784500 | 3.77120500  | -2.29768400 |
| H | -5.28339400 | 3.81045300  | -3.40011900 |
| H | -5.87490700 | 2.90811600  | -1.97413200 |
| H | -5.77872600 | 4.68214300  | -1.93255300 |

### TS1\_5exo\_TsO

|   |             |             |             |
|---|-------------|-------------|-------------|
| N | -2.26106100 | -0.34177400 | -0.74716700 |
| C | -2.84730900 | -1.45710500 | -1.26028700 |

|    |             |             |             |
|----|-------------|-------------|-------------|
| C  | 3.35532900  | 0.39360200  | 0.42124900  |
| C  | 4.19867700  | 2.04872000  | 1.72914600  |
| C  | 5.04682200  | 0.97731500  | 1.81918700  |
| H  | 4.22506000  | 3.03314100  | 2.18882300  |
| H  | 5.97003800  | 0.82955900  | 2.37319400  |
| N  | 4.51197400  | -0.02390000 | 1.01181400  |
| N  | 3.17318700  | 1.67081800  | 0.86931500  |
| Au | 2.07853200  | -0.60405200 | -0.77519800 |
| C  | 2.02915700  | 2.46805100  | 0.49273800  |
| C  | 2.11413100  | 3.24748600  | -0.68263000 |
| C  | 0.85824100  | 2.37140200  | 1.27834700  |
| C  | 0.95677900  | 3.94580700  | -1.07359800 |
| C  | -0.27162700 | 3.08391800  | 0.83619300  |
| C  | -0.22574800 | 3.85794900  | -0.32988300 |
| H  | 0.98028200  | 4.54915000  | -1.98690200 |
| H  | -1.21061000 | 3.00280000  | 1.39058700  |
| H  | -1.13457900 | 4.36258400  | -0.66935600 |
| C  | 5.07468800  | -1.33994300 | 0.83092900  |
| C  | 6.01830300  | -1.52804100 | -0.20351500 |
| C  | 4.63888500  | -2.37756400 | 1.68563700  |
| C  | 6.54811100  | -2.82151900 | -0.36046900 |
| C  | 5.20112000  | -3.65138600 | 1.48364000  |
| C  | 6.14724800  | -3.87049900 | 0.47551300  |
| H  | 7.27851700  | -3.00855500 | -1.15401300 |
| H  | 4.88659300  | -4.48221400 | 2.12331900  |
| H  | 6.57174900  | -4.87002700 | 0.33595600  |
| C  | 0.77752900  | 1.51200700  | 2.53432000  |
| H  | 1.77868600  | 1.09047500  | 2.73514200  |
| C  | 0.37587400  | 2.35498800  | 3.75826800  |
| H  | 0.37483900  | 1.73034900  | 4.66898000  |
| H  | 1.07621400  | 3.19358100  | 3.91755100  |
| H  | -0.63735100 | 2.77609200  | 3.63934900  |
| C  | -0.19660100 | 0.33546100  | 2.32994100  |
| H  | -1.21893000 | 0.69621600  | 2.12230300  |
| H  | 0.12055000  | -0.30161100 | 1.48451900  |
| H  | -0.23166500 | -0.29522000 | 3.23649300  |
| C  | 3.58583800  | -2.15796200 | 2.76442600  |
| C  | 4.11331700  | -2.53555100 | 4.16009500  |
| H  | 5.02436100  | -1.96648800 | 4.41473200  |
| H  | 3.34911700  | -2.31919900 | 4.92699700  |
| H  | 4.35625600  | -3.61082800 | 4.22420900  |
| C  | 6.41360100  | -0.40490600 | -1.15423300 |
| H  | 5.98686400  | 0.53796400  | -0.77049200 |
| C  | 3.37705500  | 3.30754900  | -1.53331000 |
| C  | 3.86235900  | 4.75500600  | -1.72863100 |
| H  | 3.12477300  | 5.35730300  | -2.28738700 |
| H  | 4.04101600  | 5.25383900  | -0.76025800 |
| H  | 4.80653100  | 4.76851400  | -2.30129700 |
| C  | 5.80823800  | -0.65202200 | -2.54975700 |
| H  | 4.70922200  | -0.75107500 | -2.49615200 |
| H  | 6.04621800  | 0.18703800  | -3.22725600 |
| H  | 6.21052600  | -1.57776700 | -2.99838500 |
| C  | 7.93853200  | -0.21897000 | -1.23475500 |
| H  | 8.18126300  | 0.63645400  | -1.88921900 |
| H  | 8.37461500  | -0.02330100 | -0.23979400 |
| H  | 8.43755500  | -1.10978300 | -1.65473000 |
| C  | 2.29499800  | -2.92790200 | 2.42708000  |
| H  | 1.90194200  | -2.62814400 | 1.43901600  |
| H  | 2.47267800  | -4.01779300 | 2.40699000  |
| H  | 1.51611300  | -2.72400200 | 3.18259800  |
| H  | 3.33203700  | -1.08393500 | 2.78582200  |
| C  | 3.15186500  | 2.60785700  | -2.88766100 |
| H  | 4.08367000  | 2.59949900  | -3.48078100 |

|   |              |             |             |   |             |             |             |
|---|--------------|-------------|-------------|---|-------------|-------------|-------------|
| H | 2.82490900   | 1.56190400  | -2.74477400 | H | 0.50317600  | 4.91853900  | 1.73052200  |
| H | 2.37649600   | 3.12651000  | -3.47924200 | H | 1.17163100  | 5.91926600  | -0.44164200 |
| H | 4.17701400   | 2.75878500  | -1.00609500 | C | 3.24482400  | -2.31766700 | 0.99470500  |
| C | -4.13257200  | -1.91763700 | -0.67604800 | C | 4.01456500  | -2.96798600 | 0.00473500  |
| C | -4.63994100  | -1.43030400 | 0.54433100  | C | 2.25141500  | -2.96994500 | 1.75899100  |
| C | -4.89617100  | -2.85495300 | -1.40542900 | C | 3.75451200  | -4.33226800 | -0.21814500 |
| C | -5.88520000  | -1.84942300 | 1.02176800  | C | 2.03251700  | -4.33445700 | 1.49510500  |
| H | -4.08034200  | -0.69545600 | 1.13018100  | C | 2.77295200  | -5.00833200 | 0.51654800  |
| C | -6.14552300  | -3.26513500 | -0.95006700 | H | 4.32344700  | -4.86730300 | -0.98521900 |
| H | -4.49469000  | -3.23873000 | -2.34783900 | H | 1.26553900  | -4.87137700 | 2.06246800  |
| C | -6.65545600  | -2.75291400 | 0.26350500  | H | 2.58224900  | -6.06906100 | 0.32336300  |
| H | -6.25679400  | -1.44463400 | 1.96500800  | C | 1.30023300  | 2.54975300  | 2.83625600  |
| H | -6.75453100  | -3.97362700 | -1.51947000 | H | 1.87709000  | 1.62323200  | 3.00326300  |
| O | -7.90370500  | -3.18267000 | 0.60888000  | C | 1.58256900  | 3.48647900  | 4.02495200  |
| C | -8.46195800  | -2.67360700 | 1.82631800  | H | 1.29040400  | 2.99986800  | 4.97227600  |
| H | -8.53237900  | -1.57118900 | 1.80998000  | H | 2.65318200  | 3.74970700  | 4.09056100  |
| H | -9.47181900  | -3.10434600 | 1.89201100  | H | 1.00851900  | 4.42617200  | 3.94261800  |
| H | -7.86928800  | -2.99193600 | 2.70361900  | C | -0.18790400 | 2.15693100  | 2.77437300  |
| O | -2.28944300  | -2.05458800 | -2.21914700 | H | -0.83141500 | 3.03619000  | 2.59951400  |
| C | -1.12034200  | 0.15464900  | -1.49202400 | H | -0.37935200 | 1.45142700  | 1.95119100  |
| C | -0.18910700  | -0.93752300 | -1.79791900 | H | -0.49797000 | 1.68420900  | 3.72387200  |
| C | 0.77614700   | -1.73020300 | -1.98722600 | C | 1.41619600  | -2.24211600 | 2.80537300  |
| H | 1.02940600   | -2.68228300 | -2.44604300 | C | 1.52658700  | -2.91303900 | 4.18590500  |
| H | -2.71394000  | 0.31729400  | -0.07029800 | H | 2.57557800  | -2.96326000 | 4.52632200  |
| H | -1.42752200  | 0.63069000  | -2.44590100 | H | 0.95032400  | -2.34044800 | 4.93365900  |
| H | -0.61751600  | 0.93196900  | -0.89154400 | H | 1.12564700  | -3.94181000 | 4.17144500  |
| O | -3.26992200  | 1.48562900  | 1.07090200  | C | 5.05316100  | -2.22917400 | -0.82990500 |
| S | -3.99884200  | 2.59852200  | 0.31173900  | H | 5.18283300  | -1.22030200 | -0.40129800 |
| O | -3.34537700  | 2.89269400  | -1.00743500 | C | 4.06390700  | 2.36703000  | -1.51059300 |
| O | -4.26954400  | 3.78149500  | 1.18359600  | C | 5.34128300  | 3.20873600  | -1.68751200 |
| C | -5.60268600  | 1.86881700  | -0.08904100 | H | 5.12010300  | 4.17912100  | -2.16610000 |
| C | -5.76696400  | 1.17304300  | -1.29715900 | H | 5.82573000  | 3.41384500  | -0.71687900 |
| C | -6.65093700  | 1.92447900  | 0.83926400  | H | 6.06657600  | 2.67534400  | -2.32734200 |
| C | -6.97538000  | 0.52078800  | -1.56402300 | C | 4.55532000  | -2.05503000 | -2.27761900 |
| H | -4.94633200  | 1.15008000  | -2.01992700 | H | 3.58946800  | -1.51876800 | -2.30173300 |
| C | -7.85813600  | 1.26904700  | 0.55968700  | H | 5.28629100  | -1.47683100 | -2.87049900 |
| H | -6.52033200  | 2.48779500  | 1.76814700  | H | 4.41329800  | -3.03329000 | -2.77063400 |
| C | -8.03803300  | 0.54878500  | -0.63789000 | C | 6.42428400  | -2.92597600 | -0.78927900 |
| H | -7.09544000  | -0.03041200 | -2.50351500 | H | 7.16700400  | -2.33594500 | -1.35434300 |
| H | -8.68041000  | 1.32070100  | 1.28311600  | H | 6.79058800  | -3.03618300 | 0.24627700  |
| C | -9.31997500  | -0.19796700 | -0.91601400 | H | 6.38410400  | -3.93153400 | -1.24340700 |
| H | -9.16185400  | -1.29063500 | -0.85108400 | C | -0.05191500 | -2.13296400 | 2.35093600  |
| H | -10.11013100 | 0.07019800  | -0.19484000 | H | -0.12297100 | -1.62690900 | 1.37239100  |
| H | -9.69962600  | 0.01195300  | -1.93164300 | H | -0.51635300 | -3.13117700 | 2.25623300  |

### TS1\_6endo\_TsO

|    |             |             |             |   |             |             |             |
|----|-------------|-------------|-------------|---|-------------|-------------|-------------|
| N  | -2.37142600 | 0.11522900  | -2.91944500 | H | 1.80621300  | -1.21423200 | 2.90480200  |
| C  | -2.90524100 | -1.12595400 | -2.74585000 | C | 3.42719000  | 2.03022700  | -2.87136800 |
| C  | 2.71269700  | 0.05233700  | 0.55614300  | H | 4.14221600  | 1.47367900  | -3.50322900 |
| C  | 4.20484500  | 1.02640000  | 1.96790000  | H | 2.52418400  | 1.40588600  | -2.73924000 |
| C  | 4.36654400  | -0.32868800 | 2.07347500  | H | 3.13006700  | 2.94316500  | -3.41690200 |
| H  | 4.70734600  | 1.85488100  | 2.46001900  | H | 4.35887300  | 1.41223300  | -1.04125000 |
| H  | 5.03714900  | -0.93322200 | 2.67837700  | C | -4.24867000 | -1.23032300 | -2.11060600 |
| N  | 3.44673300  | -0.90429600 | 1.20155600  | C | -5.05773500 | -0.12152500 | -1.79210500 |
| N  | 3.18790300  | 1.23747100  | 1.04049500  | C | -4.67262800 | -2.51469600 | -1.70333500 |
| Au | 1.30030300  | -0.28820500 | -0.85305600 | C | -6.23633000 | -0.27848900 | -1.05650000 |
| C  | 2.66852700  | 2.52756400  | 0.65183400  | H | -4.76414200 | 0.89257000  | -2.07787100 |
| C  | 3.06959700  | 3.06631300  | -0.59117900 | C | -5.84138100 | -2.68476500 | -0.96865700 |
| C  | 1.75567200  | 3.16817600  | 1.51950800  | H | -4.04424200 | -3.37375400 | -1.95477000 |
| C  | 2.51473500  | 4.30452500  | -0.96078200 | C | -6.62148700 | -1.56108300 | -0.61913600 |
| C  | 1.23528000  | 4.40509700  | 1.10036000  | H | -6.82711200 | 0.60420400  | -0.80389800 |
| C  | 1.60481400  | 4.96435300  | -0.12748900 | H | -6.16317900 | -3.67478300 | -0.63135000 |
| H  | 2.79684300  | 4.75029400  | -1.92004600 | O | -7.71709700 | -1.81846600 | 0.15242500  |
|    |             |             |             | C | -8.50281000 | -0.69714900 | 0.57505200  |

|   |             |             |             |   |             |             |             |
|---|-------------|-------------|-------------|---|-------------|-------------|-------------|
| H | -8.95416600 | -0.17309800 | -0.28717000 | H | -2.02960300 | 5.48729000  | -1.33597700 |
| H | -9.30133100 | -1.11609800 | 1.20457200  | H | -0.43507100 | 5.07471000  | -2.02811500 |
| H | -7.90157300 | 0.01583900  | 1.16778100  | C | -0.83421600 | 2.32822800  | -2.28450200 |
| O | -2.25512500 | -2.16895500 | -3.04930400 | H | 0.24741100  | 2.55061400  | -2.25110400 |
| C | -0.96541700 | 0.28402600  | -3.24311400 | H | -0.98687900 | 1.29380200  | -1.92842700 |
| C | -0.13161600 | -0.60107700 | -2.34742800 | H | -1.16705700 | 2.38364100  | -3.33688600 |
| C | -0.26863300 | -1.81260700 | -2.00017300 | C | -4.35677100 | -0.31041900 | -3.01097100 |
| H | -0.18627200 | -2.82075700 | -1.62104400 | C | -5.36623900 | 0.01635500  | -4.12525000 |
| H | -2.79372300 | 0.94760400  | -2.44829100 | H | -6.30310100 | 0.42802400  | -3.71078300 |
| H | -0.76025700 | -0.02707600 | -4.28355100 | H | -4.94079400 | 0.76336300  | -4.81839600 |
| H | -0.71674600 | 1.34459800  | -3.11947100 | H | -5.62318500 | -0.87944200 | -4.71762900 |
| O | -3.13796900 | 2.50791700  | -1.68262500 | C | -5.46561300 | -1.59280200 | 1.83675700  |
| S | -2.30496900 | 2.54991400  | -0.40436400 | H | -5.26799200 | -0.51269200 | 1.95253400  |
| O | -2.34865600 | 3.88508700  | 0.26882700  | C | -2.32303800 | 1.48768400  | 3.33451700  |
| O | -0.93414000 | 1.97292000  | -0.62177600 | C | -2.83819400 | 2.35972700  | 4.49415100  |
| C | -3.14589400 | 1.39805300  | 0.70757000  | H | -2.00412800 | 2.80234300  | 5.06699500  |
| C | -4.21966800 | 1.84412600  | 1.49151600  | H | -3.47016300 | 3.18664400  | 4.12549300  |
| C | -2.78907300 | 0.04109100  | 0.71395300  | H | -3.44138400 | 1.75284400  | 5.19249100  |
| C | -4.94415400 | 0.92568200  | 2.26274700  | C | -4.32123700 | -2.34912700 | 2.53988200  |
| H | -4.47513100 | 2.90808500  | 1.49943700  | H | -3.34451500 | -2.10073200 | 2.08668500  |
| C | -3.52026300 | -0.86798900 | 1.48819500  | H | -4.28543300 | -2.08524300 | 3.61201700  |
| H | -1.94008500 | -0.29517700 | 0.11193300  | H | -4.46458600 | -3.44186200 | 2.46173400  |
| C | -4.61890500 | -0.44589500 | 2.26292600  | C | -6.82043300 | -1.88471400 | 2.50375500  |
| H | -5.78119100 | 1.27830700  | 2.87703100  | H | -6.79652800 | -1.56984400 | 3.56175800  |
| H | -3.24310400 | -1.92827000 | 1.47918500  | H | -7.64163200 | -1.34262500 | 2.00328300  |
| C | -5.45154600 | -1.44246300 | 3.03179100  | H | -7.06423300 | -2.96151800 | 2.48476600  |
| H | -5.97828000 | -0.96758100 | 3.87696200  | C | -3.03414300 | -0.84763500 | -3.59092900 |
| H | -6.21947300 | -1.89732100 | 2.37744300  | H | -2.30880400 | -1.06354200 | -2.78529800 |
| H | -4.83557000 | -2.26759800 | 3.42889900  | H | -3.19836300 | -1.78043300 | -4.15991900 |

### Int2\_5exo\_TsO

|    |             |             |             |   |             |             |             |
|----|-------------|-------------|-------------|---|-------------|-------------|-------------|
| N  | 2.91891700  | -0.69817500 | -1.77220300 | H | -2.09235600 | -0.32855600 | 4.53116700  |
| C  | 3.38928800  | -1.66959500 | -1.01091400 | H | -1.14036900 | -0.32816900 | 3.01406700  |
| C  | -3.16280900 | 0.48498400  | 0.15625300  | H | -0.60149100 | 0.64611100  | 4.41201400  |
| C  | -4.38964900 | 2.38214200  | 0.48165100  | H | -3.20364000 | 1.07099700  | 2.81575500  |
| C  | -5.24469000 | 1.41302600  | 0.03228100  | C | 4.77378800  | -2.01010200 | -0.77210900 |
| H  | -4.55561300 | 3.42030600  | 0.75744800  | C | 5.81610100  | -1.31304100 | -1.42315200 |
| H  | -6.31265900 | 1.42780200  | -0.16867800 | C | 5.09360500  | -3.00755000 | 0.18256600  |
| N  | -4.47709800 | 0.26677300  | -0.15830400 | C | 7.14888100  | -1.60311200 | -1.13596600 |
| N  | -3.12734900 | 1.79821800  | 0.54649400  | H | 5.58850600  | -0.51443600 | -2.13557600 |
| Au | -1.58478700 | -0.80111700 | 0.08619100  | C | 6.41844400  | -3.29679100 | 0.47555600  |
| C  | -1.92430700 | 2.46577500  | 0.98576700  | H | 4.29041500  | -3.54122400 | 0.69703000  |
| C  | -1.52631800 | 2.31325000  | 2.33241600  | C | 7.45948100  | -2.59645900 | -0.18047900 |
| C  | -1.18742500 | 3.21665400  | 0.04058000  | H | 7.93855300  | -1.04802800 | -1.64611500 |
| C  | -0.33540900 | 2.94987000  | 2.72763100  | H | 6.68219700  | -4.06011500 | 1.21276800  |
| C  | 0.00361300  | 3.81923200  | 0.48410000  | O | 8.71555300  | -2.94882800 | 0.18023200  |
| C  | 0.42404700  | 3.68842100  | 1.81370100  | C | 9.81289600  | -2.27113900 | -0.45167800 |
| H  | 0.00487900  | 2.85178700  | 3.76363200  | H | 9.78943200  | -1.18758300 | -0.23855000 |
| H  | 0.63114500  | 4.36232100  | -0.22713700 | H | 10.72010600 | -2.71161000 | -0.01453300 |
| H  | 1.36161800  | 4.15449900  | 2.13291800  | H | 9.81026000  | -2.43889100 | -1.54329700 |
| C  | -4.98182900 | -1.00434300 | -0.61570100 | O | 2.42917900  | -2.36314200 | -0.39194900 |
| C  | -5.47295400 | -1.91401300 | 0.34753100  | C | 1.46089900  | -0.61885900 | -1.65488600 |
| C  | -4.93081800 | -1.29145200 | -1.99742100 | C | 1.16971600  | -1.66820400 | -0.60364700 |
| C  | -5.92785900 | -3.16049800 | -0.11852400 | C | 0.07771500  | -1.97399500 | 0.10518100  |
| C  | -5.40143000 | -2.55153400 | -2.41021700 | H | 0.18967500  | -2.82111900 | 0.79930700  |
| C  | -5.89368800 | -3.47614600 | -1.48212800 | H | 3.49410300  | 0.13318600  | -2.13032300 |
| H  | -6.30493700 | -3.89580000 | 0.59909300  | H | 1.15931400  | 0.39477700  | -1.34628700 |
| H  | -5.37136800 | -2.81204200 | -3.47324200 | H | 0.98403300  | -0.83756600 | -2.62857500 |
| H  | -6.24977800 | -4.45369200 | -1.82361000 | O | 4.30287400  | 1.47531900  | -2.44184200 |
| C  | -1.62402300 | 3.32739500  | -1.41548400 | S | 4.03388400  | 2.57675600  | -1.40234300 |
| H  | -2.69169100 | 3.04973100  | -1.47288900 | O | 2.64472200  | 3.12811000  | -1.51745600 |
| C  | -1.49041000 | 4.75757200  | -1.96505100 | O | 5.13799300  | 3.58010600  | -1.37027900 |
| H  | -1.90985200 | 4.80855300  | -2.98523200 |   |             |             |             |

|   |            |             |            |
|---|------------|-------------|------------|
| C | 4.09263200 | 1.68825800  | 0.17057100 |
| C | 2.90607700 | 1.33058100  | 0.82374700 |
| C | 5.33169300 | 1.26231800  | 0.67873400 |
| C | 2.95780700 | 0.52058300  | 1.96781400 |
| H | 1.94765500 | 1.68800000  | 0.43882000 |
| C | 5.37145000 | 0.45480000  | 1.81978800 |
| H | 6.25648500 | 1.56001300  | 0.17541700 |
| C | 4.18614200 | 0.05583600  | 2.47397100 |
| H | 2.02432900 | 0.24154900  | 2.46999400 |
| H | 6.33893000 | 0.11025200  | 2.20294700 |
| C | 4.24173000 | -0.86194500 | 3.67012700 |
| H | 4.93341000 | -0.48266700 | 4.44339600 |
| H | 3.24762300 | -0.98664000 | 4.13043500 |
| H | 4.60624800 | -1.86504600 | 3.37971000 |

|   |             |             |             |
|---|-------------|-------------|-------------|
| H | -2.83924500 | -5.14359300 | -2.81692400 |
| H | -3.95502800 | -5.19545800 | -1.42581300 |
| H | -4.50353100 | -4.53242200 | -2.99360900 |
| C | -5.38918800 | 0.87622500  | -2.75047400 |
| H | -4.31416800 | 0.94424700  | -2.50645500 |
| H | -5.51525800 | 0.12697400  | -3.55242600 |
| H | -5.71100800 | 1.85636700  | -3.14576100 |
| C | -7.70811400 | 0.33901700  | -1.85556000 |
| H | -7.84656800 | -0.44080100 | -2.62491900 |
| H | -8.30172600 | 0.05402800  | -0.96945700 |
| H | -8.12825800 | 1.27815400  | -2.25645600 |
| C | -2.67629800 | 2.52754700  | 2.84371100  |
| H | -2.16776200 | 2.31367800  | 1.88616400  |
| H | -2.84912400 | 3.61720100  | 2.90265800  |
| H | -1.99555100 | 2.24560600  | 3.66623800  |
| H | -3.75577300 | 0.67403100  | 2.89121800  |
| C | -2.81069900 | -2.33563400 | -3.10834500 |
| H | -3.66715000 | -2.24514800 | -3.80027600 |
| H | -2.50050200 | -1.32006800 | -2.80272500 |
| H | -1.97220100 | -2.79429100 | -3.66226500 |
| H | -4.05233400 | -2.69249500 | -1.39288000 |
| C | 3.93596000  | 2.30921100  | -1.25297800 |
| C | 4.99618300  | 1.38456500  | -1.38601600 |
| C | 4.22892700  | 3.63605600  | -0.85067700 |
| C | 6.30925800  | 1.75656300  | -1.10289000 |
| H | 4.80156300  | 0.35307600  | -1.69483600 |
| C | 5.53642600  | 4.01754700  | -0.58172100 |
| H | 3.41678000  | 4.35835700  | -0.73864600 |
| C | 6.58828700  | 3.07838600  | -0.69297200 |
| H | 7.10188900  | 1.01084200  | -1.18986600 |
| H | 5.77424200  | 5.03660100  | -0.26415900 |
| O | 7.82393700  | 3.54287200  | -0.38408800 |
| C | 8.91313400  | 2.60852500  | -0.41720700 |
| H | 9.07470400  | 2.21631300  | -1.43745700 |
| H | 9.79868600  | 3.17632600  | -0.09777400 |
| H | 8.73474300  | 1.77096800  | 0.27937100  |
| O | 1.64722900  | 2.89651800  | -1.46875000 |
| C | 0.77043800  | 0.28035500  | -1.88717400 |
| C | -0.18828900 | 1.29171800  | -1.28708400 |
| C | 0.28967800  | 2.53665700  | -1.15122800 |
| H | -0.21303000 | 3.42438600  | -0.76569000 |
| H | 2.84084800  | -0.14628400 | -1.49294000 |
| H | 0.61192500  | 0.18338600  | -2.97987100 |
| H | 0.64316300  | -0.72260200 | -1.45128200 |
| O | 3.63481100  | -1.58782000 | -1.36126200 |
| S | 3.75173800  | -1.95160800 | 0.12290300  |
| O | 3.58733500  | -3.42134200 | 0.35181400  |
| O | 2.91651300  | -1.05720200 | 0.98726300  |
| C | 5.47311500  | -1.57385400 | 0.52886600  |
| C | 6.50644700  | -2.11270200 | -0.25648500 |
| C | 5.77278600  | -0.74722700 | 1.61812300  |
| C | 7.83776000  | -1.82515500 | 0.06181300  |
| H | 6.26675300  | -2.74660700 | -1.11586000 |
| C | 7.11199300  | -0.46924300 | 1.92989800  |
| H | 4.95410900  | -0.32109700 | 2.20479500  |
| C | 8.16462800  | -1.00697200 | 1.16555200  |
| H | 8.64292700  | -2.24619500 | -0.55153400 |
| H | 7.34501400  | 0.17805100  | 2.78317400  |
| C | 9.60713900  | -0.73823500 | 1.52138800  |
| H | 9.70279600  | 0.11527900  | 2.21307900  |
| H | 10.06268400 | -1.61603300 | 2.01732400  |
| H | 10.21682600 | -0.52823900 | 0.62491300  |

### Int2\_gendo\_TsO

|    |             |             |             |
|----|-------------|-------------|-------------|
| N  | 2.16897400  | 0.66274000  | -1.63690000 |
| C  | 2.55060600  | 1.90931000  | -1.47381800 |
| C  | -3.41182200 | -0.50944000 | 0.37525000  |
| C  | -4.42099300 | -2.30682100 | 1.35288500  |
| C  | -5.28170300 | -1.24642700 | 1.45171000  |
| H  | -4.50499500 | -3.33861500 | 1.68392500  |
| H  | -6.27416000 | -1.15894800 | 1.88608600  |
| N  | -4.64584700 | -0.16161400 | 0.84989200  |
| N  | -3.28918000 | -1.83634100 | 0.69626300  |
| Au | -1.91338900 | 0.53763800  | -0.51384400 |
| C  | -2.10178400 | -2.59429600 | 0.37195300  |
| C  | -2.04035900 | -3.23248900 | -0.88730900 |
| C  | -1.02038500 | -2.57625300 | 1.28229200  |
| C  | -0.83454600 | -3.87254800 | -1.22822400 |
| C  | 0.16819300  | -3.21307600 | 0.88180200  |
| C  | 0.26355500  | -3.85101300 | -0.36028000 |
| H  | -0.74924800 | -4.36735800 | -2.20139300 |
| H  | 1.04861300  | -3.17890700 | 1.52856800  |
| H  | 1.21472400  | -4.30725200 | -0.65052400 |
| C  | -5.19554900 | 1.16700200  | 0.74660700  |
| C  | -5.97926000 | 1.48363700  | -0.38538600 |
| C  | -4.90683400 | 2.09354300  | 1.77284500  |
| C  | -6.49832400 | 2.78871400  | -0.46351300 |
| C  | -5.45363700 | 3.38382800  | 1.64676300  |
| C  | -6.24321700 | 3.72729900  | 0.54336300  |
| H  | -7.10440300 | 3.07387900  | -1.32929300 |
| H  | -5.24711700 | 4.13090600  | 2.42002200  |
| H  | -6.65674900 | 4.73798500  | 0.46302800  |
| C  | -1.09162700 | -1.86880900 | 2.62983200  |
| H  | -2.12489100 | -1.50653100 | 2.77627400  |
| C  | -0.77218700 | -2.83546500 | 3.78513000  |
| H  | -0.88323800 | -2.32003400 | 4.75566600  |
| H  | -1.44735900 | -3.70932700 | 3.78175700  |
| H  | 0.26505300  | -3.20842300 | 3.72210900  |
| C  | -0.15692600 | -0.64431100 | 2.65593100  |
| H  | 0.89439200  | -0.93321200 | 2.48440400  |
| H  | -0.43518400 | 0.07455100  | 1.86434400  |
| H  | -0.22463800 | -0.13118500 | 3.63240400  |
| C  | -4.00148500 | 1.74839000  | 2.94841200  |
| C  | -4.69238900 | 1.99311200  | 4.30111200  |
| H  | -5.63086600 | 1.41758500  | 4.38421400  |
| H  | -4.02790400 | 1.68665500  | 5.12806300  |
| H  | -4.93555200 | 3.06027900  | 4.44807400  |
| C  | -6.21599900 | 0.48376700  | -1.51027500 |
| H  | -5.85743100 | -0.50433600 | -1.17297400 |
| C  | -3.19391100 | -3.18575100 | -1.88163200 |
| C  | -3.64653200 | -4.59562800 | -2.29976900 |



## TS2\_5exo\_TsO

|    |             |             |             |
|----|-------------|-------------|-------------|
| N  | 3.41240200  | -0.10615100 | -3.16054200 |
| C  | 3.27391400  | 0.13912700  | -1.90164900 |
| C  | -2.29959500 | 0.84779000  | 0.69267100  |
| C  | -4.02272200 | 1.46005500  | 2.05554600  |
| C  | -2.96662400 | 2.28255600  | 2.33596800  |
| H  | -5.03057900 | 1.41533000  | 2.45932200  |
| H  | -2.85692300 | 3.10093700  | 3.04246200  |
| N  | -1.92620400 | 1.89318300  | 1.49552900  |
| N  | -3.59540600 | 0.59215100  | 1.05281100  |
| Au | -1.19662800 | -0.10965800 | -0.69288300 |
| C  | -4.42941000 | -0.38803700 | 0.39841000  |
| C  | -5.25892500 | 0.05321600  | -0.65640900 |
| C  | -4.36530400 | -1.73531100 | 0.82621400  |
| C  | -6.07376000 | -0.90844700 | -1.28176900 |
| C  | -5.20249900 | -2.65278400 | 0.16673800  |
| C  | -6.05032800 | -2.24484400 | -0.87078500 |
| H  | -6.72323300 | -0.60593700 | -2.10944300 |
| H  | -5.18070700 | -3.70562400 | 0.46099300  |
| H  | -6.68920600 | -2.98030700 | -1.37086100 |
| C  | -0.62944400 | 2.52297500  | 1.45428000  |
| C  | -0.38473900 | 3.49586400  | 0.45844100  |
| C  | 0.33395000  | 2.13943700  | 2.41364600  |
| C  | 0.88623000  | 4.09929900  | 0.44649500  |
| C  | 1.58089000  | 2.78858400  | 2.36713000  |
| C  | 1.85776700  | 3.75401800  | 1.39229000  |
| H  | 1.11351800  | 4.84926400  | -0.31817300 |
| H  | 2.34956300  | 2.52163200  | 3.09936500  |
| H  | 2.84192700  | 4.23268300  | 1.36425300  |
| C  | -3.44550700 | -2.17105300 | 1.96111300  |
| H  | -2.55018200 | -1.52515500 | 1.93109800  |
| C  | -4.13451500 | -1.96087400 | 3.32513200  |
| H  | -3.45564800 | -2.25424500 | 4.14544400  |
| H  | -4.42256300 | -0.90740400 | 3.48430200  |
| H  | -5.04830300 | -2.57793400 | 3.40007600  |
| C  | -2.95726200 | -3.62029300 | 1.81966000  |
| H  | -3.76939900 | -4.34828200 | 1.99735100  |
| H  | -2.53118600 | -3.80719200 | 0.82056100  |
| H  | -2.16536100 | -3.81842600 | 2.56017800  |
| C  | 0.06176600  | 1.06707100  | 3.45978400  |
| C  | -0.00236600 | 1.67872800  | 4.87170600  |
| H  | -0.77938800 | 2.46032100  | 4.94106400  |
| H  | -0.23473400 | 0.89919500  | 5.61851800  |
| H  | 0.96281500  | 2.13808700  | 5.15165100  |
| C  | -1.42956200 | 3.89202200  | -0.57756100 |
| H  | -2.35372200 | 3.32555400  | -0.37112300 |
| C  | -5.24252800 | 1.49333700  | -1.15538400 |
| C  | -6.65353800 | 2.10086100  | -1.23294400 |
| H  | -7.28353100 | 1.58225400  | -1.97688400 |
| H  | -7.16934500 | 2.04838900  | -0.25830300 |
| H  | -6.59407000 | 3.16206800  | -1.53269400 |
| C  | -0.96888400 | 3.51112900  | -1.99637900 |
| H  | -0.77693000 | 2.42516400  | -2.06392600 |
| H  | -1.74598400 | 3.77269800  | -2.73644400 |
| H  | -0.04166100 | 4.04288100  | -2.27496300 |
| C  | -1.77562800 | 5.38918000  | -0.48261100 |
| H  | -2.57031000 | 5.64330800  | -1.20633300 |
| H  | -2.13383700 | 5.65657000  | 0.52693300  |
| H  | -0.90029800 | 6.02357700  | -0.70934700 |
| C  | 1.10254700  | -0.06400700 | 3.38626600  |
| H  | 1.12493400  | -0.51855800 | 2.38268800  |
| H  | 2.11553000  | 0.29856100  | 3.63841400  |
| H  | 0.84614600  | -0.86185000 | 4.10532500  |

|   |             |             |             |
|---|-------------|-------------|-------------|
| H | -0.92193100 | 0.61706200  | 3.24287500  |
| C | -4.52025300 | 1.57538600  | -2.51447500 |
| H | -4.46159400 | 2.62389600  | -2.85784600 |
| H | -3.49389900 | 1.17404500  | -2.44275700 |
| H | -5.05822900 | 0.99482200  | -3.28530500 |
| H | -4.66339100 | 2.10081600  | -0.43880300 |
| C | 4.24842200  | 0.70254800  | -0.97527700 |
| C | 5.52711600  | 1.06497600  | -1.44356400 |
| C | 3.94283100  | 0.87599900  | 0.39399400  |
| C | 6.49245700  | 1.57897200  | -0.57472800 |
| H | 5.75904500  | 0.94021300  | -2.50524300 |
| C | 4.89892500  | 1.38614600  | 1.26714200  |
| H | 2.95384500  | 0.60452200  | 0.77008200  |
| C | 6.18189700  | 1.73932600  | 0.79333700  |
| H | 7.47539500  | 1.85295700  | -0.96419100 |
| H | 4.67796200  | 1.52091500  | 2.32998600  |
| O | 7.04151600  | 2.22607300  | 1.72896500  |
| C | 8.35306000  | 2.60470900  | 1.29405400  |
| H | 8.31067500  | 3.41512800  | 0.54359400  |
| H | 8.87060900  | 2.96641700  | 2.19419300  |
| H | 8.90373000  | 1.74222400  | 0.87619400  |
| O | 2.02017100  | -0.16311100 | -1.34846200 |
| C | 2.12795900  | -0.65180700 | -3.60269000 |
| C | 1.24262900  | -0.65876000 | -2.37250400 |
| C | -0.05028400 | -1.05867300 | -2.16040900 |
| H | -0.53615200 | -1.39286800 | -3.09195300 |
| H | -0.11719700 | -2.18315100 | -1.34619200 |
| H | 1.69741100  | -0.03532800 | -4.41430900 |
| H | 2.25432100  | -1.67209100 | -4.01267100 |
| O | -0.25124600 | -3.37009300 | -0.91018500 |
| S | 0.61745300  | -3.66340600 | 0.36749200  |
| O | 0.48304900  | -5.10668200 | 0.69934100  |
| O | 0.35656700  | -2.68753500 | 1.46320500  |
| C | 2.29189800  | -3.34815000 | -0.20569800 |
| C | 3.22462500  | -2.78469500 | 0.67364900  |
| C | 2.65601600  | -3.67787800 | -1.52185900 |
| C | 4.52811800  | -2.53517500 | 0.22428000  |
| H | 2.92075200  | -2.51723000 | 1.68966400  |
| C | 3.95927300  | -3.41740800 | -1.95600900 |
| H | 1.91583500  | -4.10946500 | -2.20142000 |
| C | 4.91379600  | -2.83615400 | -1.09501800 |
| H | 5.25288500  | -2.07120400 | 0.90166800  |
| H | 4.24202000  | -3.65505500 | -2.98788400 |
| C | 6.29530500  | -2.50902800 | -1.60089000 |
| H | 6.80885800  | -3.40832100 | -1.98656500 |
| H | 6.24144400  | -1.78538900 | -2.43445500 |
| H | 6.92229700  | -2.06791200 | -0.80908700 |

## TS2\_6endo\_TsO

|    |             |             |             |
|----|-------------|-------------|-------------|
| N  | -2.84730700 | 0.68380200  | -2.32065600 |
| C  | -3.44442600 | -0.36163500 | -1.88535500 |
| C  | 1.47624300  | 1.27306500  | 1.21846700  |
| C  | 2.19066400  | 3.06470800  | 2.43489800  |
| C  | 2.41493400  | 1.94223000  | 3.18395400  |
| H  | 2.38400600  | 4.11578500  | 2.63251900  |
| H  | 2.84051900  | 1.80991500  | 4.17500000  |
| N  | 1.97152600  | 0.85962900  | 2.42540500  |
| N  | 1.61756300  | 2.63500800  | 1.24204800  |
| Au | 0.54202600  | 0.27345300  | -0.25713700 |
| C  | 1.17267900  | 3.48608500  | 0.16394000  |
| C  | 2.07453900  | 3.77074100  | -0.88551500 |
| C  | -0.16281300 | 3.94907500  | 0.18522100  |
| C  | 1.59587700  | 4.55933200  | -1.94783300 |

|   |             |             |             |
|---|-------------|-------------|-------------|
| C | -0.58821800 | 4.73463400  | -0.90128800 |
| C | 0.28007000  | 5.03595400  | -1.95715900 |
| H | 2.26288100  | 4.78983900  | -2.78460000 |
| H | -1.61928900 | 5.10161500  | -0.92424500 |
| H | -0.07397100 | 5.64251900  | -2.79718000 |
| C | 2.00818500  | -0.51468900 | 2.86175900  |
| C | 3.23742500  | -1.20974600 | 2.78504300  |
| C | 0.82030000  | -1.09567100 | 3.36196700  |
| C | 3.25296400  | -2.54126900 | 3.23950700  |
| C | 0.89458700  | -2.42928800 | 3.80492800  |
| C | 2.09629600  | -3.14468200 | 3.74684900  |
| H | 4.18692600  | -3.10960500 | 3.19755900  |
| H | -0.00478600 | -2.91025600 | 4.20321600  |
| H | 2.13183100  | -4.18144100 | 4.09746400  |
| C | -1.13623000 | 3.59249000  | 1.30210100  |
| H | -0.57962300 | 3.04337000  | 2.08146500  |
| C | -1.72997300 | 4.85035100  | 1.96043700  |
| H | -2.39024800 | 4.56585100  | 2.79861200  |
| H | -0.93885100 | 5.51084900  | 2.35658300  |
| H | -2.33350200 | 5.43695200  | 1.24552600  |
| C | -2.24319200 | 2.65743100  | 0.77864800  |
| H | -2.83616100 | 3.14092000  | -0.01764900 |
| H | -1.80970100 | 1.73286300  | 0.35855600  |
| H | -2.93210100 | 2.37918200  | 1.59651400  |
| C | -0.49520600 | -0.33263000 | 3.46168100  |
| C | -0.89182600 | -0.12036400 | 4.93451700  |
| H | -0.10684100 | 0.42500800  | 5.48728800  |
| H | -1.82672500 | 0.46387900  | 4.99974000  |
| H | -1.05871000 | -1.08410000 | 5.44786600  |
| C | 4.51514700  | -0.55520300 | 2.27513900  |
| H | 4.24648400  | 0.41087300  | 1.81383500  |
| C | 3.49424700  | 3.22045400  | -0.91455900 |
| C | 4.53619600  | 4.34440800  | -1.05836500 |
| H | 4.42933200  | 4.87669300  | -2.02003700 |
| H | 4.44465300  | 5.08879900  | -0.24782200 |
| H | 5.55667700  | 3.92429000  | -1.02308200 |
| C | 5.21822400  | -1.39655200 | 1.19547000  |
| H | 4.56152600  | -1.57775500 | 0.32820100  |
| H | 6.11442500  | -0.86123700 | 0.83479300  |
| H | 5.55532700  | -2.37202900 | 1.58900800  |
| C | 5.46642100  | -0.26237300 | 3.45241600  |
| H | 6.37339100  | 0.25504100  | 3.09305700  |
| H | 4.98813200  | 0.37478500  | 4.21691900  |
| H | 5.78278200  | -1.19841900 | 3.94674300  |
| C | -1.61504500 | -1.03587400 | 2.67452000  |
| H | -1.33367200 | -1.15585100 | 1.61392000  |
| H | -1.83748200 | -2.03594300 | 3.08779200  |
| H | -2.54432100 | -0.44056600 | 2.71526400  |
| H | -0.35447800 | 0.66307300  | 3.00855300  |
| C | 3.64329300  | 2.17010600  | -2.03194900 |
| H | 4.65506800  | 1.72844600  | -2.01287300 |
| H | 2.91573600  | 1.34953300  | -1.91222600 |
| H | 3.48751400  | 2.62407800  | -3.02704600 |
| H | 3.68614400  | 2.71209700  | 0.04602400  |
| C | -4.87117300 | -0.40343000 | -1.52574000 |
| C | -5.67585800 | 0.73224600  | -1.74898700 |
| C | -5.46296400 | -1.54931400 | -0.94739200 |
| C | -7.03005400 | 0.73946400  | -1.40732700 |
| H | -5.21785800 | 1.61900000  | -2.19644400 |
| C | -6.81329700 | -1.55475800 | -0.60545000 |
| H | -4.85477900 | -2.43819800 | -0.76323800 |
| C | -7.60956600 | -0.41151800 | -0.83138400 |
| H | -7.62637400 | 1.63581300  | -1.59214300 |

|   |              |             |             |
|---|--------------|-------------|-------------|
| H | -7.27857100  | -2.43794000 | -0.15779600 |
| O | -8.91647600  | -0.51838200 | -0.46226400 |
| C | -9.76469800  | 0.61148700  | -0.69503300 |
| H | -9.81869200  | 0.86050200  | -1.77062800 |
| H | -10.76135800 | 0.31180400  | -0.33958700 |
| H | -9.42396600  | 1.49674700  | -0.12722700 |
| O | -2.80922500  | -1.60146400 | -1.64759300 |
| C | -1.42830000  | 0.54835300  | -2.67724500 |
| C | -0.68647500  | -0.45828700 | -1.79810600 |
| C | -1.45937100  | -1.51036800 | -1.39652400 |
| H | -1.11936200  | -2.37644200 | -0.82144500 |
| H | 0.51641300   | -0.87543300 | -2.43890300 |
| H | -1.36782500  | 0.23022900  | -3.73985000 |
| H | -0.96360000  | 1.54684200  | -2.62797100 |
| O | 1.35527300   | -1.22251600 | -3.27423000 |
| S | 2.44349500   | -2.16787100 | -2.63395900 |
| O | 3.29993200   | -1.42977300 | -1.66439100 |
| O | 3.11812000   | -2.91379400 | -3.72618900 |
| C | 1.44454300   | -3.32854100 | -1.69296600 |
| C | 1.46582800   | -3.30424600 | -0.29316400 |
| C | 0.59355800   | -4.20672400 | -2.38474500 |
| C | 0.61891500   | -4.16740400 | 0.41814500  |
| H | 2.13278800   | -2.61630200 | 0.23249600  |
| C | -0.24204500  | -5.06231600 | -1.66088500 |
| H | 0.58544900   | -4.21493100 | -3.47872200 |
| C | -0.24602300  | -5.05519800 | -0.24873400 |
| H | 0.63179800   | -4.14299300 | 1.51253300  |
| H | -0.90967700  | -5.74558900 | -2.19766300 |
| C | -1.14757700  | -5.98839900 | 0.52063300  |
| H | -2.18363100  | -5.95376300 | 0.14023800  |
| H | -0.80711400  | -7.03633600 | 0.42742000  |
| H | -1.16620100  | -5.73790900 | 1.59414200  |

## HTFA

|   |             |             |             |
|---|-------------|-------------|-------------|
| C | 0.60616000  | -0.00073200 | 0.00001100  |
| C | -0.93744000 | 0.16141800  | 0.00005000  |
| O | -1.49859600 | 1.23862300  | -0.00000100 |
| O | -1.51991900 | -1.05027800 | -0.00001600 |
| H | -2.49805300 | -0.91032300 | -0.00004900 |
| F | 1.00687700  | -0.68291100 | 1.09735000  |
| F | 1.19318500  | 1.20611600  | -0.00004000 |
| F | 1.00682600  | -0.68298200 | -1.09730300 |

## IPrAuTFA

|    |             |             |             |
|----|-------------|-------------|-------------|
| C  | 1.13930600  | 0.03376600  | 0.26106700  |
| C  | 3.09745500  | 0.78624200  | 1.14312300  |
| C  | 3.14711700  | -0.58112500 | 1.13898400  |
| H  | 3.81296900  | 1.53374400  | 1.47508400  |
| H  | 3.91361000  | -1.27844400 | 1.46633900  |
| N  | 1.94320200  | -1.02145600 | 0.59604600  |
| N  | 1.86428400  | 1.14218900  | 0.60358000  |
| Au | -0.68521400 | -0.04321600 | -0.46394900 |
| C  | 1.38437300  | 2.49364800  | 0.44395900  |
| C  | 1.68359500  | 3.17332300  | -0.75744600 |
| C  | 0.61690100  | 3.05898100  | 1.48649800  |
| C  | 1.19048700  | 4.48337600  | -0.89356700 |
| C  | 0.15271500  | 4.37373700  | 1.29962400  |
| C  | 0.43584300  | 5.07852200  | 0.12416700  |
| H  | 1.39403700  | 5.03970700  | -1.81429200 |
| H  | -0.44681100 | 4.84511300  | 2.08495000  |
| H  | 0.05974200  | 6.09900300  | -0.00258600 |
| C  | 1.55810400  | -2.40302200 | 0.43711400  |



|   |             |             |             |   |             |             |             |
|---|-------------|-------------|-------------|---|-------------|-------------|-------------|
| C | 4.32412200  | 1.27907900  | -0.86570200 | H | -0.17131800 | 3.44282800  | 4.05863900  |
| C | 5.38854600  | -0.89765300 | -0.88183300 | H | -1.74212300 | 2.85285600  | 3.43857200  |
| C | 5.33057200  | 1.76997400  | -0.02452300 | C | -0.86007100 | 0.54902500  | 2.20473900  |
| H | 3.52289400  | 1.96522800  | -1.16258100 | H | -1.82366800 | 0.88391100  | 1.78003000  |
| C | 6.39160800  | -0.42585700 | -0.03972400 | H | -0.33941300 | -0.04748000 | 1.43379000  |
| H | 5.39566300  | -1.93349600 | -1.23318300 | H | -1.07303600 | -0.11256000 | 3.06380300  |
| C | 6.36852400  | 0.91659400  | 0.39999400  | C | 2.26729000  | -2.61757400 | 2.78915100  |
| H | 5.28935800  | 2.81185800  | 0.30121700  | C | 2.66796700  | -3.11899000 | 4.18856000  |
| H | 7.20910400  | -1.07332200 | 0.29233100  | H | 3.59529200  | -2.63333500 | 4.53930200  |
| O | 7.39003000  | 1.28637400  | 1.22485500  | H | 1.86793400  | -2.89777400 | 4.91661200  |
| C | 7.38769400  | 2.63179800  | 1.71265200  | H | 2.83470700  | -4.21065100 | 4.19327400  |
| H | 6.48193700  | 2.84321200  | 2.31058200  | C | 5.64162500  | -0.87235500 | -0.67607300 |
| H | 8.27736200  | 2.71705600  | 2.35378000  | H | 5.29220000  | 0.07646800  | -0.23299700 |
| H | 7.46149900  | 3.36284400  | 0.88649200  | C | 3.12868800  | 2.86610600  | -1.27192800 |
| O | 3.36523900  | -1.85036100 | -2.57525700 | C | 4.00633400  | 4.13057000  | -1.31613100 |
| C | 1.17535500  | -0.40973600 | -3.35599000 | H | 3.48815100  | 4.96185500  | -1.82562200 |
| C | -0.14590500 | 0.12693700  | -3.00020100 | H | 4.27416800  | 4.47041300  | -0.30052200 |
| C | -1.26445900 | 0.67781300  | -2.92814200 | H | 4.94167100  | 3.92885600  | -1.86751900 |
| H | -2.13966300 | 1.27225500  | -3.15514100 | C | 5.15628700  | -0.90459300 | -2.13856500 |
| H | 2.12861600  | 1.13343200  | -2.24126900 | H | 4.05367000  | -0.86092800 | -2.19313400 |
| H | 1.33102500  | -0.17444600 | -4.43088800 | H | 5.56498800  | -0.04594200 | -2.70031400 |
| H | 1.20114500  | -1.51093700 | -3.26026700 | H | 5.48476300  | -1.82983800 | -2.64499500 |
| O | 1.52271000  | 2.77146000  | -2.09810000 | C | 7.17814200  | -0.87624200 | -0.59848200 |
| C | 0.77874800  | 2.88785100  | -1.07716400 | H | 7.58672900  | -0.00232100 | -1.13541300 |
| O | 0.85693200  | 2.35245300  | 0.05573400  | H | 7.52949700  | -0.83024300 | 0.44692700  |
| C | -0.43766000 | 3.85680500  | -1.25321100 | H | 7.60913000  | -1.78138600 | -1.06122400 |
| F | -0.57490300 | 4.34058200  | -2.51603800 | C | 0.94518000  | -3.25579300 | 2.32434100  |
| F | -1.62411100 | 3.23654100  | -0.94448500 | H | 0.64379900  | -2.87293200 | 1.33277400  |
| F | -0.33646900 | 4.93276700  | -0.41772100 | H | 1.03180700  | -4.35455300 | 2.25241300  |

### TS1\_5exo\_TFA

|    |             |             |             |   |              |             |             |
|----|-------------|-------------|-------------|---|--------------|-------------|-------------|
| N  | -2.91769000 | -0.31341300 | -1.39839200 | C | 2.80594500   | 2.36109400  | -2.68992000 |
| C  | -3.42400200 | -1.48862400 | -1.84350500 | H | 3.73660500   | 2.15460500  | -3.24757700 |
| C  | 2.53655600  | 0.12727600  | 0.65151800  | H | 2.21276300   | 1.42951300  | -2.65161100 |
| C  | 3.44813900  | 1.59424300  | 2.12770100  | H | 2.22844300   | 3.10841500  | -3.26180400 |
| C  | 4.14398500  | 0.42029300  | 2.23199500  | H | 3.71133200   | 2.07565700  | -0.76721700 |
| H  | 3.55380900  | 2.54575000  | 2.64216600  | C | -4.74115800  | -1.95149700 | -1.33239500 |
| H  | 4.98312500  | 0.12899600  | 2.85822300  | C | -5.54964400  | -1.18630700 | -0.46850700 |
| N  | 3.57128100  | -0.46177400 | 1.32000900  | C | -5.20131000  | -3.22107000 | -1.74720900 |
| N  | 2.46795300  | 1.39350000  | 1.15881500  | C | -6.78308700  | -1.67377200 | -0.02215500 |
| Au | 1.35860400  | -0.71736000 | -0.74685800 | H | -5.22853500  | -0.19513500 | -0.12878000 |
| C  | 1.53567400  | 2.39689600  | 0.70070400  | C | -6.42627200  | -3.71533200 | -1.31109900 |
| C  | 1.85120800  | 3.10954700  | -0.47702600 | H | -4.57186400  | -3.80940400 | -2.42112100 |
| C  | 0.35317900  | 2.61279700  | 1.44713000  | C | -7.22935600  | -2.94367500 | -0.44184400 |
| C  | 0.92247000  | 4.07380100  | -0.91324700 | H | -7.38858200  | -1.05878200 | 0.64743800  |
| C  | -0.52532000 | 3.60168200  | 0.97551900  | H | -6.78857200  | -4.69809400 | -1.62769500 |
| C  | -0.25221700 | 4.31771200  | -0.19621800 | O | -8.41037200  | -3.51136500 | -0.06875300 |
| H  | 1.12689000  | 4.63572700  | -1.83049800 | C | -9.25710300  | -2.76093900 | 0.80913300  |
| H  | -1.44771500 | 3.80177700  | 1.52318500  | H | -9.57096800  | -1.80608300 | 0.34885100  |
| H  | -0.97985400 | 5.04976300  | -0.55662900 | H | -10.14148600 | -3.39258300 | 0.97805900  |
| C  | 4.00807700  | -1.81429700 | 1.07291800  | H | -8.76025800  | -2.55988800 | 1.77602800  |
| C  | 5.02252400  | -2.02119100 | 0.11079200  | O | -2.75897700  | -2.16478400 | -2.67800300 |
| C  | 3.37670400  | -2.86428700 | 1.77552600  | C | -1.68630700  | 0.11086100  | -2.03200700 |
| C  | 5.41088700  | -3.35032700 | -0.13525500 | C | -0.74533100  | -1.01050600 | -2.13350300 |
| C  | 3.80495800  | -4.17399500 | 1.49126400  | C | 0.23991700   | -1.80225100 | -2.15202200 |
| C  | 4.80993900  | -4.41491700 | 0.54744200  | H | 0.53693900   | -2.77985600 | -2.52300100 |
| H  | 6.18648700  | -3.55195800 | -0.88084000 | H | -3.35536800  | 0.34183500  | -0.69495100 |
| H  | 3.33583300  | -5.01383500 | 2.01372800  | H | -1.86482500  | 0.50226800  | -3.05455000 |
| H  | 5.12479300  | -5.44240600 | 0.33794300  | H | -1.25523800  | 0.94033100  | -1.44718700 |
| C  | -0.00637800 | 1.75511500  | 2.65491600  | O | -3.87374200  | 1.49429300  | 0.43484900  |
| H  | 0.93137200  | 1.36084800  | 3.08719800  | C | -3.62057700  | 2.61290200  | -0.12742700 |
| C  | -0.73317800 | 2.54107400  | 3.75847600  | O | -3.06669300  | 2.86346300  | -1.21801400 |
| H  | -0.85806700 | 1.90352500  | 4.65093800  | C | -4.12553500  | 3.83626400  | 0.70267500  |

|   |             |            |            |
|---|-------------|------------|------------|
| F | -5.47231700 | 4.00199100 | 0.56239400 |
| F | -3.53908500 | 5.00919000 | 0.32976700 |
| F | -3.88381100 | 3.69054100 | 2.04430200 |

|   |             |             |             |
|---|-------------|-------------|-------------|
| C | 4.46625700  | -1.53063200 | -2.64402000 |
| H | 3.37557700  | -1.47905900 | -2.47818000 |
| H | 4.72178000  | -0.85864900 | -3.48255300 |
| H | 4.71350600  | -2.56331800 | -2.94839800 |
| C | 6.76095800  | -1.17046700 | -1.60863100 |
| H | 7.03888800  | -0.48576700 | -2.42907200 |
| H | 7.31639200  | -0.86512800 | -0.70472800 |
| H | 7.10273900  | -2.18199800 | -1.88999600 |
| C | 1.31662400  | -2.30042900 | 2.99566100  |
| H | 0.85157400  | -2.05200400 | 2.02468400  |
| H | 1.31017000  | -3.39936000 | 3.10820300  |
| H | 0.68599400  | -1.87230400 | 3.79418500  |
| H | 2.68439400  | -0.64672800 | 2.96020200  |
| C | 1.88846200  | 1.50785000  | -3.46569700 |
| H | 2.67337300  | 1.16832800  | -4.16447500 |
| H | 1.40734500  | 0.61421200  | -3.02805800 |
| H | 1.12806800  | 2.05269300  | -4.05232100 |
| H | 3.23958600  | 1.78121600  | -1.82353400 |
| C | -4.67556200 | -1.90874800 | -0.97566600 |
| C | -5.40126100 | -0.72217200 | -0.74968200 |
| C | -5.19752600 | -3.12162100 | -0.47228000 |
| C | -6.60298300 | -0.73556900 | -0.03339000 |
| H | -5.03325900 | 0.24296200  | -1.11043000 |
| C | -6.39912500 | -3.15152000 | 0.22804700  |
| H | -4.63017400 | -4.04109200 | -0.64188000 |
| C | -7.11173200 | -1.95390100 | 0.45950200  |
| H | -7.12464100 | 0.20765000  | 0.14381700  |
| H | -6.80602600 | -4.08871700 | 0.61964000  |
| O | -8.27057500 | -2.08113700 | 1.16527200  |
| C | -9.00208800 | -0.88461400 | 1.45429500  |
| H | -9.33135600 | -0.37704500 | 0.52891600  |
| H | -9.88461500 | -1.20787700 | 2.02561100  |
| H | -8.40486700 | -0.18418100 | 2.06644500  |
| O | -2.75038700 | -3.06317200 | -1.81359300 |
| C | -1.49052600 | -0.75527500 | -2.67547500 |
| C | -0.55125100 | -1.43724700 | -1.70720100 |
| C | -0.62591700 | -2.53248600 | -1.07947100 |
| H | -0.49169100 | -3.41576600 | -0.47296900 |
| H | -3.16122200 | 0.13537800  | -1.79103100 |
| H | -1.40780800 | -1.29807300 | -3.63472900 |
| H | -1.22272300 | 0.29730600  | -2.83830700 |
| O | -3.38059700 | 1.72136800  | -1.23356000 |
| O | -2.32385100 | 0.85898500  | 0.61098400  |
| C | -3.05310200 | 1.66712200  | -0.00146100 |
| C | -3.76689800 | 2.76262500  | 0.85091400  |
| F | -3.25847100 | 2.88907400  | 2.11117200  |
| F | -5.09558900 | 2.46506700  | 0.99114000  |
| F | -3.69910500 | 4.00097700  | 0.27522500  |

### TS1\_gendo\_TFA

|    |             |             |             |
|----|-------------|-------------|-------------|
| N  | -2.84641200 | -0.79962100 | -2.16866200 |
| C  | -3.36319300 | -1.96323700 | -1.68309000 |
| C  | 2.51144900  | 0.35565400  | 0.32369700  |
| C  | 3.76127600  | 2.09459900  | 1.08691300  |
| C  | 4.46253700  | 0.94466500  | 1.33230600  |
| H  | 3.99545200  | 3.13780400  | 1.28235600  |
| H  | 5.43080300  | 0.77370400  | 1.79542700  |
| N  | 3.68259100  | -0.10553600 | 0.85419200  |
| N  | 2.57072300  | 1.71350000  | 0.47603500  |
| Au | 1.02629400  | -0.67355600 | -0.58308100 |
| C  | 1.52374200  | 2.59618500  | 0.01561100  |
| C  | 1.44522600  | 2.86842700  | -1.36906000 |
| C  | 0.60072800  | 3.09762700  | 0.96303400  |
| C  | 0.35482900  | 3.64138100  | -1.80982000 |
| C  | -0.46042600 | 3.87210200  | 0.46531200  |
| C  | -0.59584900 | 4.12375000  | -0.90547700 |
| H  | 0.25223100  | 3.86314800  | -2.87706500 |
| H  | -1.20751600 | 4.26467300  | 1.15704300  |
| H  | -1.45718300 | 4.69383600  | -1.26607900 |
| C  | 4.05343300  | -1.49985800 | 0.87624800  |
| C  | 4.82094100  | -2.00174900 | -0.19879100 |
| C  | 3.60840200  | -2.29827100 | 1.95294100  |
| C  | 5.15072800  | -3.36881800 | -0.16914900 |
| C  | 3.96396000  | -3.65945100 | 1.93035400  |
| C  | 4.72769800  | -4.18885100 | 0.88375300  |
| H  | 5.73776800  | -3.79671700 | -0.98809600 |
| H  | 3.63219900  | -4.31149600 | 2.74445400  |
| H  | 4.99168000  | -5.25144300 | 0.88610200  |
| C  | 0.71499700  | 2.76813600  | 2.44916200  |
| H  | 1.79045700  | 2.70194100  | 2.69924100  |
| C  | 0.09706600  | 3.84779900  | 3.35220200  |
| H  | 0.34590500  | 3.63594200  | 4.40645600  |
| H  | 0.47018500  | 4.85791500  | 3.10847100  |
| H  | -1.00372300 | 3.85645800  | 3.27308300  |
| C  | 0.07549900  | 1.39694300  | 2.75660700  |
| H  | -0.99153500 | 1.39754900  | 2.47959200  |
| H  | 0.55432300  | 0.58631100  | 2.18257900  |
| H  | 0.17378000  | 1.16589100  | 3.83292000  |
| C  | 2.74969700  | -1.74183900 | 3.08178200  |
| C  | 3.37199900  | -2.01607500 | 4.46250300  |
| H  | 4.39391100  | -1.60424900 | 4.53373400  |
| H  | 2.75858800  | -1.54944000 | 5.25301900  |
| H  | 3.42582100  | -3.09774700 | 4.67866000  |
| C  | 5.24087400  | -1.12811700 | -1.37414900 |
| H  | 4.97331100  | -0.08317300 | -1.14001500 |
| C  | 2.49757400  | 2.39380900  | -2.36499700 |
| C  | 3.24596300  | 3.59599500  | -2.97202200 |
| H  | 2.56264700  | 4.24442900  | -3.54858100 |
| H  | 3.71622800  | 4.21450500  | -2.18780900 |
| H  | 4.03871000  | 3.24762500  | -3.65767300 |

### Int2\_Sexo\_TFA

|    |             |             |             |
|----|-------------|-------------|-------------|
| N  | 3.34775300  | -0.52283800 | 0.43704500  |
| C  | 3.67577200  | -1.76660800 | 0.16867000  |
| C  | -2.85857700 | 0.40379600  | 0.19532500  |
| C  | -3.84589000 | 2.44250200  | 0.48601600  |
| C  | -4.81425200 | 1.57417900  | 0.06082800  |
| H  | -3.88286600 | 3.49923500  | 0.73739300  |
| H  | -5.87359000 | 1.71355300  | -0.13834200 |
| N  | -4.19178900 | 0.33912900  | -0.10932500 |
| N  | -2.66402400 | 1.71127600  | 0.56074700  |
| Au | -1.40340700 | -1.01297700 | 0.09722900  |
| C  | -1.37488000 | 2.24022800  | 0.94033600  |
| C  | -0.99111500 | 2.16974200  | 2.29873700  |
| C  | -0.53598500 | 2.75915000  | -0.07191500 |

|   |             |             |             |
|---|-------------|-------------|-------------|
| C | 0.29226600  | 2.64188800  | 2.63202100  |
| C | 0.73547600  | 3.22011800  | 0.31593000  |
| C | 1.14835400  | 3.15852100  | 1.65181700  |
| H | 0.62601700  | 2.59201300  | 3.67354400  |
| H | 1.42711500  | 3.59730500  | -0.44136200 |
| H | 2.15042000  | 3.50686400  | 1.92024000  |
| C | -4.83935300 | -0.85453700 | -0.59527800 |
| C | -5.42475500 | -1.73554200 | 0.34045800  |
| C | -4.83728000 | -1.09468100 | -1.98796500 |
| C | -6.03087100 | -2.90068600 | -0.16371000 |
| C | -5.45586900 | -2.27462700 | -2.43864100 |
| C | -6.04767200 | -3.16766700 | -1.53767000 |
| H | -6.48665900 | -3.61137100 | 0.53299300  |
| H | -5.46432500 | -2.49783200 | -3.51038900 |
| H | -6.52086000 | -4.08252100 | -1.90933100 |
| C | -0.94347100 | 2.78891300  | -1.53946700 |
| H | -1.99460000 | 2.45938900  | -1.61391200 |
| C | -0.86236200 | 4.21184700  | -2.12097000 |
| H | -1.21953800 | 4.21672400  | -3.16600200 |
| H | -1.48201300 | 4.92020400  | -1.54345000 |
| H | 0.17499300  | 4.58986000  | -2.12112300 |
| C | -0.08662100 | 1.80273400  | -2.35692600 |
| H | 0.98488600  | 2.06517400  | -2.30773900 |
| H | -0.20562200 | 0.77250300  | -1.97526700 |
| H | -0.39567700 | 1.81241500  | -3.41766400 |
| C | -4.16407600 | -0.14925600 | -2.97525500 |
| C | -5.12533900 | 0.29786500  | -4.09041500 |
| H | -6.02915300 | 0.77850300  | -3.67693500 |
| H | -4.62440100 | 1.02482200  | -4.75357000 |
| H | -5.44961100 | -0.55303300 | -4.71533600 |
| C | -5.36673300 | -1.47710800 | 1.84042000  |
| H | -4.97094600 | -0.45876600 | 1.99693800  |
| C | -1.89374000 | 1.56712100  | 3.36823000  |
| C | -2.13914000 | 2.54747100  | 4.52881100  |
| H | -1.20331400 | 2.78537400  | 5.06450400  |
| H | -2.57355200 | 3.49671400  | 4.16955700  |
| H | -2.83867500 | 2.10605400  | 5.26064000  |
| C | -4.38905300 | -2.45959000 | 2.51321500  |
| H | -3.38458000 | -2.39099200 | 2.05876300  |
| H | -4.29741100 | -2.23537600 | 3.59106500  |
| H | -4.73991200 | -3.50213500 | 2.41032600  |
| C | -6.75768200 | -1.53681600 | 2.49446500  |
| H | -6.68251800 | -1.29119700 | 3.56842300  |
| H | -7.45560900 | -0.82006500 | 2.02747700  |
| H | -7.20387000 | -2.54390000 | 2.41542200  |
| C | -2.89229700 | -0.79417500 | -3.55877000 |
| H | -2.19074000 | -1.08372100 | -2.75575500 |
| H | -3.13642000 | -1.70052400 | -4.14139200 |
| H | -2.37478700 | -0.08620800 | -4.23015300 |
| H | -3.85276700 | 0.75601400  | -2.42613400 |
| C | -1.31383400 | 0.23321200  | 3.87617700  |
| H | -1.99709300 | -0.23108000 | 4.60970800  |
| H | -1.16844000 | -0.47678000 | 3.04210100  |
| H | -0.33719300 | 0.38501800  | 4.37004600  |
| H | -2.87229900 | 1.34699800  | 2.90742000  |
| C | 5.01226000  | -2.30627700 | 0.01633000  |
| C | 6.13995100  | -1.45633900 | 0.06750900  |
| C | 5.19613900  | -3.69283200 | -0.20588600 |
| C | 7.42438500  | -1.97261000 | -0.09759800 |
| H | 6.01497700  | -0.37896200 | 0.22170700  |
| C | 6.47320200  | -4.21212300 | -0.36842600 |
| H | 4.32716800  | -4.35449900 | -0.25095100 |
| C | 7.59971500  | -3.35749600 | -0.31729700 |

|   |             |             |             |
|---|-------------|-------------|-------------|
| H | 8.28061100  | -1.29624200 | -0.05906800 |
| H | 6.63230400  | -5.28006000 | -0.54175600 |
| O | 8.79923600  | -3.96146700 | -0.49413000 |
| C | 9.97610600  | -3.13953600 | -0.47146400 |
| H | 10.10427100 | -2.65134000 | 0.51102200  |
| H | 10.81600500 | -3.82498300 | -0.65280700 |
| H | 9.94577300  | -2.37504000 | -1.26821300 |
| O | 2.61773300  | -2.57685100 | 0.01386500  |
| C | 1.89522000  | -0.36245400 | 0.42154000  |
| C | 1.41677700  | -1.77065800 | 0.13646800  |
| C | 0.18754700  | -2.28179900 | -0.01449900 |
| H | 0.12700900  | -3.35940300 | -0.22654100 |
| H | 4.00369200  | 0.35293900  | 0.47318600  |
| H | 1.53707000  | 0.02882300  | 1.39045300  |
| H | 1.62063600  | 0.36551800  | -0.36129900 |
| O | 4.75774700  | 1.68661400  | 0.49747800  |
| O | 3.40885100  | 2.07205100  | -1.31540100 |
| C | 4.24141000  | 2.38931000  | -0.44163300 |
| C | 4.68532600  | 3.88269300  | -0.43164400 |
| F | 3.72987700  | 4.64428800  | 0.20143700  |
| F | 4.81651800  | 4.38418400  | -1.68713600 |
| F | 5.85648600  | 4.10076400  | 0.21878700  |

### Int2\_6endo\_TFA

|    |             |             |             |
|----|-------------|-------------|-------------|
| N  | -3.05665600 | -0.64510500 | -0.64039300 |
| C  | -3.43112600 | -1.89588100 | -0.77006000 |
| C  | 2.81487600  | 0.38481200  | 0.34848000  |
| C  | 3.97415500  | 2.05388400  | 1.38653500  |
| C  | 4.88786000  | 1.21320200  | 0.80944100  |
| H  | 4.09763400  | 2.96230000  | 1.97042600  |
| H  | 5.97416600  | 1.23560500  | 0.78309900  |
| N  | 4.15932200  | 0.20335000  | 0.18254900  |
| N  | 2.71897000  | 1.53216700  | 1.09350600  |
| Au | 1.16469200  | -0.60628300 | -0.30572700 |
| C  | 1.44225800  | 2.04954200  | 1.53096700  |
| C  | 0.73669000  | 2.92859000  | 0.67858700  |
| C  | 0.91489800  | 1.57287800  | 2.75233000  |
| C  | -0.55695300 | 3.31311600  | 1.07595600  |
| C  | -0.38033000 | 1.99403700  | 3.10424400  |
| C  | -1.11605900 | 2.84258200  | 2.26937700  |
| H  | -1.14599100 | 3.96740900  | 0.42763100  |
| H  | -0.82580300 | 1.62844000  | 4.03516400  |
| H  | -2.14084800 | 3.12168800  | 2.52948100  |
| C  | 4.73503000  | -0.90388000 | -0.54035600 |
| C  | 5.00399100  | -0.74075900 | -1.91755600 |
| C  | 4.98942100  | -2.10275500 | 0.16207200  |
| C  | 5.56569800  | -1.83686500 | -2.59734600 |
| C  | 5.55132900  | -3.16756200 | -0.56538200 |
| C  | 5.83999400  | -3.03574400 | -1.92866000 |
| H  | 5.78369700  | -1.74977500 | -3.66659300 |
| H  | 5.75723700  | -4.11390400 | -0.05502700 |
| H  | 6.27642800  | -3.87736500 | -2.47649100 |
| C  | 1.67531500  | 0.60311400  | 3.64808400  |
| H  | 2.67194000  | 0.43205200  | 3.20525100  |
| C  | 1.88945600  | 1.18907900  | 5.05523400  |
| H  | 2.48124400  | 0.49210200  | 5.67474100  |
| H  | 2.42805800  | 2.15191300  | 5.01289300  |
| H  | 0.92838500  | 1.36176400  | 5.57129500  |
| C  | 0.95833800  | -0.75823200 | 3.71293900  |
| H  | -0.04518200 | -0.65932900 | 4.16362300  |
| H  | 0.83468600  | -1.18879800 | 2.70348700  |
| H  | 1.53738800  | -1.47038300 | 4.32775300  |
| C  | 4.63221900  | -2.27405100 | 1.63313300  |

|                     |              |             |             |    |             |             |             |
|---------------------|--------------|-------------|-------------|----|-------------|-------------|-------------|
| C                   | 5.83498900   | -2.74325300 | 2.46972700  | C  | 1.75830400  | -0.46881300 | 0.86335500  |
| H                   | 6.68472100   | -2.04414700 | 2.38121300  | C  | 3.30829300  | -0.91504600 | 2.47635600  |
| H                   | 5.55425200   | -2.80704000 | 3.53571000  | C  | 2.12634000  | -1.47299300 | 2.87756200  |
| H                   | 6.18461700   | -3.74291800 | 2.15725400  | H  | 4.29292300  | -0.90112900 | 2.93567000  |
| C                   | 4.66146700   | 0.54359300  | -2.66158500 | H  | 1.86358800  | -2.04749100 | 3.76147400  |
| H                   | 4.35682400   | 1.29976100  | -1.91762700 | N  | 1.19206100  | -1.18862800 | 1.88363100  |
| C                   | 1.30563500   | 3.42434500  | -0.64451900 | N  | 3.06297300  | -0.30663200 | 1.24767300  |
| C                   | 1.41403300   | 4.95999600  | -0.66022900 | Au | 0.87206100  | 0.24422300  | -0.79494100 |
| H                   | 0.42043500   | 5.43408500  | -0.57310500 | C  | 4.07786100  | 0.29884800  | 0.41839600  |
| H                   | 2.03819600   | 5.32865300  | 0.17256400  | C  | 4.78196700  | -0.53722400 | -0.47743800 |
| H                   | 1.86748900   | 5.30314400  | -1.60688600 | C  | 4.32153400  | 1.68622600  | 0.53693900  |
| C                   | 3.46109300   | 0.31293300  | -3.60005300 | C  | 5.78108500  | 0.05930600  | -1.26783700 |
| H                   | 2.58829400   | -0.06924500 | -3.04109100 | C  | 5.33685300  | 2.22852200  | -0.27115300 |
| H                   | 3.16813600   | 1.25794900  | -4.09142900 | C  | 6.06006100  | 1.42598700  | -1.16199400 |
| H                   | 3.70742800   | -0.41994300 | -4.38915200 | H  | 6.34009800  | -0.55795300 | -1.97835100 |
| C                   | 5.86975800   | 1.11089000  | -3.42664400 | H  | 5.55887500  | 3.29777900  | -0.20741300 |
| H                   | 5.60046900   | 2.06843500  | -3.90596000 | H  | 6.84219800  | 1.87315900  | -1.78436800 |
| H                   | 6.72477400   | 1.29416400  | -2.75274000 | C  | -0.17068400 | -1.66715300 | 1.89116400  |
| H                   | 6.20805300   | 0.42502000  | -4.22321800 | C  | -0.47384100 | -2.83283600 | 1.15055200  |
| C                   | 3.43702500   | -3.23539000 | 1.78219800  | C  | -1.13350600 | -0.96667500 | 2.65516100  |
| H                   | 2.56339000   | -2.87231100 | 1.21169400  | C  | -1.79944700 | -3.30158100 | 1.19891600  |
| H                   | 3.69098700   | -4.24484600 | 1.41211300  | C  | -2.43872800 | -1.49024400 | 2.68010900  |
| H                   | 3.14379700   | -3.32549100 | 2.84316800  | C  | -2.77033200 | -2.64412000 | 1.96033200  |
| H                   | 4.31745600   | -1.29189600 | 2.02668100  | H  | -2.06948700 | -4.19690000 | 0.63002400  |
| C                   | 0.46956900   | 2.91048900  | -1.83204300 | H  | -3.20838600 | -0.97826500 | 3.26526300  |
| H                   | 0.89999100   | 3.26283000  | -2.78666600 | H  | -3.79596600 | -3.02568400 | 1.98326100  |
| H                   | 0.45582600   | 1.80603800  | -1.84871300 | C  | 3.54697600  | 2.55575600  | 1.51838900  |
| H                   | -0.57511100  | 3.26478800  | -1.77787400 | H  | 2.59744000  | 2.04284800  | 1.74814100  |
| H                   | 2.32550300   | 3.01616700  | -0.75559400 | C  | 4.33345700  | 2.70040000  | 2.83666800  |
| C                   | -4.80598300  | -2.33071200 | -0.56807300 | H  | 3.75837400  | 3.30177400  | 3.56295400  |
| C                   | -5.86609700  | -1.40261000 | -0.68247600 | H  | 4.54165600  | 1.71841700  | 3.29644900  |
| C                   | -5.09185000  | -3.68262300 | -0.25872200 | H  | 5.30123100  | 3.20546800  | 2.66519800  |
| C                   | -7.18405100  | -1.80801300 | -0.46731700 | C  | 3.18605200  | 3.93317200  | 0.94062600  |
| H                   | -5.66435400  | -0.36128800 | -0.97207800 | H  | 4.08343400  | 4.54321600  | 0.73601400  |
| C                   | -6.40209600  | -4.08922600 | -0.04577700 | H  | 2.60710600  | 3.83865500  | 0.00669700  |
| H                   | -4.27390300  | -4.40303300 | -0.17359500 | H  | 2.56713000  | 4.48831200  | 1.66361100  |
| C                   | -7.45988200  | -3.15376700 | -0.14043000 | C  | -0.78511400 | 0.28591900  | 3.44939300  |
| H                   | -7.98916700  | -1.07712200 | -0.56860300 | C  | -0.54585000 | -0.06675400 | 4.93130500  |
| H                   | -6.64076400  | -5.12669000 | 0.20450200  | H  | 0.25733800  | -0.81414900 | 5.05265300  |
| O                   | -8.69946600  | -3.65160300 | 0.09358700  | H  | -0.26089200 | 0.83572500  | 5.50079000  |
| C                   | -9.80947200  | -2.74400100 | 0.03948800  | H  | -1.46311400 | -0.48118000 | 5.38755100  |
| H                   | -9.92721900  | -2.31303200 | -0.97087500 | C  | 0.56204400  | -3.57934100 | 0.31851200  |
| H                   | -10.69456300 | -3.34853700 | 0.28418500  | H  | 1.53734400  | -3.07869200 | 0.44556400  |
| H                   | -9.70060700  | -1.93223900 | 0.78079900  | C  | 4.46598500  | -2.02011900 | -0.62680300 |
| O                   | -2.54273700  | -2.84553000 | -1.09029100 | C  | 5.70858700  | -2.89785400 | -0.39625800 |
| C                   | -1.72031200  | -0.18496400 | -1.03991000 | H  | 6.48940900  | -2.70805300 | -1.15379200 |
| C                   | -0.68440100  | -1.27587200 | -0.83161900 | H  | 6.15133500  | -2.71501600 | 0.59860100  |
| C                   | -1.15172100  | -2.53198300 | -0.89368900 | H  | 5.43685200  | -3.96648200 | -0.45798300 |
| H                   | -0.60479200  | -3.47060500 | -0.79686300 | C  | 0.20358300  | -3.52094900 | -1.17781800 |
| H                   | -3.66511000  | 0.10166000  | -0.15645300 | H  | 0.15084000  | -2.47334600 | -1.52417000 |
| H                   | -1.75331900  | 0.13751900  | -2.10016700 | H  | 0.96622900  | -4.04653800 | -1.77930500 |
| H                   | -1.51380300  | 0.71280900  | -0.43858200 | H  | -0.77335700 | -3.99689400 | -1.37601900 |
| O                   | -5.13566700  | 1.82195700  | -1.44029700 | C  | 0.72491600  | -5.03372900 | 0.79724400  |
| O                   | -4.00006900  | 1.51112400  | 0.52369600  | H  | 1.51629500  | -5.54029700 | 0.21677400  |
| C                   | -4.50281000  | 2.19556400  | -0.42782300 | H  | 1.00233600  | -5.07864300 | 1.86494600  |
| C                   | -4.21660000  | 3.72653900  | -0.34051200 | H  | -0.20800800 | -5.60958000 | 0.66455300  |
| F                   | -5.25688800  | 4.47748700  | -0.78560100 | C  | -1.85383400 | 1.38443400  | 3.31977500  |
| F                   | -3.91950700  | 4.15878300  | 0.91781400  | H  | -2.06301300 | 1.62746000  | 2.26526000  |
| F                   | -3.13404000  | 4.04238800  | -1.12921500 | H  | -2.80190400 | 1.09084400  | 3.80473300  |
|                     |              |             |             | H  | -1.50317400 | 2.30522900  | 3.81552300  |
|                     |              |             |             | H  | 0.15540600  | 0.69525500  | 3.04117000  |
|                     |              |             |             | C  | 3.82445000  | -2.29830600 | -1.99911000 |
|                     |              |             |             | H  | 3.55446600  | -3.36570400 | -2.08829700 |
| <b>TS2_5exo_TFA</b> |              |             |             |    |             |             |             |
| N                   | -3.28989500  | -0.15941800 | -3.95649000 |    |             |             |             |
| C                   | -3.36400700  | -0.23444000 | -2.67092200 |    |             |             |             |

|   |             |             |             |
|---|-------------|-------------|-------------|
| H | 2.90904000  | -1.69516100 | -2.13298700 |
| H | 4.51848600  | -2.05358500 | -2.82296800 |
| H | 3.72341900  | -2.29488800 | 0.14199300  |
| C | -4.48897200 | -0.63993800 | -1.83773200 |
| C | -5.64427200 | -1.18551900 | -2.43249900 |
| C | -4.44550900 | -0.47658500 | -0.43358100 |
| C | -6.73843900 | -1.56845900 | -1.65404800 |
| H | -5.67602200 | -1.30933000 | -3.51903600 |
| C | -5.53471600 | -0.85022300 | 0.34790100  |
| H | -3.56131200 | -0.03731700 | 0.03471400  |
| C | -6.68791500 | -1.40129900 | -0.25269700 |
| H | -7.62099800 | -1.99322500 | -2.13713300 |
| H | -5.52002700 | -0.71797300 | 1.43354900  |
| O | -7.69341200 | -1.73744400 | 0.60099200  |
| C | -8.89609000 | -2.27018400 | 0.03412100  |
| H | -8.70696500 | -3.22297700 | -0.49377700 |
| H | -9.56833400 | -2.45278300 | 0.88502100  |
| H | -9.36823100 | -1.55023300 | -0.65898900 |
| O | -2.20574700 | 0.12879100  | -1.96534300 |
| C | -1.93802000 | 0.32397300  | -4.24621600 |
| C | -1.27702600 | 0.51560800  | -2.89647800 |
| C | -0.05351200 | 1.00595800  | -2.51557900 |
| H | 0.57749900  | 1.26911000  | -3.37991600 |
| H | -0.22712200 | 2.14293400  | -1.78299000 |
| H | -1.38421700 | -0.40180700 | -4.87207600 |
| H | -1.97247400 | 1.27055300  | -4.81830400 |
| O | -0.19055400 | 3.25599300  | -1.11372500 |
| O | -2.07109500 | 2.51032600  | -0.03100300 |
| C | -1.04602500 | 3.19334000  | -0.13905100 |
| C | -0.61576900 | 4.06724700  | 1.07309700  |
| F | -1.67504100 | 4.44285400  | 1.82980000  |
| F | 0.21707600  | 3.33225000  | 1.88095000  |
| F | 0.05795900  | 5.19086600  | 0.71910600  |

### TS2\_gendo\_TFA

|    |             |             |             |
|----|-------------|-------------|-------------|
| N  | 2.39462500  | -2.60942800 | 0.54980700  |
| C  | 3.07682500  | -2.32371300 | -0.49683900 |
| C  | -0.94838200 | 1.50732300  | 0.30436800  |
| C  | -0.65627600 | 3.61967100  | 1.10574000  |
| C  | -2.00216700 | 3.41677400  | 0.95430100  |
| H  | -0.09125200 | 4.47978500  | 1.45532000  |
| H  | -2.85420200 | 4.06589400  | 1.13702400  |
| N  | -2.15839700 | 2.12050800  | 0.46869100  |
| N  | -0.03182000 | 2.44241900  | 0.70577100  |
| Au | -0.46775600 | -0.33395500 | -0.34017200 |
| C  | 1.38975200  | 2.18583000  | 0.68959400  |
| C  | 1.97515700  | 1.57822300  | 1.82331900  |
| C  | 2.11019000  | 2.48050000  | -0.48932400 |
| C  | 3.34271100  | 1.25820300  | 1.74543400  |
| C  | 3.47499600  | 2.14067700  | -0.51182900 |
| C  | 4.08475000  | 1.53297500  | 0.59132300  |
| H  | 3.82745000  | 0.76473400  | 2.59359400  |
| H  | 4.06190300  | 2.33625100  | -1.41518800 |
| H  | 5.14175000  | 1.25247000  | 0.54420300  |
| C  | -3.41975900 | 1.49351500  | 0.15487100  |
| C  | -4.10749100 | 0.81397300  | 1.18689000  |
| C  | -3.89290500 | 1.57216700  | -1.17319600 |
| C  | -5.34091900 | 0.22692000  | 0.85413000  |
| C  | -5.12772000 | 0.95864800  | -1.45255400 |
| C  | -5.84642000 | 0.30004500  | -0.44957200 |
| H  | -5.90256300 | -0.31395900 | 1.62053600  |
| H  | -5.52124900 | 0.98689900  | -2.47376100 |
| H  | -6.80133300 | -0.17886600 | -0.68895300 |

|   |             |             |             |
|---|-------------|-------------|-------------|
| C | 1.44660900  | 3.08898100  | -1.71865400 |
| H | 0.41105300  | 3.36291300  | -1.45120600 |
| C | 2.15920600  | 4.37292700  | -2.17916000 |
| H | 1.62876400  | 4.81547400  | -3.04073200 |
| H | 2.19230100  | 5.12777600  | -1.37426000 |
| H | 3.19736500  | 4.16992300  | -2.49582900 |
| C | 1.37022400  | 2.05405200  | -2.85745600 |
| H | 2.37958100  | 1.72883600  | -3.16736700 |
| H | 0.80915700  | 1.15837700  | -2.53647600 |
| H | 0.86383100  | 2.48551900  | -3.73936200 |
| C | -3.08942500 | 2.23666700  | -2.28352100 |
| C | -3.90715100 | 3.29710300  | -3.04095600 |
| H | -4.29489400 | 4.07316400  | -2.35795900 |
| H | -3.27475700 | 3.79247200  | -3.79862300 |
| H | -4.76751400 | 2.84933700  | -3.56885600 |
| C | -3.54688100 | 0.72817600  | 2.60157900  |
| H | -2.45500600 | 0.88489200  | 2.53788600  |
| C | 1.16659100  | 1.22308200  | 3.06449500  |
| C | 1.81705800  | 1.76337800  | 4.34990700  |
| H | 2.79253600  | 1.28522500  | 4.54722900  |
| H | 1.97993000  | 2.85401800  | 4.29340600  |
| H | 1.16729200  | 1.55780000  | 5.21864000  |
| C | -3.77140600 | -0.64826200 | 3.24985100  |
| H | -3.41696600 | -1.46697200 | 2.60173900  |
| H | -3.22049400 | -0.70026700 | 4.20555500  |
| H | -4.83750100 | -0.82511700 | 3.47891800  |
| C | -4.13047700 | 1.85034400  | 3.48324800  |
| H | -3.69982300 | 1.80627700  | 4.49955300  |
| H | -3.91911500 | 2.85044000  | 3.06670400  |
| H | -5.22690800 | 1.74619200  | 3.57277500  |
| C | -2.52987600 | 1.17041000  | -3.24507900 |
| H | -1.91226500 | 0.43441300  | -2.69810100 |
| H | -3.34600300 | 0.62156200  | -3.74808000 |
| H | -1.90366600 | 1.64214100  | -4.02339100 |
| H | -2.22773900 | 2.75150700  | -1.82366000 |
| C | 0.94550700  | -0.30022700 | 3.14386300  |
| H | 0.34511100  | -0.55759800 | 4.03490000  |
| H | 0.41040600  | -0.66393700 | 2.24822900  |
| H | 1.90541600  | -0.84278500 | 3.20120900  |
| H | 0.17302200  | 1.69746100  | 2.97510300  |
| C | 4.48034700  | -1.88226500 | -0.46474700 |
| C | 5.20214900  | -1.95950400 | 0.74294100  |
| C | 5.11189200  | -1.31847600 | -1.59577500 |
| C | 6.51439500  | -1.48805800 | 0.83561600  |
| H | 4.71147300  | -2.39129800 | 1.61984100  |
| C | 6.41950200  | -0.84330700 | -1.51600300 |
| H | 4.56442300  | -1.24294600 | -2.53845000 |
| C | 7.13267000  | -0.92132700 | -0.30006800 |
| H | 7.04805800  | -1.56627000 | 1.78561700  |
| H | 6.91348600  | -0.40029700 | -2.38587600 |
| O | 8.40259000  | -0.42787600 | -0.32658300 |
| C | 9.15961500  | -0.47586700 | 0.88764900  |
| H | 9.31572200  | -1.51645600 | 1.22683300  |
| H | 10.13205600 | -0.02108300 | 0.64877500  |
| H | 8.67183600  | 0.10512500  | 1.69222600  |
| O | 2.54690700  | -2.32548900 | -1.80585500 |
| C | 1.00452200  | -3.02949600 | 0.31361000  |
| C | 0.35244300  | -2.22483400 | -0.80816500 |
| C | 1.20225000  | -2.00256000 | -1.85281800 |
| H | 0.96050700  | -1.52009700 | -2.80602600 |
| H | -1.03500700 | -2.66533600 | -1.06871700 |
| H | 1.00524100  | -4.10640500 | 0.03889700  |
| H | 0.43985400  | -2.94682700 | 1.25439800  |



|   |             |             |             |
|---|-------------|-------------|-------------|
| O | -2.12296400 | -3.08238700 | -1.25365800 |
| O | -2.33481200 | -2.97280000 | 1.02638600  |
| C | -2.77424200 | -3.08378400 | -0.12051100 |
| C | -4.29790900 | -3.28901700 | -0.34254400 |
| F | -5.00651600 | -2.95280100 | 0.76160800  |
| F | -4.55908300 | -4.59858500 | -0.61711100 |
| F | -4.76714200 | -2.55213000 | -1.38170400 |

### HSbF<sub>6</sub>

|    |             |            |             |
|----|-------------|------------|-------------|
| H  | -0.03508800 | 0.92825300 | -0.67430500 |
| Sb | -1.39833200 | 2.35396400 | -2.61526500 |
| F  | -1.25338700 | 4.11545100 | -1.94917900 |
| F  | 0.27959600  | 2.55628200 | -3.46300600 |
| F  | -2.46561700 | 2.70932300 | -4.12180100 |
| F  | -2.81614000 | 2.04222700 | -1.40158200 |
| F  | -1.24232200 | 0.47542600 | -2.83031000 |
| F  | -0.09497100 | 1.88735500 | -0.79017000 |

### IPrAuSbF<sub>6</sub>

|    |             |             |             |
|----|-------------|-------------|-------------|
| C  | -0.81852800 | -1.44107800 | 1.20612200  |
| C  | -0.61841300 | -3.47192300 | 2.19206300  |
| C  | -1.86169400 | -2.98529100 | 2.49581600  |
| H  | -0.11911300 | -4.40008400 | 2.45715900  |
| H  | -2.67610500 | -3.39826200 | 3.08491800  |
| N  | -1.96599300 | -1.74073700 | 1.88200600  |
| N  | 0.00504400  | -2.51179700 | 1.40039400  |
| Au | -0.46297300 | 0.15797900  | 0.15906400  |
| C  | 1.31166200  | -2.63450400 | 0.79857400  |
| C  | 1.40261200  | -3.24979900 | -0.47040500 |
| C  | 2.42293900  | -2.10123200 | 1.48763300  |
| C  | 2.68185100  | -3.33342600 | -1.04932800 |
| C  | 3.67763100  | -2.21123000 | 0.86142600  |
| C  | 3.80631700  | -2.82114100 | -0.39193200 |
| H  | 2.79260400  | -3.79670400 | -2.03479800 |
| H  | 4.56290400  | -1.80479300 | 1.36080800  |
| H  | 4.79149200  | -2.89170000 | -0.86424600 |
| C  | -3.12338800 | -0.87738500 | 1.92098000  |
| C  | -4.10640600 | -1.02958300 | 0.91757600  |
| C  | -3.20370100 | 0.08678100  | 2.95049200  |
| C  | -5.21590400 | -0.16687000 | 0.97521600  |
| C  | -4.33440600 | 0.92321100  | 2.95843900  |
| C  | -5.33101100 | 0.79612900  | 1.98379500  |
| H  | -5.99618800 | -0.24918900 | 0.21193200  |
| H  | -4.42712700 | 1.69064600  | 3.73359100  |
| H  | -6.20061500 | 1.46094600  | 2.00424000  |
| C  | 2.28610700  | -1.39697500 | 2.83144500  |
| H  | 1.24121800  | -1.50499400 | 3.17127600  |
| C  | 3.18686800  | -2.03140200 | 3.90562900  |
| H  | 3.03082400  | -1.53025900 | 4.87705000  |
| H  | 2.96612200  | -3.10530700 | 4.03512300  |
| H  | 4.25624200  | -1.93389100 | 3.64858100  |
| C  | 2.57079100  | 0.10966000  | 2.68202000  |
| H  | 3.61076800  | 0.28959600  | 2.35667000  |
| H  | 1.89789500  | 0.56859100  | 1.93492500  |
| H  | 2.42068900  | 0.62805200  | 3.64570100  |
| C  | -2.09676600 | 0.27033200  | 3.98002900  |
| C  | -2.62590100 | 0.17891000  | 5.42201100  |
| H  | -3.14073900 | -0.78075800 | 5.60287900  |
| H  | -1.79088100 | 0.25947400  | 6.13996800  |
| H  | -3.33782100 | 0.99238400  | 5.64673400  |
| C  | -4.00129500 | -2.07004700 | -0.19095700 |

|    |             |             |             |
|----|-------------|-------------|-------------|
| H  | -3.03562300 | -2.59430900 | -0.08593800 |
| C  | 0.18284800  | -3.77773200 | -1.21515100 |
| C  | 0.32496000  | -5.27700500 | -1.53494000 |
| H  | 1.17293800  | -5.46693100 | -2.21643300 |
| H  | 0.48673500  | -5.87227500 | -0.61943700 |
| H  | -0.58940800 | -5.64905700 | -2.02958000 |
| C  | -4.02132600 | -1.42043800 | -1.58692400 |
| H  | -3.19621300 | -0.70188200 | -1.71898700 |
| H  | -3.92435600 | -2.19816300 | -2.36523600 |
| H  | -4.96863300 | -0.88298600 | -1.76853400 |
| C  | -5.11733000 | -3.12286300 | -0.05202500 |
| H  | -5.01724900 | -3.89564500 | -0.83453400 |
| H  | -5.08134300 | -3.62371100 | 0.93129800  |
| H  | -6.11514400 | -2.66198000 | -0.15993900 |
| C  | -1.36106600 | 1.60164300  | 3.73442000  |
| H  | -0.97041600 | 1.65147800  | 2.70183000  |
| H  | -2.03672800 | 2.46275800  | 3.88111900  |
| H  | -0.51186400 | 1.71056900  | 4.43235900  |
| H  | -1.36198300 | -0.54282700 | 3.84582800  |
| C  | -0.08137900 | -2.95922100 | -2.49325500 |
| H  | -0.98556700 | -3.33447600 | -3.00447000 |
| H  | -0.23856100 | -1.89005000 | -2.26951100 |
| H  | 0.76344800  | -3.03642100 | -3.20052500 |
| H  | -0.69931800 | -3.66327100 | -0.56166800 |
| Sb | -1.29879400 | 2.32318100  | -2.55816400 |
| F  | -1.25565200 | 4.13056200  | -1.96937500 |
| F  | 0.26745700  | 2.61035000  | -3.59713200 |
| F  | -2.45281800 | 2.71075300  | -4.01621200 |
| F  | -2.76038600 | 1.97587700  | -1.37783400 |
| F  | -1.24034400 | 0.46119400  | -2.99752800 |
| F  | -0.06372300 | 1.90646200  | -1.01142400 |

### Int1\_SbF<sub>6</sub>

|    |             |             |             |
|----|-------------|-------------|-------------|
| N  | 1.60127800  | 1.12129200  | -2.50222500 |
| C  | 2.57133000  | 0.20775000  | -2.84106800 |
| C  | -0.96528000 | -1.46934500 | 1.08928800  |
| C  | -0.46192200 | -3.25292600 | 2.39899900  |
| C  | -1.71064500 | -2.82260500 | 2.75566500  |
| H  | 0.15096900  | -4.07308600 | 2.76319800  |
| H  | -2.41792600 | -3.18740000 | 3.49535200  |
| N  | -1.99926200 | -1.73336000 | 1.94107300  |
| N  | -0.01917100 | -2.40861600 | 1.38270600  |
| Au | -1.02868400 | -0.01905100 | -0.31867900 |
| C  | 1.27008800  | -2.51419500 | 0.73947800  |
| C  | 1.33659600  | -3.09497900 | -0.54762000 |
| C  | 2.40635000  | -2.05269000 | 1.44448500  |
| C  | 2.60628800  | -3.17769000 | -1.14790700 |
| C  | 3.65163700  | -2.18914700 | 0.80672600  |
| C  | 3.75116200  | -2.73535900 | -0.47766600 |
| H  | 2.69506700  | -3.59547800 | -2.15507100 |
| H  | 4.55494200  | -1.84330500 | 1.31738600  |
| H  | 4.72850800  | -2.80290500 | -0.96449200 |
| C  | -3.21744300 | -0.95968000 | 1.96606300  |
| C  | -4.28995500 | -1.37540000 | 1.14653600  |
| C  | -3.25837900 | 0.19239400  | 2.78622000  |
| C  | -5.45909300 | -0.59264600 | 1.17651900  |
| C  | -4.45340600 | 0.93399600  | 2.77947000  |
| C  | -5.54109400 | 0.54507500  | 1.98698500  |
| H  | -6.31090800 | -0.87738100 | 0.55051200  |
| H  | -4.53036800 | 1.83335100  | 3.39724700  |
| H  | -6.45949900 | 1.14108000  | 1.99641100  |
| C  | 2.31986900  | -1.47156500 | 2.85131500  |
| H  | 1.25855600  | -1.26621900 | 3.07660900  |

|    |             |             |              |
|----|-------------|-------------|--------------|
| C  | 2.82628500  | -2.49906300 | 3.88278500   |
| H  | 2.73686500  | -2.09420300 | 4.90643600   |
| H  | 2.25286100  | -3.44130100 | 3.83620600   |
| H  | 3.88892100  | -2.74327400 | 3.70499900   |
| C  | 3.07542400  | -0.13836600 | 2.98695900   |
| H  | 4.15897900  | -0.25812700 | 2.81083800   |
| H  | 2.68578400  | 0.61004500  | 2.28017700   |
| H  | 2.94842000  | 0.25971600  | 4.00930400   |
| C  | -2.07717900 | 0.59700000  | 3.66045400   |
| C  | -2.23898800 | 0.00617900  | 5.07569900   |
| H  | -2.31455600 | -1.09505900 | 5.05275700   |
| H  | -1.37198100 | 0.27550900  | 5.70449000   |
| H  | -3.14977000 | 0.39917200  | 5.56223300   |
| C  | -4.19180800 | -2.58685300 | 0.22691700   |
| H  | -3.22935500 | -3.09121000 | 0.42163500   |
| C  | 0.11284100  | -3.64206700 | -1.27322100  |
| C  | 0.28455400  | -5.13737200 | -1.59989700  |
| H  | 1.12057100  | -5.30532500 | -2.30120100  |
| H  | 0.48264300  | -5.72906300 | -0.68930700  |
| H  | -0.63219800 | -5.53182900 | -2.07272700  |
| C  | -4.18946600 | -2.14853100 | -1.25042100  |
| H  | -3.35763700 | -1.45065400 | -1.45582100  |
| H  | -4.07375600 | -3.02526100 | -1.91222700  |
| H  | -5.13312600 | -1.64148200 | -1.51959300  |
| C  | -5.30987600 | -3.60779100 | 0.50278500   |
| H  | -5.17689500 | -4.49876700 | -0.13556100  |
| H  | -5.30404200 | -3.93798900 | 1.55609100   |
| H  | -6.30718700 | -3.18657600 | 0.28534000   |
| C  | -1.86438400 | 2.11776400  | 3.72026000   |
| H  | -1.80226600 | 2.56208500  | 2.71412000   |
| H  | -2.67108600 | 2.62603100  | 4.27807800   |
| H  | -0.91496600 | 2.34125500  | 4.23495400   |
| H  | -1.16353200 | 0.16078500  | 3.21938800   |
| C  | -0.19524500 | -2.82848800 | -2.54250800  |
| H  | -1.08483900 | -3.23668800 | -3.05469000  |
| H  | -0.40034800 | -1.77366900 | -2.28464300  |
| H  | 0.65093900  | -2.83815700 | -3.25018100  |
| H  | -0.75855800 | -3.55260600 | -0.60101400  |
| C  | 3.86314100  | 0.34207100  | -2.10586900  |
| C  | 3.96514100  | 0.96408700  | -0.84915600  |
| C  | 5.02282500  | -0.22307400 | -2.67840600  |
| C  | 5.19020100  | 1.04938700  | -0.17857400  |
| H  | 3.07383100  | 1.33429900  | -0.33944800  |
| C  | 6.24939400  | -0.14781100 | -2.02370000  |
| H  | 4.93910100  | -0.72548500 | -3.64671500  |
| C  | 6.34357900  | 0.49383200  | -0.76694400  |
| H  | 5.22538700  | 1.54354300  | 0.79461800   |
| H  | 7.15579700  | -0.57593500 | -2.46262800  |
| O  | 7.58461800  | 0.51232900  | -0.20388400  |
| C  | 7.71365900  | 1.12900800  | 1.08177600   |
| H  | 7.09077200  | 0.61761400  | 1.83926700   |
| H  | 8.77461100  | 1.02976200  | 1.35384700   |
| H  | 7.44248200  | 2.19991600  | 1.04730100   |
| O  | 2.38287800  | -0.66426800 | -3.711107400 |
| C  | 0.29238900  | 1.08460200  | -3.11762100  |
| C  | -0.78372200 | 1.28641900  | -2.13263400  |
| C  | -1.73047200 | 1.69580800  | -1.42960200  |
| H  | -2.54284600 | 2.28018100  | -1.01830900  |
| H  | 1.80420800  | 1.92294400  | -1.89907700  |
| H  | 0.17402900  | 1.87553800  | -3.88668000  |
| H  | 0.19956700  | 0.11072700  | -3.62918600  |
| Sb | 1.16547600  | 3.62947000  | 0.92134000   |
| F  | 1.07758100  | 3.62314100  | 2.83064400   |

|   |             |            |             |
|---|-------------|------------|-------------|
| F | 3.07820100  | 3.64461400 | 0.98617900  |
| F | 1.11378200  | 5.53549100 | 0.88074100  |
| F | -0.75248700 | 3.56026100 | 0.81302100  |
| F | 1.24870500  | 3.58800000 | -1.01060400 |
| F | 1.21561300  | 1.69906200 | 0.91625100  |

### TS1\_5exo\_SbF6

|    |             |             |             |
|----|-------------|-------------|-------------|
| N  | 2.99269100  | -0.95743800 | 0.60186200  |
| C  | 3.44308700  | -2.23128400 | 0.41642100  |
| C  | -3.05056900 | 0.51555700  | 0.07783500  |
| C  | -4.29554400 | 2.41458700  | 0.07219200  |
| C  | -5.08213600 | 1.40526300  | -0.41349700 |
| H  | -4.49652000 | 3.46932600  | 0.24119500  |
| H  | -6.11086700 | 1.39357800  | -0.76336000 |
| N  | -4.30131100 | 0.25256800  | -0.40125700 |
| N  | -3.05647400 | 1.85048700  | 0.36456700  |
| Au | -1.54749200 | -0.81123100 | 0.30231800  |
| C  | -1.91923700 | 2.54677000  | 0.91899000  |
| C  | -1.67525800 | 2.42614300  | 2.30470600  |
| C  | -1.08901000 | 3.28055700  | 0.03838900  |
| C  | -0.52808100 | 3.06710200  | 2.80982200  |
| C  | 0.04406500  | 3.89383000  | 0.59793200  |
| C  | 0.32504800  | 3.78379800  | 1.96595400  |
| H  | -0.30242700 | 2.99563000  | 3.87878600  |
| H  | 0.73423700  | 4.44345300  | -0.04506000 |
| H  | 1.22830400  | 4.25170100  | 2.36662200  |
| C  | -4.73924500 | -1.06382200 | -0.79892300 |
| C  | -5.39531700 | -1.86496100 | 0.16300800  |
| C  | -4.46249700 | -1.49617000 | -2.11485800 |
| C  | -5.78221400 | -3.15714800 | -0.23578300 |
| C  | -4.87280400 | -2.79731200 | -2.45971000 |
| C  | -5.52483500 | -3.61805800 | -1.53244500 |
| H  | -6.28327000 | -3.81271800 | 0.48335000  |
| H  | -4.67223700 | -3.17059200 | -3.46892700 |
| H  | -5.83181600 | -4.62847300 | -1.82151500 |
| C  | -1.37500300 | 3.34560900  | -1.45901000 |
| H  | -2.47034900 | 3.28354100  | -1.59646800 |
| C  | -0.89650800 | 4.65393300  | -2.10846200 |
| H  | -1.25615700 | 4.70377500  | -3.15083400 |
| H  | -1.27275700 | 5.54337100  | -1.57377200 |
| H  | 0.20490800  | 4.70643800  | -2.14030300 |
| C  | -0.74387700 | 2.13766200  | -2.18420500 |
| H  | 0.35396100  | 2.17756300  | -2.10578300 |
| H  | -1.07417700 | 1.17947300  | -1.74666900 |
| H  | -1.01903900 | 2.14641700  | -3.25410500 |
| C  | -3.72816400 | -0.62438900 | -3.12484300 |
| C  | -4.56266300 | -0.40894700 | -4.40034800 |
| H  | -5.54862300 | 0.03009600  | -4.16853200 |
| H  | -4.03525400 | 0.27565800  | -5.08736800 |
| H  | -4.73191600 | -1.35799900 | -4.93926800 |
| C  | -5.63104100 | -1.38903800 | 1.59132700  |
| H  | -5.39303200 | -0.31199700 | 1.64070400  |
| C  | -2.59448600 | 1.65204100  | 3.24309500  |
| C  | -3.25159000 | 2.59409500  | 4.26881800  |
| H  | -2.49567300 | 3.07366000  | 4.91549300  |
| H  | -3.82467200 | 3.39421300  | 3.76877000  |
| H  | -3.94393900 | 2.03131100  | 4.91980500  |
| C  | -4.68103300 | -2.11650200 | 2.56301400  |
| H  | -3.62523700 | -1.97636400 | 2.27002700  |

|    |             |             |             |   |             |             |             |
|----|-------------|-------------|-------------|---|-------------|-------------|-------------|
| H  | -4.80977200 | -1.72998700 | 3.58960900  | C | -0.14183000 | -4.51061500 | -0.12313200 |
| H  | -4.88611100 | -3.20173600 | 2.57938900  | H | -1.03271700 | -4.71783700 | -2.08310900 |
| C  | -7.09906700 | -1.55240400 | 2.02164600  | H | 0.54107600  | -4.13642100 | 1.88496100  |
| H  | -7.24502300 | -1.14133200 | 3.03588900  | H | 0.74203600  | -5.10360400 | -0.37238700 |
| H  | -7.78163500 | -1.02172000 | 1.33541300  | C | -4.78567100 | 1.28253500  | 0.68650500  |
| H  | -7.40243700 | -2.61360700 | 2.04747700  | C | -5.50439800 | 1.65317900  | -0.47236500 |
| C  | -2.34762800 | -1.22138900 | -3.45772900 | C | -4.33282300 | 2.21004100  | 1.65092700  |
| H  | -1.73779300 | -1.34781400 | -2.54453600 | C | -5.77623900 | 3.02203000  | -0.64734000 |
| H  | -2.44574800 | -2.21026600 | -3.93990300 | C | -4.63444500 | 3.56611000  | 1.42686400  |
| H  | -1.79652300 | -0.55897600 | -4.14787700 | C | -5.34802500 | 3.96795200  | 0.29180600  |
| H  | -3.56103400 | 0.36621300  | -2.66764800 | H | -6.32381200 | 3.34945200  | -1.53674600 |
| C  | -1.84248700 | 0.50455500  | 3.94123300  | H | -4.30077800 | 4.31419300  | 2.15329600  |
| H  | -2.52941600 | -0.07235700 | 4.58508200  | H | -5.56957000 | 5.02871300  | 0.13518700  |
| H  | -1.40395300 | -0.18792300 | 3.20007600  | C | -1.46750400 | -2.53755500 | 2.89665300  |
| H  | -1.02409200 | 0.88509600  | 4.57765600  | H | -2.51558200 | -2.22051700 | 3.04515900  |
| H  | -3.40357100 | 1.19807300  | 2.64499200  | C | -1.12956600 | -3.53766000 | 4.01532000  |
| C  | 4.76106400  | -2.42802100 | -0.24096000 | H | -1.31854200 | -3.07833200 | 5.00138300  |
| C  | 5.42079400  | -1.42309500 | -0.97604700 | H | -1.74021700 | -4.45418500 | 3.94053200  |
| C  | 5.36027200  | -3.70413600 | -0.14445500 | H | -0.06675400 | -3.83403300 | 3.98970600  |
| C  | 6.65526600  | -1.67259300 | -1.58533800 | C | -0.57844500 | -1.28168300 | 2.99927600  |
| H  | 4.97149700  | -0.43657800 | -1.11701800 | H | 0.48289300  | -1.53822100 | 2.84732900  |
| C  | 6.59046600  | -3.96168100 | -0.73933500 | H | -0.84931700 | -0.53449400 | 2.23199300  |
| H  | 4.83807600  | -4.48794400 | 0.41183100  | H | -0.68634100 | -0.81308700 | 3.99421800  |
| C  | 7.25207300  | -2.94404200 | -1.46342800 | C | -3.54724100 | 1.78701300  | 2.88533500  |
| H  | 7.13611700  | -0.87612200 | -2.15736200 | C | -4.32517700 | 2.10903200  | 4.17452800  |
| H  | 7.06527100  | -4.94433500 | -0.66175600 | H | -5.30928000 | 1.60897400  | 4.18533500  |
| O  | 8.44930600  | -3.29212000 | -2.00867100 | H | -3.75815500 | 1.76781800  | 5.05836800  |
| C  | 9.15697900  | -2.29151500 | -2.75097000 | H | -4.49596500 | 3.19482000  | 4.28246500  |
| H  | 9.40494300  | -1.41952300 | -2.11892700 | C | -5.92964800 | 0.63708300  | -1.52515100 |
| H  | 10.08576700 | -2.77546900 | -3.08631700 | H | -5.74060100 | -0.37415100 | -1.12485400 |
| H  | 8.57924900  | -1.95795000 | -3.63234000 | C | -3.28565200 | -3.18376300 | -1.87103200 |
| O  | 2.72421200  | -3.19154700 | 0.78645500  | C | -4.02045500 | -4.47221600 | -2.28485900 |
| C  | 1.73746900  | -0.79410400 | 1.31439400  | H | -3.32349900 | -5.20780700 | -2.72399200 |
| C  | 0.73620000  | -1.75281100 | 0.83110000  | H | -4.51479100 | -4.94930200 | -1.42071200 |
| C  | -0.23471900 | -2.44699100 | 0.43306000  | H | -4.79377500 | -4.24799200 | -3.04071000 |
| H  | -0.55142900 | -3.45492700 | 0.18041200  | C | -5.07839000 | 0.79363600  | -2.79995700 |
| H  | 3.58932900  | -0.12963600 | 0.49356500  | H | -4.00281800 | 0.67481200  | -2.57873600 |
| H  | 1.86014100  | -0.94040000 | 2.40721000  | H | -5.36287900 | 0.03229300  | -3.54768800 |
| H  | 1.38679000  | 0.23763400  | 1.14615700  | H | -5.22262200 | 1.78941100  | -3.25614600 |
| Sb | 3.61881900  | 2.73352100  | -0.75942400 | C | -7.43266400 | 0.73082600  | -1.84037600 |
| F  | 4.54847100  | 1.48057400  | 0.39416300  | H | -7.71824400 | -0.05158100 | -2.56504400 |
| F  | 3.19400900  | 3.79468000  | 0.77466300  | H | -8.04346200 | 0.59464700  | -0.93102000 |
| F  | 2.64219400  | 3.93403100  | -1.88851500 | H | -7.69801200 | 1.70647300  | -2.28388800 |
| F  | 5.22299900  | 3.73838900  | -0.99630100 | C | -2.14671000 | 2.42717000  | 2.90265600  |
| F  | 4.07993400  | 1.63185000  | -2.25666500 | H | -1.57539900 | 2.16382600  | 1.99453100  |
| F  | 2.03120700  | 1.67516400  | -0.50162700 | H | -2.20559300 | 3.52862600  | 2.96039100  |

### TS1\_gendo\_SbF6

|    |             |             |             |   |             |             |             |
|----|-------------|-------------|-------------|---|-------------|-------------|-------------|
| N  | 2.38710600  | 0.84042100  | -1.88584400 | H | -3.40793000 | 0.69321200  | 2.84662100  |
| C  | 2.53271800  | 2.19825200  | -1.94102200 | C | -2.65271600 | -2.48960500 | -3.09104800 |
| C  | -3.28392200 | -0.66499300 | 0.46181400  | H | -3.42836300 | -2.23404600 | -3.83451500 |
| C  | -4.60600100 | -2.26017800 | 1.39152600  | H | -2.13776800 | -1.55796400 | -2.79415000 |
| C  | -5.28887500 | -1.07407900 | 1.44649900  | H | -1.91114600 | -3.14145200 | -3.58550300 |
| H  | -4.87080600 | -3.26214000 | 1.71866600  | H | -4.03839400 | -2.49369700 | -1.45086900 |
| H  | -6.27189600 | -0.82350400 | 1.83643300  | C | 3.86639100  | 2.75776700  | -1.58407200 |
| N  | -4.46333100 | -0.11221800 | 0.86880300  | C | 5.04473100  | 1.98791200  | -1.52105000 |
| N  | -3.38255300 | -1.98594800 | 0.78908100  | C | 3.95166200  | 4.14599400  | -1.33461200 |
| Au | -1.70541100 | 0.21133000  | -0.44989200 | C | 6.27418100  | 2.57589700  | -1.20557200 |
| C  | -2.31991700 | -2.92172500 | 0.50390400  | H | 5.02597700  | 0.91483400  | -1.72891100 |
| C  | -2.24251300 | -3.46702400 | -0.79693300 | C | 5.16639400  | 4.74280000  | -1.01603500 |
| C  | -1.35759700 | -3.16259400 | 1.51064500  | H | 3.03844700  | 4.74436300  | -1.39764600 |
| C  | -1.13151400 | -4.28123800 | -1.08404900 | C | 6.34162500  | 3.96069200  | -0.94917500 |
| C  | -0.25749900 | -3.96288900 | 1.16040700  | H | 7.17018400  | 1.95286300  | -1.16708300 |
|    |             |             |             | H | 5.23756400  | 5.81590800  | -0.81507400 |

|    |             |             |             |   |             |             |             |
|----|-------------|-------------|-------------|---|-------------|-------------|-------------|
| O  | 7.48235500  | 4.63397000  | -0.63743200 | H | -5.15368600 | 0.72071300  | -4.85678100 |
| C  | 8.70089600  | 3.88201800  | -0.58395800 | H | -5.89094600 | -0.89696500 | -4.74404200 |
| H  | 8.93206100  | 3.42096800  | -1.56166600 | C | -5.58363900 | -1.61227900 | 1.81495400  |
| H  | 9.48582700  | 4.60814800  | -0.32762900 | H | -5.31670800 | -0.54628600 | 1.92240900  |
| H  | 8.65816300  | 3.09800300  | 0.19381700  | C | -2.31110700 | 1.53809500  | 3.21953600  |
| O  | 1.58574900  | 2.95563700  | -2.28495000 | C | -2.60346300 | 2.51002700  | 4.37620600  |
| C  | 1.12618000  | 0.17612500  | -2.16113200 | H | -1.68005000 | 2.79779900  | 4.90891800  |
| C  | -0.00202000 | 0.87457800  | -1.45135900 | H | -3.08641200 | 3.43397300  | 4.01330300  |
| C  | -0.30023700 | 2.08308300  | -1.23488900 | H | -3.27859100 | 2.03692500  | 5.11100500  |
| H  | -0.69037900 | 3.05000800  | -0.95336600 | C | -4.47012800 | -2.43696400 | 2.48987200  |
| H  | 3.06912900  | 0.28918800  | -1.34934800 | H | -3.49473500 | -2.26188300 | 2.00150200  |
| H  | 0.89399800  | 0.21735100  | -3.24196500 | H | -4.37866500 | -2.16350200 | 3.55629000  |
| H  | 1.22348300  | -0.87804100 | -1.87138800 | H | -4.68952200 | -3.51826700 | 2.43231800  |
| Sb | 3.49882500  | -2.56900300 | 0.23499200  | C | -6.93600900 | -1.81965300 | 2.51793700  |
| F  | 2.09674000  | -1.58398300 | 1.09721200  | H | -6.86565900 | -1.50635200 | 3.57437800  |
| F  | 4.17586900  | -0.88957600 | -0.46943100 | H | -7.73532500 | -1.22841400 | 2.03814500  |
| F  | 4.60997100  | -2.34222200 | 1.77009000  | H | -7.24594400 | -2.87947200 | 2.50738200  |
| F  | 4.89835400  | -3.48349100 | -0.68728900 | C | -3.28168900 | -0.96594400 | -3.67446900 |
| F  | 2.85253800  | -4.23386400 | 0.92909700  | H | -2.54127600 | -1.19770000 | -2.88762200 |
| F  | 2.37884200  | -2.74430600 | -1.31666700 | H | -3.49289100 | -1.89785300 | -4.22900400 |

### Int2\_5exo\_SbF6

|    |             |             |             |    |             |             |             |
|----|-------------|-------------|-------------|----|-------------|-------------|-------------|
| N  | 3.02971200  | -0.30535300 | 0.30700400  | H  | -4.28966100 | 0.55709700  | -2.54751900 |
| C  | 3.42413400  | -1.51130900 | -0.06535400 | C  | -1.67126200 | 0.23394700  | 3.73248100  |
| C  | -3.22664000 | 0.33104700  | 0.06732100  | H  | -2.33322200 | -0.25920300 | 4.46648100  |
| C  | -4.31074800 | 2.31889100  | 0.35705000  | H  | -1.49187800 | -0.47092400 | 2.90090800  |
| C  | -5.24058200 | 1.39784400  | -0.04390900 | H  | -0.70352900 | 0.43253800  | 4.22750400  |
| H  | -4.39805000 | 3.37428700  | 0.60150500  | H  | -3.27821300 | 1.27067500  | 2.75979700  |
| H  | -6.30902400 | 1.48075300  | -0.22504700 | C  | 4.77499800  | -1.96640400 | -0.29615000 |
| N  | -4.55863800 | 0.19489500  | -0.21375000 | C  | 5.86460300  | -1.06710400 | -0.23548500 |
| N  | -3.09202300 | 1.64946700  | 0.41725000  | C  | 5.01176000  | -3.32699200 | -0.61871600 |
| Au | -1.69722800 | -1.00293900 | -0.06046200 | C  | 7.16103700  | -1.50760500 | -0.48862000 |
| C  | -1.82563000 | 2.23412900  | 0.79096300  | H  | 5.70349900  | -0.01116100 | -0.00489200 |
| C  | -1.43611100 | 2.17810900  | 2.14859600  | C  | 6.30156800  | -3.77086500 | -0.86689500 |
| C  | -1.01179800 | 2.78731900  | -0.22328600 | H  | 4.17330200  | -4.02629600 | -0.67173800 |
| C  | -0.17256400 | 2.70262100  | 2.47981500  | C  | 7.38912000  | -2.86565600 | -0.80809200 |
| C  | 0.24135400  | 3.29725000  | 0.16242800  | H  | 7.98398700  | -0.79151900 | -0.44799800 |
| C  | 0.65954000  | 3.25316900  | 1.49753300  | H  | 6.50229500  | -4.81623000 | -1.11660500 |
| H  | 0.16368800  | 2.66838200  | 3.52128400  | O  | 8.60283900  | -3.39625400 | -1.07628600 |
| H  | 0.91339900  | 3.71568800  | -0.59032700 | C  | 9.74377500  | -2.52247500 | -1.05412300 |
| H  | 1.64738000  | 3.64413400  | 1.75979600  | H  | 9.89087900  | -2.08436200 | -0.05121100 |
| C  | -5.14795000 | -1.04640100 | -0.65131400 | H  | 10.60348300 | -3.15884400 | -1.30680900 |
| C  | -5.65123500 | -1.93250000 | 0.32716900  | H  | 9.64491600  | -1.71845200 | -1.80455900 |
| C  | -5.15642000 | -1.33243200 | -2.03444500 | O  | 2.40106800  | -2.34696800 | -0.24572900 |
| C  | -6.18142800 | -3.15450600 | -0.12447700 | C  | 1.57198400  | -0.20729300 | 0.35113200  |
| C  | -5.70042700 | -2.56734100 | -2.43231600 | C  | 1.16145900  | -1.61128000 | -0.04349400 |
| C  | -6.20616700 | -3.46890500 | -1.48863800 | C  | -0.03883700 | -2.17301100 | -0.22883800 |
| H  | -6.57163600 | -3.87176200 | 0.60444100  | H  | -0.04075900 | -3.23257100 | -0.52358800 |
| H  | -5.71669700 | -2.82701900 | -3.49590600 | H  | 3.64615800  | 0.51447500  | 0.43231800  |
| H  | -6.61926700 | -4.42770100 | -1.81885500 | H  | 1.23086800  | 0.07540700  | 1.36242400  |
| C  | -1.42415500 | 2.80083600  | -1.68981200 | H  | 1.22832700  | 0.56565500  | -0.35625300 |
| H  | -2.46883800 | 2.45010300  | -1.75893600 | Sb | 4.42742800  | 3.07347800  | -1.10183200 |
| C  | -1.37043500 | 4.22027500  | -2.28234800 | F  | 4.57346700  | 1.99196800  | 0.52454900  |
| H  | -1.73320600 | 4.21085700  | -3.32527900 | F  | 3.27124900  | 4.27716100  | -0.15971500 |
| H  | -1.99855900 | 4.92251400  | -1.70676300 | F  | 4.27181200  | 4.11335900  | -2.69052400 |
| H  | -0.33977500 | 4.61586400  | -2.29188900 | F  | 5.94566600  | 4.07267800  | -0.52667000 |
| C  | -0.55058700 | 1.82510300  | -2.50231400 | F  | 5.56450200  | 1.80497100  | -1.96922100 |
| H  | 0.51537100  | 2.10912800  | -2.45697700 | F  | 2.90072600  | 2.01499300  | -1.59374500 |
| H  | -0.64876500 | 0.79487100  | -2.11412500 |    |             |             |             |
| H  | -0.85871600 | 1.82296700  | -3.56317800 |    |             |             |             |
| C  | -4.56817700 | -0.37717400 | -3.06465100 |    |             |             |             |
| C  | -5.59014700 | -0.01219300 | -4.15557900 |    |             |             |             |
| H  | -6.50323800 | 0.43103300  | -3.72113100 |    |             |             |             |

### Int2\_6endo\_SbF6

|   |             |             |             |
|---|-------------|-------------|-------------|
| N | 2.49808400  | 0.80865100  | -0.80384700 |
| C | 2.69364600  | 2.02337600  | -1.27808700 |
| C | -3.40647800 | -0.57448600 | 0.47826000  |
| C | -4.66856300 | -2.35261300 | 1.14646700  |

|    |             |             |             |                      |             |             |             |
|----|-------------|-------------|-------------|----------------------|-------------|-------------|-------------|
| C  | -5.45553700 | -1.23501900 | 1.22703800  | H                    | -3.95137500 | -2.42350800 | -1.57902700 |
| H  | -4.87261800 | -3.39688000 | 1.36838900  | C                    | 4.01547300  | 2.59798700  | -1.49688100 |
| H  | -6.48925300 | -1.10059800 | 1.53453700  | C                    | 5.17970900  | 1.79639000  | -1.49465600 |
| N  | -4.66630600 | -0.16337500 | 0.81381300  | C                    | 4.14247900  | 3.99244500  | -1.72039600 |
| N  | -3.42501800 | -1.92809400 | 0.69072600  | C                    | 6.43693700  | 2.36279600  | -1.69696300 |
| Au | -1.75598700 | 0.42840300  | -0.15543400 | H                    | 5.11988500  | 0.71574800  | -1.33963000 |
| C  | -2.27645000 | -2.76477900 | 0.42513600  | C                    | 5.39080000  | 4.56218500  | -1.92528600 |
| C  | -2.10089100 | -3.25669500 | -0.88784000 | H                    | 3.24996400  | 4.62267000  | -1.72156600 |
| C  | -1.34185300 | -2.97898900 | 1.46346500  | C                    | 6.55231300  | 3.75417200  | -1.91307300 |
| C  | -0.92964200 | -3.99106900 | -1.14847400 | H                    | 7.31841500  | 1.71881100  | -1.69095500 |
| C  | -0.18440900 | -3.71100000 | 1.14474200  | H                    | 5.50097400  | 5.63719800  | -2.09255100 |
| C  | 0.02361700  | -4.20728300 | -0.14719400 | O                    | 7.72074600  | 4.40446100  | -2.12008400 |
| H  | -0.75397400 | -4.37767600 | -2.15777600 | C                    | 8.93113200  | 3.63060600  | -2.10684600 |
| H  | 0.58359000  | -3.87010500 | 1.90600700  | H                    | 8.92578000  | 2.86837400  | -2.90610800 |
| H  | 0.94646700  | -4.74985200 | -0.36801700 | H                    | 9.74143100  | 4.35005200  | -2.29026300 |
| C  | -5.09662200 | 1.21124900  | 0.74702100  | H                    | 9.08240200  | 3.14491600  | -1.12662400 |
| C  | -5.65832100 | 1.68194900  | -0.46115800 | O                    | 1.66459500  | 2.80982000  | -1.57675300 |
| C  | -4.90284900 | 2.02963000  | 1.88191800  | C                    | 1.17672000  | 0.15571100  | -0.68900100 |
| C  | -6.04408600 | 3.03380300  | -0.50672400 | C                    | 0.05089800  | 1.16185700  | -0.74594800 |
| C  | -5.31058600 | 3.37254700  | 1.78345100  | C                    | 0.34293300  | 2.39528700  | -1.17972800 |
| C  | -5.87559600 | 3.86968200  | 0.60359400  | H                    | -0.32345700 | 3.24780400  | -1.30986300 |
| H  | -6.47387100 | 3.43772600  | -1.42874600 | H                    | 3.31073200  | 0.25807900  | -0.48107500 |
| H  | -5.17171500 | 4.03774100  | 2.64161500  | H                    | 1.08430200  | -0.60050400 | -1.49042200 |
| H  | -6.18142200 | 4.91947300  | 0.54603900  | H                    | 1.18695300  | -0.40091100 | 0.26028900  |
| C  | -1.53356100 | -2.40607400 | 2.86266900  | Sb                   | 3.82133200  | -2.70041800 | 0.59404700  |
| H  | -2.56355500 | -2.01411000 | 2.93644800  | F                    | 2.48165500  | -1.83399600 | 1.66428000  |
| C  | -1.36812000 | -3.48356900 | 3.94930200  | F                    | 4.52097800  | -0.93217600 | 0.15059400  |
| H  | -1.57350400 | -3.05399400 | 4.94568100  | F                    | 4.97452500  | -2.75834100 | 2.11241500  |
| H  | -2.05996500 | -4.32933700 | 3.79111900  | F                    | 5.17884000  | -3.49648100 | -0.48473800 |
| H  | -0.33987200 | -3.88490200 | 3.96673200  | F                    | 3.08882000  | -4.41489400 | 1.02879700  |
| C  | -0.56872400 | -1.22805100 | 3.10177000  | F                    | 2.68933100  | -2.55651900 | -0.94516400 |
| H  | 0.48272100  | -1.55338500 | 3.02515200  |                      |             |             |             |
| H  | -0.73039400 | -0.42992800 | 2.35414300  | <b>TS2_5exo_SbF6</b> |             |             |             |
| H  | -0.72572800 | -0.79826500 | 4.10755400  | N                    | 2.04254100  | 0.77403200  | -2.97855200 |
| C  | -4.23938600 | 1.51571000  | 3.15332600  | C                    | 2.56075300  | 0.34234800  | -1.87810100 |
| C  | -5.12754500 | 1.73468300  | 4.39068100  | C                    | -2.01864000 | 0.68901700  | 0.67621000  |
| H  | -6.11108500 | 1.24780800  | 4.27022000  | C                    | -3.70408600 | 1.56277100  | 1.92442800  |
| H  | -4.64268000 | 1.31070800  | 5.28752100  | C                    | -2.56862600 | 2.26976000  | 2.21107900  |
| H  | -5.30294500 | 2.80802000  | 4.58262500  | H                    | -4.72385200 | 1.65827000  | 2.28684400  |
| C  | -5.79600900 | 0.79278600  | -1.69090700 | H                    | -2.39179800 | 3.10525500  | 2.88220200  |
| H  | -5.59671900 | -0.24916300 | -1.38522500 | N                    | -1.54544300 | 1.71870200  | 1.44151300  |
| C  | -3.09635700 | -2.97601400 | -2.00645600 | N                    | -3.34680900 | 0.60194300  | 0.98233300  |
| C  | -3.64595800 | -4.27820300 | -2.61527200 | Au                   | -0.98834000 | -0.50336900 | -0.57000800 |
| H  | -2.84344200 | -4.87703100 | -3.08081100 | C                    | -4.27526600 | -0.26183900 | 0.29039700  |
| H  | -4.13500100 | -4.90566900 | -1.84985600 | C                    | -4.91755700 | 0.25758200  | -0.85652500 |
| H  | -4.38988400 | -4.04978700 | -3.39884800 | C                    | -4.48212700 | -1.57403600 | 0.77212100  |
| C  | -4.73696000 | 1.17480800  | -2.74334700 | C                    | -5.82877200 | -0.58429800 | -1.51960600 |
| H  | -3.71760400 | 1.10317000  | -2.32333600 | C                    | -5.41003100 | -2.36895300 | 0.07486500  |
| H  | -4.79994200 | 0.50249200  | -3.61722300 | C                    | -6.07890800 | -1.87980200 | -1.05380900 |
| H  | -4.88720200 | 2.21041300  | -3.09788500 | H                    | -6.34040700 | -0.22000900 | -2.41622800 |
| C  | -7.21401800 | 0.83203800  | -2.28581100 | H                    | -5.60309800 | -3.38994800 | 0.41659400  |
| H  | -7.28915900 | 0.12486700  | -3.13053000 | H                    | -6.79338500 | -2.51981500 | -1.58184500 |
| H  | -7.97465300 | 0.55170100  | -1.53648400 | C                    | -0.19010200 | 2.22258900  | 1.38890900  |
| H  | -7.47113800 | 1.83446300  | -2.67101500 | C                    | 0.17556500  | 3.04308400  | 0.29214600  |
| C  | -2.85327300 | 2.16464700  | 3.33168700  | C                    | 0.69832600  | 1.88158300  | 2.43342400  |
| H  | -2.21064200 | 1.97177500  | 2.45396500  | C                    | 1.48755600  | 3.54834100  | 0.28297200  |
| H  | -2.93902600 | 3.25891700  | 3.45747900  | C                    | 1.99320400  | 2.43031100  | 2.37724400  |
| H  | -2.34810500 | 1.75778600  | 4.22537900  | C                    | 2.38272300  | 3.25463900  | 1.31803500  |
| H  | -4.08404400 | 0.42822800  | 3.04646100  | H                    | 1.81640700  | 4.17346300  | -0.55158500 |
| C  | -2.46173700 | -2.07935300 | -3.08604100 | H                    | 2.71291200  | 2.18561900  | 3.16357200  |
| H  | -3.20174800 | -1.83445600 | -3.86883000 | H                    | 3.40182700  | 3.65188500  | 1.28385300  |
| H  | -2.09293100 | -1.13507700 | -2.64644800 | C                    | -3.75017900 | -2.10202700 | 1.99879700  |
| H  | -1.60770800 | -2.58305300 | -3.57306900 | H                    | -2.81995200 | -1.52129400 | 2.11490400  |

|    |             |             |             |
|----|-------------|-------------|-------------|
| C  | -4.59864400 | -1.88230100 | 3.26686900  |
| H  | -4.05276700 | -2.23666900 | 4.15896700  |
| H  | -4.83593700 | -0.81406800 | 3.41548400  |
| H  | -5.55277900 | -2.43653100 | 3.20629500  |
| C  | -3.33401600 | -3.57414400 | 1.85436100  |
| H  | -4.20487400 | -4.25348800 | 1.83790500  |
| H  | -2.75100900 | -3.73789400 | 0.93228200  |
| H  | -2.69811200 | -3.86870000 | 2.70414000  |
| C  | 0.29323600  | 0.96382500  | 3.58061300  |
| C  | -0.13559000 | 1.78373000  | 4.81392500  |
| H  | -0.98001600 | 2.45801700  | 4.59166600  |
| H  | -0.44378100 | 1.11108200  | 5.63369800  |
| H  | 0.70321500  | 2.40320600  | 5.17947100  |
| C  | -0.81055700 | 3.39749100  | -0.81672200 |
| H  | -1.50133800 | 2.54440600  | -0.93628300 |
| C  | -4.60513000 | 1.64439300  | -1.40636100 |
| C  | -5.87259800 | 2.49531300  | -1.59759100 |
| H  | -6.54979900 | 2.05927200  | -2.35291500 |
| H  | -6.43710700 | 2.59513700  | -0.65433300 |
| H  | -5.59983300 | 3.50881900  | -1.94074900 |
| C  | -0.13608900 | 3.62102400  | -2.17931800 |
| H  | 0.55523500  | 2.79944700  | -2.43593000 |
| H  | -0.90515600 | 3.68465400  | -2.96903400 |
| H  | 0.43552500  | 4.56589400  | -2.20728500 |
| C  | -1.65373600 | 4.62702700  | -0.42034900 |
| H  | -2.39252200 | 4.85893400  | -1.20866700 |
| H  | -2.20372900 | 4.46238800  | 0.52180700  |
| H  | -1.00844100 | 5.51380200  | -0.28613400 |
| C  | 1.40996200  | -0.02399800 | 3.95877900  |
| H  | 1.81355600  | -0.53634600 | 3.07287000  |
| H  | 2.24415100  | 0.48291700  | 4.47621000  |
| H  | 1.01671700  | -0.79206900 | 4.64604500  |
| H  | -0.57235900 | 0.36582400  | 3.24596300  |
| C  | -3.80644900 | 1.52792200  | -2.71910700 |
| H  | -3.54016500 | 2.52996400  | -3.10045700 |
| H  | -2.87450500 | 0.95469700  | -2.56438100 |
| H  | -4.39540500 | 1.01323900  | -3.49906000 |
| H  | -3.96547100 | 2.17098600  | -0.67717500 |
| C  | 3.68533300  | 0.87960600  | -1.12620800 |
| C  | 4.36645600  | 2.01369000  | -1.61300100 |
| C  | 4.09334700  | 0.29959300  | 0.09743800  |
| C  | 5.43395700  | 2.56835800  | -0.90481900 |
| H  | 4.04575400  | 2.46021000  | -2.55863000 |
| C  | 5.15677000  | 0.84619100  | 0.80876300  |
| H  | 3.56712100  | -0.57319400 | 0.49183600  |
| C  | 5.83571500  | 1.98296900  | 0.31688300  |
| H  | 5.94677000  | 3.44641200  | -1.30341000 |
| H  | 5.48135400  | 0.41005200  | 1.75787900  |
| O  | 6.85759800  | 2.43781300  | 1.09075600  |
| C  | 7.58694800  | 3.58112600  | 0.62947600  |
| H  | 6.93408000  | 4.46905800  | 0.54301100  |
| H  | 8.35721200  | 3.76810200  | 1.39148700  |
| H  | 8.07411800  | 3.38403000  | -0.34287200 |
| O  | 1.95187400  | -0.79515400 | -1.31720300 |
| C  | 0.94173500  | -0.13874400 | -3.29239300 |
| C  | 0.83639400  | -1.05735000 | -2.08436800 |
| C  | -0.03968500 | -2.07457200 | -1.74842200 |
| H  | -0.76520200 | -2.33417700 | -2.53362700 |
| H  | 0.20344600  | -2.86912400 | -0.86826300 |
| H  | 0.00778200  | 0.40925000  | -3.49777100 |
| H  | 1.17954100  | -0.72942700 | -4.19984100 |
| Sb | 0.96135600  | -3.59766000 | 1.92593500  |
| F  | -0.44158700 | -2.33436200 | 2.26648800  |

|   |             |             |            |
|---|-------------|-------------|------------|
| F | -0.23844500 | -5.03599900 | 2.29376700 |
| F | 0.36709000  | -3.67485900 | 0.02841900 |
| F | 2.34913000  | -4.82889900 | 1.48621900 |
| F | 2.10639600  | -2.14260300 | 1.42774300 |
| F | 1.52835700  | -3.51863100 | 3.74336500 |

### TS2\_6endo\_SbF6

|    |             |             |             |
|----|-------------|-------------|-------------|
| N  | -2.15090000 | -0.20676600 | -2.70901500 |
| C  | -2.80344700 | -0.78915000 | -1.77262100 |
| C  | 1.08567400  | 0.98026800  | 1.08517000  |
| C  | 1.64572100  | 2.86211200  | 2.23258800  |
| C  | 1.96053000  | 1.79064500  | 3.02338600  |
| H  | 1.73354500  | 3.93195200  | 2.40048800  |
| H  | 2.37682900  | 1.73002600  | 4.02522800  |
| N  | 1.61868800  | 0.65021000  | 2.30159600  |
| N  | 1.11771600  | 2.34646100  | 1.05175500  |
| Au | 0.39522800  | -0.30621900 | -0.30360400 |
| C  | 0.55913500  | 3.13468000  | -0.02261700 |
| C  | 1.37831800  | 3.45737000  | -1.12980100 |
| C  | -0.79391100 | 3.52600100  | 0.08608400  |
| C  | 0.78355000  | 4.20007000  | -2.16528300 |
| C  | -1.33802100 | 4.26022200  | -0.98347400 |
| C  | -0.55925700 | 4.59167000  | -2.09669300 |
| H  | 1.37832600  | 4.46676000  | -3.04317400 |
| H  | -2.38806100 | 4.56617800  | -0.94402200 |
| H  | -1.00227900 | 5.15887700  | -2.92183700 |
| C  | 1.71464500  | -0.70499400 | 2.79199100  |
| C  | 2.91766900  | -1.41805400 | 2.57739800  |
| C  | 0.58867000  | -1.25859500 | 3.44268500  |
| C  | 2.98003100  | -2.72988200 | 3.07956100  |
| C  | 0.70711300  | -2.57697300 | 3.92190100  |
| C  | 1.89025800  | -3.30195900 | 3.74776500  |
| H  | 3.89115300  | -3.31701600 | 2.93412200  |
| H  | -0.14452200 | -3.03806100 | 4.43273500  |
| H  | 1.96228700  | -4.32680200 | 4.12642900  |
| C  | -1.65766000 | 3.14786700  | 1.28331200  |
| H  | -0.99505500 | 2.75979500  | 2.07690600  |
| C  | -2.40249000 | 4.36053300  | 1.86778600  |
| H  | -2.95580200 | 4.06219200  | 2.77556400  |
| H  | -1.70533900 | 5.17141900  | 2.14186700  |
| H  | -3.13766300 | 4.77269100  | 1.15450700  |
| C  | -2.63719800 | 2.02121700  | 0.90622200  |
| H  | -3.33349300 | 2.34522900  | 0.11350700  |
| H  | -2.09426000 | 1.13671800  | 0.53254900  |
| H  | -3.23735800 | 1.71822500  | 1.78259300  |
| C  | -0.71640300 | -0.49211700 | 3.62421200  |
| C  | -1.01991400 | -0.25658400 | 5.11504100  |
| H  | -0.20174700 | 0.29441300  | 5.61093400  |
| H  | -1.94796100 | 0.33114300  | 5.22860700  |
| H  | -1.15752300 | -1.21154500 | 5.65263200  |
| C  | 4.09809700  | -0.79156700 | 1.84518200  |
| H  | 3.69493200  | -0.03528800 | 1.14891800  |
| C  | 2.84951900  | 3.06076200  | -1.18198700 |
| C  | 3.71730800  | 4.12752100  | -0.48214400 |
| H  | 3.61973700  | 5.10410900  | -0.98967100 |
| H  | 3.43176100  | 4.26477200  | 0.57486000  |
| H  | 4.78120300  | 3.83229600  | -0.51023800 |
| C  | 4.88842200  | -1.80533500 | 1.00405600  |
| H  | 4.23174700  | -2.39323900 | 0.34368400  |

|                 |             |             |             |    |             |             |             |
|-----------------|-------------|-------------|-------------|----|-------------|-------------|-------------|
| H               | 5.61511700  | -1.27374000 | 0.36747500  | H  | 4.72475100  | 1.29415000  | 0.84922500  |
| H               | 5.45879900  | -2.50709400 | 1.63832400  | H  | 4.64534300  | -1.51868000 | 0.82865200  |
| C               | 5.03565500  | -0.07073200 | 2.83545500  | N  | 2.56991400  | -1.13212900 | 0.33090700  |
| H               | 5.87423900  | 0.40017400  | 2.29274500  | N  | 2.63093200  | 1.03234900  | 0.34554200  |
| H               | 4.51238900  | 0.71960100  | 3.40002300  | Au | -0.13539500 | 0.03673900  | -0.24730100 |
| H               | 5.45856100  | -0.78524600 | 3.56459400  | C  | 2.21352800  | 2.41278400  | 0.29188500  |
| C               | -1.88520300 | -1.21275700 | 2.92644800  | C  | 2.28920500  | 3.09121000  | -0.94454100 |
| H               | -2.06785300 | -2.20756300 | 3.37043400  | C  | 1.72657600  | 3.00744600  | 1.47706200  |
| H               | -2.81378000 | -0.62392800 | 3.02600400  | C  | 1.86454900  | 4.43185700  | -0.96719600 |
| H               | -1.68371900 | -1.35158800 | 1.85036000  | C  | 1.31811900  | 4.35126200  | 1.39812400  |
| H               | -0.60615600 | 0.49729800  | 3.14741400  | C  | 1.38698500  | 5.05606900  | 0.19116900  |
| C               | 3.35938800  | 2.81060000  | -2.60927500 | H  | 1.89889000  | 4.98881600  | -1.90868900 |
| H               | 4.37179300  | 2.37492400  | -2.57114700 | H  | 0.93118100  | 4.84560300  | 2.29491900  |
| H               | 2.71293400  | 2.10717500  | -3.15699600 | H  | 1.05844500  | 6.09975800  | 0.15088400  |
| H               | 3.42746200  | 3.74647900  | -3.19219000 | C  | 2.08074400  | -2.48758900 | 0.25903000  |
| H               | 2.96605200  | 2.11443400  | -0.62625200 | C  | 2.14077400  | -3.15874100 | -0.98222400 |
| C               | -4.11446000 | -0.32590700 | -1.28590300 | C  | 1.55210300  | -3.06824700 | 1.43311500  |
| C               | -4.76911800 | 0.72790600  | -1.95407000 | C  | 1.66148600  | -4.48035300 | -1.02011400 |
| C               | -4.71747400 | -0.87384200 | -0.13092100 | C  | 1.09124900  | -4.39403500 | 1.33955700  |
| C               | -5.98549200 | 1.23527400  | -1.49052800 | C  | 1.14710400  | -5.09316500 | 0.12864500  |
| H               | -4.29943200 | 1.15423800  | -2.84500900 | H  | 1.68263600  | -5.03136200 | -1.96531400 |
| C               | -5.93065700 | -0.37666700 | 0.34050100  | H  | 0.67438200  | -4.87894600 | 2.22792000  |
| H               | -4.22392600 | -1.68909200 | 0.40373600  | H  | 0.77831300  | -6.12282600 | 0.07732200  |
| C               | -6.57496800 | 0.68349000  | -0.33249900 | C  | 1.63162600  | 2.24860100  | 2.79474400  |
| H               | -6.46817000 | 2.05223300  | -2.03186300 | H  | 1.94680600  | 1.20573200  | 2.61646600  |
| H               | -6.40149700 | -0.79365400 | 1.23570200  | C  | 2.58712900  | 2.84653300  | 3.84457700  |
| O               | -7.75353300 | 1.09903400  | 0.20925400  | H  | 2.53152400  | 2.27095000  | 4.78541400  |
| C               | -8.43567800 | 2.17944200  | -0.43661100 | H  | 3.63440900  | 2.83152900  | 3.49483200  |
| H               | -8.71153000 | 1.92144000  | -1.47545500 | H  | 2.32319700  | 3.89414200  | 4.07473400  |
| H               | -9.35016700 | 2.34499100  | 0.15160700  | C  | 0.18407800  | 2.20934800  | 3.31669600  |
| H               | -7.82617600 | 3.10195300  | -0.43338900 | H  | -0.17888000 | 3.22090800  | 3.57149500  |
| O               | -2.35238400 | -1.91211200 | -1.05062800 | H  | -0.50914900 | 1.78011200  | 2.57307200  |
| C               | -0.86405900 | -0.78391800 | -3.12287200 | H  | 0.12866200  | 1.59410700  | 4.23244800  |
| C               | -0.14342900 | -1.54996800 | -2.02703600 | C  | 1.47042800  | -2.31222800 | 2.75304600  |
| C               | -0.97736600 | -2.09451800 | -1.07598300 | C  | 2.41735700  | -2.92911300 | 3.79961600  |
| H               | -0.69505100 | -2.83846700 | -0.32221700 | H  | 3.46414400  | -2.93099400 | 3.44804800  |
| H               | 1.14100400  | -2.03555500 | -2.22111100 | H  | 2.37354200  | -2.35510700 | 4.74211500  |
| H               | -1.04944500 | -1.47269600 | -3.97507400 | H  | 2.13596100  | -3.97284300 | 4.02716000  |
| H               | -0.23069900 | 0.02455700  | -3.52149300 | C  | 2.64139000  | -2.47632500 | -2.24847900 |
| Sb              | 3.63724200  | -1.25860600 | -3.12546900 | H  | 3.10507000  | -1.51612600 | -1.96157500 |
| F               | 2.09699400  | -2.40228100 | -2.35459800 | C  | 2.75464200  | 2.40268900  | -2.22104400 |
| F               | 3.55831900  | -2.37363200 | -4.66379000 | C  | 3.87845800  | 3.18169800  | -2.92650800 |
| F               | 2.26050800  | -0.16505100 | -3.87116500 | H  | 3.53169600  | 4.16804700  | -3.28184900 |
| F               | 5.04588000  | -0.19340600 | -3.81996700 | H  | 4.73909400  | 3.34704200  | -2.25520000 |
| F               | 3.55178300  | -0.24330500 | -1.50777400 | H  | 4.23385900  | 2.61904800  | -3.80759900 |
| F               | 4.80659200  | -2.49982300 | -2.28024900 | C  | 1.45605700  | -2.15538000 | -3.17990600 |
| <b>MsOH</b>     |             |             |             | H  | 0.70307400  | -1.53379900 | -2.66276700 |
| O               | -1.46013000 | 2.32672700  | 0.11741300  | H  | 1.80461100  | -1.60671600 | -4.07311400 |
| S               | -0.04830000 | 1.89287300  | 0.08413700  | H  | 0.95623000  | -3.08015900 | -3.51912500 |
| O               | 0.88028500  | 2.37887700  | 1.12487500  | C  | 3.71365900  | -3.30554100 | -2.97637200 |
| O               | 0.58465700  | 2.21759400  | -1.41712000 | H  | 4.09023700  | -2.75034500 | -3.85333000 |
| C               | 0.05772600  | 0.11062900  | -0.04839700 | H  | 4.57089500  | -3.52680100 | -2.31673100 |
| H               | -0.32384700 | -0.29943700 | 0.89917300  | H  | 3.31071900  | -4.26636600 | -3.34215700 |
| H               | -0.56167700 | -0.22741800 | -0.89152800 | C  | 0.02475000  | -2.24607800 | 3.27675900  |
| H               | 1.11089800  | -0.17344400 | -0.18836100 | H  | -0.66046400 | -1.80257000 | 2.53413400  |
| H               | 0.52743000  | 3.19825900  | -1.54482100 | H  | -0.35845500 | -3.24957300 | 3.53398300  |
| <b>IPrAuOMs</b> |             |             |             | H  | -0.01687900 | -1.62932900 | 4.19225200  |
| C               | 1.78672200  | -0.02617800 | 0.14488700  | H  | 1.80185400  | -1.27440000 | 2.57569100  |
| C               | 3.91549000  | 0.59542200  | 0.65507800  | C  | 1.55854100  | 2.16886100  | -3.16431100 |
| C               | 3.87700900  | -0.77231800 | 0.64597600  | H  | 1.87883900  | 1.61620800  | -4.06559300 |
|                 |             |             |             | H  | 0.76719900  | 1.58379100  | -2.66205500 |
|                 |             |             |             | H  | 1.11644700  | 3.12733400  | -3.48958900 |
|                 |             |             |             | H  | 3.15956700  | 1.41201300  | -1.94973600 |

|   |             |             |             |
|---|-------------|-------------|-------------|
| O | -2.15989100 | 0.11336900  | -0.69671800 |
| S | -3.08446900 | 0.09358500  | 0.58314400  |
| O | -2.94864100 | 1.34938000  | 1.37534000  |
| O | -2.95657200 | -1.18932800 | 1.33262100  |
| C | -4.70309200 | 0.11074100  | -0.21011400 |
| H | -4.79671000 | 1.02232100  | -0.81861200 |
| H | -4.80417700 | -0.78507400 | -0.84041600 |
| H | -5.46683400 | 0.10455800  | 0.58256500  |

|   |             |             |             |
|---|-------------|-------------|-------------|
| H | -4.36975600 | -3.04526800 | -1.66131500 |
| H | -5.31902800 | -1.57172100 | -1.32117100 |
| C | -5.44383500 | -3.34002200 | 0.88196200  |
| H | -5.42071300 | -4.28549900 | 0.31210800  |
| H | -5.36411100 | -3.58417600 | 1.95559800  |
| H | -6.43037700 | -2.87351700 | 0.71401800  |
| C | -1.63508700 | 2.41515700  | 3.62167600  |
| H | -1.80114500 | 2.95953100  | 2.67873700  |
| H | -2.34993900 | 2.79234800  | 4.37544200  |
| H | -0.61909900 | 2.66206200  | 3.97177600  |
| H | -0.89823200 | 0.59049700  | 2.79875100  |
| C | -0.75906500 | -3.36139000 | -2.72934800 |
| H | -1.76693800 | -3.67114800 | -3.05837000 |
| H | -0.72551200 | -2.25766900 | -2.71964100 |
| H | -0.03503900 | -3.71644900 | -3.48350700 |
| H | -1.23330100 | -3.56017200 | -0.64885200 |
| C | 4.26330600  | 0.66592800  | -1.53788700 |
| C | 4.31983800  | 1.79993500  | -0.70483000 |
| C | 5.36559600  | -0.21642200 | -1.54688500 |
| C | 5.43059500  | 2.04083900  | 0.11280600  |
| H | 3.49909100  | 2.52501100  | -0.67479700 |
| C | 6.47499700  | 0.00750000  | -0.73551800 |
| H | 5.32347900  | -1.08669700 | -2.20786500 |
| C | 6.51301600  | 1.13917500  | 0.10999800  |
| H | 5.43492800  | 2.92711400  | 0.75092600  |
| H | 7.32877700  | -0.67740100 | -0.73642500 |
| O | 7.63478300  | 1.27223700  | 0.87463700  |
| C | 7.70247300  | 2.40542000  | 1.74740000  |
| H | 6.87606700  | 2.40075700  | 2.48184300  |
| H | 8.66224700  | 2.31444800  | 2.27706900  |
| H | 7.68544500  | 3.35443500  | 1.18039800  |
| O | 3.15227000  | -0.62576600 | -3.23027800 |
| C | 0.84004300  | 0.83482500  | -3.13929200 |
| C | -0.44401700 | 1.01266200  | -2.44663800 |
| C | -1.58591100 | 1.31346400  | -2.04062300 |
| H | -2.55578000 | 1.77988500  | -1.92708800 |
| H | 1.90111200  | 1.91522700  | -1.64837500 |
| H | 0.81928300  | 1.51138000  | -4.02067400 |
| H | 0.94413600  | -0.19629800 | -3.52501300 |
| O | 1.49945700  | 3.45412400  | -0.92748600 |
| S | 0.88145700  | 3.45626900  | 0.46558200  |
| O | 1.71320900  | 4.17769900  | 1.47840600  |
| O | 0.41999400  | 2.08671800  | 0.89913600  |
| C | -0.62394900 | 4.44017900  | 0.24166600  |
| H | -1.27272800 | 3.94093200  | -0.49516800 |
| H | -1.14793300 | 4.53043500  | 1.20534700  |
| H | -0.34386300 | 5.44044800  | -0.12336100 |

### Int1\_MsO

|    |             |             |             |
|----|-------------|-------------|-------------|
| N  | 1.97591000  | 1.09102600  | -2.28090100 |
| C  | 3.10073200  | 0.32096700  | -2.41645100 |
| C  | -0.97136300 | -1.46488400 | 0.94826500  |
| C  | -0.55857700 | -3.26113300 | 2.27380100  |
| C  | -1.71224900 | -2.67782300 | 2.72040400  |
| H  | -0.00980500 | -4.13360700 | 2.61808400  |
| H  | -2.39064500 | -2.94216600 | 3.52678100  |
| N  | -1.94360300 | -1.57553000 | 1.90078800  |
| N  | -0.11966000 | -2.50203300 | 1.19168800  |
| Au | -0.93913700 | -0.13553800 | -0.57189500 |
| C  | 1.06051000  | -2.78210900 | 0.40933300  |
| C  | 0.90352400  | -3.46150300 | -0.82103600 |
| C  | 2.31099000  | -2.35260100 | 0.90640800  |
| C  | 2.06933800  | -3.71917800 | -1.56339700 |
| C  | 3.44271600  | -2.63835500 | 0.12162400  |
| C  | 3.32459600  | -3.31168000 | -1.09867700 |
| H  | 1.98822800  | -4.24141900 | -2.52183900 |
| H  | 4.42658400  | -2.30612100 | 0.46512700  |
| H  | 4.21787200  | -3.51337800 | -1.69790400 |
| C  | -3.10763500 | -0.72264200 | 1.95812400  |
| C  | -4.25666800 | -1.13266400 | 1.24661800  |
| C  | -3.02909400 | 0.48826800  | 2.68809300  |
| C  | -5.37948100 | -0.28498100 | 1.29353200  |
| C  | -4.18291000 | 1.29221000  | 2.70294700  |
| C  | -5.34352000 | 0.91140000  | 2.01603000  |
| H  | -6.28721900 | -0.56667900 | 0.75010800  |
| H  | -4.17004800 | 2.23892800  | 3.24958500  |
| H  | -6.22574200 | 1.55955800  | 2.04102900  |
| C  | 2.46482700  | -1.61300500 | 2.22960800  |
| H  | 1.46939800  | -1.52235000 | 2.69739100  |
| C  | 3.36220600  | -2.40278900 | 3.20124400  |
| H  | 3.42745500  | -1.87787200 | 4.17052100  |
| H  | 2.96962600  | -3.41843800 | 3.38629800  |
| H  | 4.38893700  | -2.50498100 | 2.80711800  |
| C  | 3.00343400  | -0.18755400 | 2.01050800  |
| H  | 3.99342100  | -0.20345500 | 1.52345700  |
| H  | 2.31979900  | 0.41610500  | 1.39051000  |
| H  | 3.11387600  | 0.32658700  | 2.98227900  |
| C  | -1.75611900 | 0.89799300  | 3.42289700  |
| C  | -1.64424600 | 0.18027900  | 4.78462300  |
| H  | -1.62324600 | -0.91708000 | 4.68051100  |
| H  | -0.71510600 | 0.48676200  | 5.29638800  |
| H  | -2.49630100 | 0.44429700  | 5.43684900  |
| C  | -4.29661600 | -2.41897800 | 0.43061200  |
| H  | -3.35262000 | -2.96600600 | 0.59778300  |
| C  | -0.45231500 | -3.93314900 | -1.33412900 |
| C  | -0.53464700 | -5.47132200 | -1.33202100 |
| H  | 0.21567900  | -5.91381100 | -2.01093200 |
| H  | -0.36022100 | -5.88237000 | -0.32229900 |
| H  | -1.53276500 | -5.80369700 | -1.66868300 |
| C  | -4.38555500 | -2.10893500 | -1.07568200 |
| H  | -3.53529800 | -1.48321100 | -1.40162600 |

### TS1\_5exo\_MsO

|    |             |             |             |
|----|-------------|-------------|-------------|
| N  | -2.30473000 | -0.38624300 | -0.83948300 |
| C  | -2.84410300 | -1.54734800 | -1.29478500 |
| C  | 3.28636200  | 0.41063700  | 0.47461800  |
| C  | 4.17022300  | 2.02751400  | 1.80232900  |
| C  | 4.99062700  | 0.93406800  | 1.88166000  |
| H  | 4.22048800  | 3.00570200  | 2.27314000  |
| H  | 5.90877500  | 0.75670300  | 2.43543200  |
| N  | 4.43158600  | -0.04343100 | 1.06196900  |
| N  | 3.13611400  | 1.68630500  | 0.93692500  |
| Au | 2.02439300  | -0.55695100 | -0.76051600 |
| C  | 2.03535800  | 2.53682900  | 0.54743700  |
| C  | 2.15839500  | 3.28031700  | -0.64839400 |
| C  | 0.87063900  | 2.53730600  | 1.34817700  |
| C  | 1.04801200  | 4.05017400  | -1.04144000 |



|   |             |             |             |
|---|-------------|-------------|-------------|
| C | -0.20932200 | 3.32215100  | 0.90621500  |
| C | -0.12414200 | 4.06595100  | -0.27659500 |
| H | 1.10232400  | 4.63171900  | -1.96764100 |
| H | -1.14722700 | 3.33908300  | 1.46784100  |
| H | -0.99605600 | 4.64003200  | -0.60216200 |
| C | 4.98003000  | -1.35829900 | 0.83365700  |
| C | 5.90900800  | -1.51975300 | -0.21881300 |
| C | 4.54520600  | -2.42092300 | 1.65715200  |
| C | 6.41651800  | -2.81399200 | -0.43307500 |
| C | 5.08506300  | -3.69408300 | 1.39834500  |
| C | 6.01180500  | -3.88862000 | 0.36748300  |
| H | 7.13297300  | -2.98071100 | -1.24369800 |
| H | 4.76792000  | -4.54423400 | 2.01064400  |
| H | 6.41775000  | -4.88846200 | 0.18222800  |
| C | 0.73806600  | 1.68667800  | 2.60579000  |
| H | 1.73321600  | 1.27758100  | 2.85621900  |
| C | 0.26662700  | 2.51965600  | 3.81057400  |
| H | 0.24577600  | 1.89384700  | 4.72018500  |
| H | 0.93923500  | 3.37496400  | 3.99795600  |
| H | -0.75207300 | 2.91458100  | 3.65529500  |
| C | -0.21168700 | 0.49825400  | 2.35138000  |
| H | -1.22028500 | 0.84714800  | 2.06736900  |
| H | 0.16694800  | -0.14790300 | 1.53871300  |
| H | -0.30385300 | -0.12124000 | 3.26188200  |
| C | 3.50792000  | -2.22878300 | 2.75589400  |
| C | 4.02356100  | -2.71358400 | 4.12215700  |
| H | 4.95714400  | -2.19854300 | 4.40774100  |
| H | 3.26975800  | -2.51508700 | 4.90397800  |
| H | 4.22278500  | -3.79955700 | 4.11956000  |
| C | 6.31844100  | -0.36722600 | -1.12775200 |
| H | 5.90313600  | 0.56680700  | -0.71121600 |
| C | 3.41212800  | 3.23458200  | -1.51375600 |
| C | 4.01505700  | 4.63685100  | -1.71303300 |
| H | 3.32058100  | 5.30061300  | -2.25737100 |
| H | 4.25160500  | 5.11510200  | -0.74665200 |
| H | 4.94786000  | 4.57349400  | -2.30065000 |
| C | 5.71707800  | -0.55500000 | -2.53400500 |
| H | 4.61616400  | -0.63414300 | -2.49020100 |
| H | 5.97643300  | 0.30116000  | -3.18158500 |
| H | 6.10401300  | -1.47261800 | -3.01191800 |
| C | 7.84627600  | -0.19773700 | -1.19361100 |
| H | 8.10406200  | 0.67844000  | -1.81399000 |
| H | 8.27865500  | -0.04509700 | -0.18956100 |
| H | 8.33739500  | -1.07856400 | -1.64297100 |
| C | 2.18752400  | -2.92817000 | 2.37902500  |
| H | 1.80942100  | -2.56560500 | 1.40615300  |
| H | 2.32238800  | -4.02204400 | 2.30510200  |
| H | 1.41479300  | -2.73059000 | 3.14259900  |
| H | 3.29572500  | -1.14945900 | 2.84575200  |
| C | 3.11841300  | 2.55914800  | -2.86678600 |
| H | 4.04140800  | 2.47923500  | -3.46835200 |
| H | 2.71086500  | 1.54193600  | -2.72273400 |
| H | 2.38150700  | 3.13873100  | -3.45073100 |
| H | 4.16821000  | 2.61987300  | -0.99459700 |
| C | -4.10466400 | -2.05109200 | -0.68670500 |
| C | -4.80456100 | -1.37298900 | 0.33116000  |
| C | -4.62442500 | -3.27251300 | -1.17047200 |
| C | -5.99280400 | -1.89544300 | 0.85499600  |
| H | -4.43526300 | -0.42074000 | 0.72936600  |
| C | -5.80402100 | -3.80141500 | -0.65716000 |
| H | -4.07866800 | -3.79473500 | -1.96159700 |
| C | -6.50029500 | -3.11532200 | 0.36293600  |
| H | -6.51321400 | -1.34757100 | 1.64395200  |

|   |             |             |             |
|---|-------------|-------------|-------------|
| H | -6.21229200 | -4.74648900 | -1.02781300 |
| O | -7.64387200 | -3.71146300 | 0.80127100  |
| C | -8.38837000 | -3.04406800 | 1.82641300  |
| H | -8.73729300 | -2.05013900 | 1.49105000  |
| H | -9.25780300 | -3.68751800 | 2.02594600  |
| H | -7.79414800 | -2.93401700 | 2.75198600  |
| O | -2.25348600 | -2.17518900 | -2.21435700 |
| C | -1.18248600 | 0.11968300  | -1.60491800 |
| C | -0.20252300 | -0.94364100 | -1.85677300 |
| C | 0.79376500  | -1.69981100 | -2.02923100 |
| H | 1.09310600  | -2.64743800 | -2.46866100 |
| H | -2.76365100 | 0.28170000  | -0.17757700 |
| H | -1.50585900 | 0.53371300  | -2.58157700 |
| H | -0.72032200 | 0.94996600  | -1.04618400 |
| O | -3.35605500 | 1.49015800  | 0.91356900  |
| S | -3.72598800 | 2.72273100  | 0.08278900  |
| O | -3.18779900 | 2.64579500  | -1.31627500 |
| O | -3.43867300 | 4.00161200  | 0.80980500  |
| C | -5.52980300 | 2.63112500  | -0.06893300 |
| H | -5.80397500 | 1.69537800  | -0.58081300 |
| H | -5.97831300 | 2.65477300  | 0.93627900  |
| H | -5.88167600 | 3.49461700  | -0.65467800 |

### TS1\_gendo\_MsO

|    |             |             |             |
|----|-------------|-------------|-------------|
| N  | -2.43926800 | 0.25937000  | -2.62293300 |
| C  | -3.03563700 | -0.96363200 | -2.59265000 |
| C  | 2.89944100  | -0.02756300 | 0.55249200  |
| C  | 4.52498100  | 1.01802500  | 1.74913500  |
| C  | 4.74809300  | -0.32905100 | 1.84431300  |
| H  | 5.05833400  | 1.86854100  | 2.16510000  |
| H  | 5.51319800  | -0.90146300 | 2.36200400  |
| N  | 3.74531000  | -0.94910500 | 1.10403000  |
| N  | 3.39123700  | 1.18061600  | 0.95811800  |
| Au | 1.32576800  | -0.38581900 | -0.66314300 |
| C  | 2.73663300  | 2.43769400  | 0.67986900  |
| C  | 3.00708900  | 3.08724000  | -0.54440900 |
| C  | 1.82375600  | 2.93239500  | 1.63885900  |
| C  | 2.31139600  | 4.28261100  | -0.80122500 |
| C  | 1.16110500  | 4.13330800  | 1.33250500  |
| C  | 1.39676200  | 4.79753600  | 0.12413100  |
| H  | 2.48221400  | 4.81009000  | -1.74542600 |
| H  | 0.42324100  | 4.53349100  | 2.03270900  |
| H  | 0.84936200  | 5.71757200  | -0.10355700 |
| C  | 3.54247000  | -2.37300900 | 0.99336400  |
| C  | 4.20482400  | -3.07352200 | -0.03844900 |
| C  | 2.65933100  | -2.98850200 | 1.90952800  |
| C  | 3.95424500  | -4.45411100 | -0.13964800 |
| C  | 2.44328400  | -4.37077900 | 1.76141600  |
| C  | 3.08296600  | -5.09556900 | 0.74896400  |
| H  | 4.44318200  | -5.03044600 | -0.93122900 |
| H  | 1.76036100  | -4.88199800 | 2.44788600  |
| H  | 2.89888200  | -6.17035600 | 0.64989600  |
| C  | 1.54825400  | 2.21313000  | 2.95409800  |
| H  | 2.08212200  | 1.24669000  | 2.93704400  |
| C  | 2.09927000  | 3.02444400  | 4.14222500  |
| H  | 1.92719300  | 2.48454100  | 5.09047000  |
| H  | 3.18420800  | 3.20660200  | 4.04467800  |
| H  | 1.59843000  | 4.00610000  | 4.21710800  |
| C  | 0.05083200  | 1.90447800  | 3.13860100  |
| H  | -0.54118800 | 2.83060800  | 3.24428700  |
| H  | -0.35260400 | 1.35399700  | 2.27322600  |
| H  | -0.09738800 | 1.30412600  | 4.05445400  |
| C  | 1.93991100  | -2.20687500 | 3.00200700  |

|   |              |             |             |    |             |             |             |
|---|--------------|-------------|-------------|----|-------------|-------------|-------------|
| C | 2.23345200   | -2.78473900 | 4.39790500  | C  | 3.50749700  | -1.49724400 | -0.19027400 |
| H | 3.31694200   | -2.79816900 | 4.60925400  | C  | -3.20360300 | 0.36836300  | 0.10097000  |
| H | 1.74040100   | -2.17314100 | 5.17379400  | C  | -4.35939800 | 2.31762200  | 0.38439700  |
| H | 1.85641400   | -3.81784700 | 4.49787000  | C  | -5.25028100 | 1.36937300  | -0.04035000 |
| C | 5.11089800   | -2.37070800 | -1.04120100 | H  | -4.48697200 | 3.36751300  | 0.63472200  |
| H | 5.29545400   | -1.34555600 | -0.67599600 | H  | -6.31745700 | 1.41793900  | -0.24037900 |
| C | 3.98786800   | 2.52785100  | -1.56701200 | N  | -4.52579800 | 0.19095700  | -0.20553500 |
| C | 5.09561200   | 3.54308100  | -1.90148100 | N  | -3.12052500 | 1.68836100  | 0.46178700  |
| H | 4.68405100   | 4.44875400  | -2.38050100 | Au | -1.63304900 | -0.92236600 | 0.00769200  |
| H | 5.63939200   | 3.85850700  | -0.99386000 | C  | -1.88093900 | 2.30538800  | 0.87048100  |
| H | 5.82502900   | 3.09819500  | -2.60135600 | C  | -1.52435900 | 2.24593400  | 2.23648600  |
| C | 4.40705400   | -2.25409300 | -2.40763400 | C  | -1.05639800 | 2.88377600  | -0.12030700 |
| H | 3.44252400   | -1.72357700 | -2.31278900 | C  | -0.28191500 | 2.79511500  | 2.60241800  |
| H | 5.03874800   | -1.69620900 | -3.12172600 | C  | 0.18287700  | 3.40525500  | 0.29567600  |
| H | 4.20587600   | -3.25204400 | -2.83668200 | C  | 0.56507000  | 3.36078200  | 1.64171500  |
| C | 6.47667400   | -3.06566300 | -1.17350200 | H  | 0.03015300  | 2.76052500  | 3.65138300  |
| H | 7.13356400   | -2.48805700 | -1.84714400 | H  | 0.87446700  | 3.80740200  | -0.44958200 |
| H | 6.98087100   | -3.15283300 | -0.19532800 | H  | 1.53756200  | 3.76439100  | 1.94420400  |
| H | 6.37965800   | -4.08100900 | -1.59655700 | C  | -5.07200400 | -1.06460100 | -0.65731800 |
| C | 0.42552900   | -2.14956700 | 2.72600600  | C  | -5.57472500 | -1.96446500 | 0.30872300  |
| H | 0.21866800   | -1.69436600 | 1.74093900  | C  | -5.04624600 | -1.34765400 | -2.04076100 |
| H | -0.02140500  | -3.15992500 | 2.73714800  | C  | -6.06819600 | -3.19688600 | -0.15596600 |
| H | -0.08338000  | -1.54360900 | 3.49610100  | C  | -5.55387900 | -2.59359800 | -2.45216700 |
| H | 2.31597000   | -1.16936200 | 2.98972600  | C  | -6.05845800 | -3.50857600 | -1.52091000 |
| C | 3.25193200   | 2.06703000  | -2.83928900 | H  | -6.45638500 | -3.92434500 | 0.56384100  |
| H | 3.96056400   | 1.61019200  | -3.55311200 | H  | -5.54270300 | -2.85082700 | -3.51639700 |
| H | 2.47639500   | 1.31752500  | -2.59489000 | H  | -6.44336600 | -4.47554100 | -1.86125900 |
| H | 2.75644700   | 2.91490000  | -3.34481600 | C  | -1.45257200 | 2.92295500  | -1.59101200 |
| H | 4.47619400   | 1.64125000  | -1.12589200 | H  | -2.48680500 | 2.54615600  | -1.67778700 |
| C | -4.46574900  | -1.03627900 | -2.16815600 | C  | -1.43855000 | 4.36194700  | -2.13827100 |
| C | -5.24707700  | 0.08482500  | -1.82210900 | H  | -1.79600300 | 4.37520800  | -3.18308100 |
| C | -5.06111900  | -2.31633500 | -2.10783200 | H  | -2.09010300 | 5.02649200  | -1.54386900 |
| C | -6.57963200  | -0.06271000 | -1.41860500 | H  | -0.41976600 | 4.78741900  | -2.12942500 |
| H | -4.82479300  | 1.09490000  | -1.83926600 | C  | -0.54874100 | 1.99966100  | -2.43043400 |
| C | -6.38516400  | -2.47596400 | -1.71220600 | H  | 0.50879000  | 2.31265500  | -2.37750800 |
| H | -4.45275300  | -3.18403600 | -2.37800600 | H  | -0.61873200 | 0.95588300  | -2.07411600 |
| C | -7.15821200  | -1.34673000 | -1.36179100 | H  | -0.86019400 | 2.02036500  | -3.49034400 |
| H | -7.15597400  | 0.82619200  | -1.15260600 | C  | -4.46108900 | -0.37594900 | -3.05695900 |
| H | -6.84875800  | -3.46590200 | -1.66274200 | C  | -5.47417400 | -0.02417000 | -4.16036500 |
| O | -8.44185300  | -1.60214100 | -0.98335700 | H  | -6.40022000 | 0.40195600  | -3.73622600 |
| C | -9.25503200  | -0.48498500 | -0.60756500 | H  | -5.04090300 | 0.71874800  | -4.85301400 |
| H | -9.38638900  | 0.22019400  | -1.44873900 | H  | -5.75220700 | -0.91164900 | -4.75589800 |
| H | -10.23153600 | -0.90903200 | -0.33166300 | C  | -5.54397200 | -1.64763500 | 1.79831500  |
| H | -8.83013000  | 0.05069000  | 0.26106400  | H  | -5.29992200 | -0.57705900 | 1.91437500  |
| O | -2.40956100  | -2.01662700 | -2.90691000 | C  | -2.40849600 | 1.57448800  | 3.27991600  |
| C | -1.01536600  | 0.40095800  | -2.85663000 | C  | -2.75279400 | 2.52640900  | 4.43869700  |
| C | -0.24836500  | -0.58796700 | -2.01731400 | H  | -1.84931200 | 2.83500100  | 4.99359300  |
| C | -0.41862000  | -1.81268600 | -1.75267000 | H  | -3.25480700 | 3.43977600  | 4.07467100  |
| H | -0.38897700  | -2.83828900 | -1.41632000 | H  | -3.42908600 | 2.02677700  | 5.15455800  |
| H | -2.85763800  | 1.07355000  | -2.11489800 | C  | -4.42871700 | -2.45297200 | 2.49333400  |
| H | -0.76717800  | 0.18623400  | -3.91267100 | H  | -3.44689800 | -2.25559900 | 2.02708100  |
| H | -0.73800900  | 1.43570500  | -2.62246800 | H  | -4.36578300 | -2.18310400 | 3.56272900  |
| O | -3.19912000  | 2.55938900  | -1.26020500 | H  | -4.62516700 | -3.53813100 | 2.42609900  |
| S | -2.45920500  | 2.49896800  | 0.07449400  | C  | -6.90632600 | -1.88406400 | 2.47227100  |
| O | -2.17095300  | 3.85473400  | 0.63776300  | H  | -6.86318100 | -1.57580800 | 3.53167100  |
| O | -1.28432500  | 1.56002300  | 0.01495900  | H  | -7.70658700 | -1.30496700 | 1.97933800  |
| C | -3.62693600  | 1.71461100  | 1.21772100  | H  | -7.19608800 | -2.94941900 | 2.44920000  |
| H | -4.54407900  | 2.32117400  | 1.27941600  | C  | -3.15514900 | -0.93748800 | -3.65061000 |
| H | -3.87114600  | 0.70560300  | 0.85100100  | H  | -2.42344900 | -1.16183800 | -2.85365900 |
| H | -3.15713800  | 1.64510100  | 2.21152600  | H  | -3.34136400 | -1.86888700 | -4.21504800 |
|   |              |             |             | H  | -2.69950200 | -0.20648100 | -4.34177400 |
|   |              |             |             | H  | -4.20841400 | 0.56017900  | -2.53025400 |
|   |              |             |             | C  | -1.74709000 | 0.28175400  | 3.79437800  |

### Int2\_5exo\_MsO

N 3.16858500 -0.23688800 -0.01582800

|   |             |             |             |   |             |             |             |
|---|-------------|-------------|-------------|---|-------------|-------------|-------------|
| H | -2.41968200 | -0.24514000 | 4.49459300  | H | -5.14443700 | 4.07662800  | 2.56028600  |
| H | -1.51347500 | -0.40103500 | 2.95784700  | H | -6.45851400 | 4.84430600  | 0.59302100  |
| H | -0.80471800 | 0.50131500  | 4.32783200  | C | -1.32818600 | -2.09606000 | 2.66852200  |
| H | -3.35764200 | 1.28851700  | 2.79478500  | H | -2.34581500 | -1.67776200 | 2.76730000  |
| C | 4.83962900  | -2.03777500 | -0.36507200 | C | -1.15287000 | -3.15791800 | 3.77053000  |
| C | 5.96768700  | -1.18663300 | -0.40278100 | H | -1.29416700 | -2.70395500 | 4.76746600  |
| C | 5.01656700  | -3.43603000 | -0.51352600 | H | -1.88312900 | -3.97900500 | 3.66048300  |
| C | 7.24540400  | -1.71517000 | -0.57911100 | H | -0.14087700 | -3.59842000 | 3.74247900  |
| H | 5.84799000  | -0.10081600 | -0.30968800 | C | -0.32710200 | -0.93920900 | 2.84802800  |
| C | 6.28695800  | -3.96539700 | -0.69075800 | H | 0.71571500  | -1.27689600 | 2.71967500  |
| H | 4.14723000  | -4.09826400 | -0.49021200 | H | -0.51102900 | -0.14236300 | 2.10490300  |
| C | 7.41433900  | -3.11052600 | -0.72431800 | H | -0.42803100 | -0.50004300 | 3.85717800  |
| H | 8.10187100  | -1.03873900 | -0.60927300 | C | -4.04528900 | 1.61123600  | 3.01775100  |
| H | 6.44077600  | -5.04178000 | -0.80737600 | C | -4.77653100 | 1.84016700  | 4.35191800  |
| O | 8.60780700  | -3.72523400 | -0.90293800 | H | -5.74852600 | 1.31721900  | 4.37483100  |
| C | 9.78790500  | -2.90735000 | -0.92700300 | H | -4.16423600 | 1.46121100  | 5.18903600  |
| H | 9.92660000  | -2.37997400 | 0.03348800  | H | -4.96416000 | 2.91281400  | 4.53603100  |
| H | 10.62343700 | -3.60294800 | -1.08858900 | C | -6.12422800 | 0.67889700  | -1.58312800 |
| H | 9.75211400  | -2.17575600 | -1.75357000 | H | -5.90117400 | -0.35226200 | -1.25799400 |
| O | 2.45636900  | -2.32586900 | -0.20674000 | C | -3.26445500 | -3.18881300 | -1.97643500 |
| C | 1.71543200  | -0.09450000 | 0.06543200  | C | -3.72331800 | -4.58387100 | -2.43743400 |
| C | 1.24931200  | -1.52951100 | -0.07370500 | H | -2.90672300 | -5.13262800 | -2.93891000 |
| C | 0.03169700  | -2.08683100 | -0.10501700 | H | -4.06826600 | -5.19695500 | -1.58649900 |
| H | 0.00893100  | -3.18023100 | -0.22653500 | H | -4.55636100 | -4.49510000 | -3.15729300 |
| H | 3.82824200  | 0.60592400  | -0.04074600 | C | -5.13343000 | 1.03456400  | -2.71024000 |
| H | 1.42349500  | 0.36471400  | 1.02667400  | H | -4.08955900 | 0.99460400  | -2.35084800 |
| H | 1.36472200  | 0.56726700  | -0.74354800 | H | -5.23762400 | 0.32943900  | -3.55414200 |
| O | 4.78872500  | 1.88819100  | -0.06166900 | H | -5.32184700 | 2.05472800  | -3.09077100 |
| S | 4.23829300  | 2.88558000  | -1.09272700 | C | -7.57467000 | 0.69686200  | -2.09203500 |
| O | 2.82041600  | 2.55643800  | -1.46857700 | H | -7.69805300 | -0.03829300 | -2.90646300 |
| O | 5.16928400  | 3.11061000  | -2.23826600 | H | -8.28898300 | 0.44136600  | -1.29013600 |
| C | 4.16753200  | 4.43964400  | -0.16828700 | H | -7.85706200 | 1.68489200  | -2.49590500 |
| H | 3.52086300  | 4.30455400  | 0.71239300  | C | -2.67294300 | 2.31153500  | 3.00350600  |
| H | 5.18311700  | 4.71792600  | 0.15260400  | H | -2.13518300 | 2.10414700  | 2.06038900  |
| H | 3.75417300  | 5.22367300  | -0.82176700 | H | -2.78239900 | 3.40655800  | 3.10191600  |

### Int2\_gendo\_MsO

|    |             |             |             |   |             |             |             |
|----|-------------|-------------|-------------|---|-------------|-------------|-------------|
| N  | 2.39933800  | 0.62523600  | -1.14739100 | H | -2.04947900 | 1.95421200  | 3.84201000  |
| C  | 2.68009400  | 1.89847300  | -1.29696300 | H | -3.86082000 | 0.52734400  | 2.92260600  |
| C  | -3.45501600 | -0.54856000 | 0.37723800  | C | -2.83268600 | -2.32084500 | -3.17387200 |
| C  | -4.60788600 | -2.33882800 | 1.19785500  | H | -3.66295900 | -2.21563000 | -3.89493400 |
| C  | -5.41909300 | -1.24074100 | 1.30506200  | H | -2.52889500 | -1.31180200 | -2.84333600 |
| H  | -4.76306300 | -3.38039700 | 1.46730600  | H | -1.97766800 | -2.77476500 | -3.70584800 |
| H  | -6.42922500 | -1.12346500 | 1.68859800  | H | -4.13117800 | -2.69305800 | -1.50521200 |
| N  | -4.69623200 | -0.16087900 | 0.79951100  | C | 4.04033000  | 2.43500400  | -1.32561900 |
| N  | -3.41848300 | -1.89544600 | 0.63104500  | C | 5.17283700  | 1.59293300  | -1.25369500 |
| Au | -1.83524900 | 0.44666500  | -0.34583100 | C | 4.23309900  | 3.83598200  | -1.41826900 |
| C  | -2.24548700 | -2.68550400 | 0.33259000  | C | 6.46074000  | 2.12892400  | -1.27112300 |
| C  | -2.14555600 | -3.27874900 | -0.94582100 | H | 5.06045500  | 0.50567100  | -1.17376600 |
| C  | -1.20389800 | -2.72847600 | 1.28769100  | C | 5.51264200  | 4.37452900  | -1.43983700 |
| C  | -0.93583400 | -3.92278700 | -1.26511300 | H | 3.36542200  | 4.49761400  | -1.46978800 |
| C  | -0.00941100 | -3.36738300 | 0.90860700  | C | 6.64126300  | 3.52605500  | -1.36622300 |
| C  | 0.12853300  | -3.94937900 | -0.35676300 | H | 7.31838900  | 1.45563200  | -1.21092300 |
| H  | -0.81936800 | -4.38091400 | -2.25299200 | H | 5.67043000  | 5.45437300  | -1.51078600 |
| H  | 0.84363400  | -3.37746000 | 1.59241600  | O | 7.84586400  | 4.14727800  | -1.39229200 |
| H  | 1.08750200  | -4.39929400 | -0.63069400 | C | 9.02416800  | 3.33000000  | -1.33219700 |
| C  | -5.17508500 | 1.19802900  | 0.74441900  | H | 9.07876300  | 2.64022100  | -2.19358200 |
| C  | -5.90485300 | 1.60632600  | -0.39456900 | H | 9.86925100  | 4.03202700  | -1.36982400 |
| C  | -4.87998700 | 2.05863100  | 1.82499000  | H | 9.06540200  | 2.75478700  | -0.38979700 |
| C  | -6.36168300 | 2.93608900  | -0.42317300 | O | 1.71122700  | 2.80968500  | -1.42178200 |
| C  | -5.35845700 | 3.37937000  | 1.74400000  | C | 1.03341500  | 0.07009500  | -1.13370600 |
| C  | -6.09541000 | 3.81219800  | 0.63600100  | C | -0.01991800 | 1.14067800  | -0.95577700 |
| H  | -6.92568700 | 3.29094900  | -1.29141000 | C | 0.36300700  | 2.41398200  | -1.12269400 |
|    |             |             |             | H | -0.23992600 | 3.31925900  | -1.04706600 |
|    |             |             |             | H | 3.15942300  | -0.09850000 | -0.98768600 |

|   |            |             |             |
|---|------------|-------------|-------------|
| H | 0.87372100 | -0.49611700 | -2.07224200 |
| H | 1.01375100 | -0.66572600 | -0.31268600 |
| O | 4.11094700 | -1.44843000 | -0.80368600 |
| S | 3.80580800 | -2.10918500 | 0.54613400  |
| O | 3.42588400 | -3.55055900 | 0.40488600  |
| O | 2.87308200 | -1.27371700 | 1.37459000  |
| C | 5.39504400 | -2.08635300 | 1.41348300  |
| H | 5.26459400 | -2.54688800 | 2.40511800  |
| H | 6.13561900 | -2.65623700 | 0.83135200  |
| H | 5.72655200 | -1.04235000 | 1.52642000  |

### TS2\_5exo\_MsO

|    |             |             |             |
|----|-------------|-------------|-------------|
| N  | 3.37292300  | -0.17136000 | -3.36141200 |
| C  | 3.27518600  | 0.19334900  | -2.12775600 |
| C  | -2.25252800 | 0.76001400  | 0.70094200  |
| C  | -4.01708700 | 1.42533700  | 1.98326900  |
| C  | -2.94418100 | 2.20022900  | 2.32748800  |
| H  | -5.04524300 | 1.41855300  | 2.33472800  |
| H  | -2.84244900 | 3.01082700  | 3.04337900  |
| N  | -1.87539600 | 1.77524900  | 1.54088300  |
| N  | -3.57373900 | 0.55147500  | 0.99270000  |
| Au | -1.12835900 | -0.21444100 | -0.65265400 |
| C  | -4.41606700 | -0.37594000 | 0.27555100  |
| C  | -5.16457300 | 0.12313300  | -0.81325600 |
| C  | -4.44434000 | -1.73149800 | 0.68102700  |
| C  | -5.99420100 | -0.78436000 | -1.49773000 |
| C  | -5.29172700 | -2.59331900 | -0.03783300 |
| C  | -6.06206900 | -2.12619000 | -1.11045700 |
| H  | -6.58209400 | -0.43348900 | -2.35203500 |
| H  | -5.34038600 | -3.65004800 | 0.23929800  |
| H  | -6.71159500 | -2.81920400 | -1.65553400 |
| C  | -0.56696400 | 2.38711900  | 1.53372300  |
| C  | -0.30738600 | 3.38762000  | 0.56979400  |
| C  | 0.39179500  | 1.95853700  | 2.48183300  |
| C  | 0.96883300  | 3.98046700  | 0.58102000  |
| C  | 1.64567500  | 2.59467600  | 2.45493300  |
| C  | 1.93372900  | 3.59200600  | 1.51514900  |
| H  | 1.20675600  | 4.75145600  | -0.15910200 |
| H  | 2.41395900  | 2.29298300  | 3.17261800  |
| H  | 2.92421900  | 4.05813400  | 1.50369300  |
| C  | -3.60787600 | -2.23086800 | 1.85344800  |
| H  | -2.68036700 | -1.63348600 | 1.88166100  |
| C  | -4.35450800 | -2.00945500 | 3.18470900  |
| H  | -3.72913300 | -2.34215000 | 4.03211200  |
| H  | -4.60232000 | -0.94624100 | 3.34560700  |
| H  | -5.29743100 | -2.58575300 | 3.20761300  |
| C  | -3.18039400 | -3.69893000 | 1.71202800  |
| H  | -4.03550300 | -4.39253700 | 1.80588500  |
| H  | -2.68316200 | -3.88208700 | 0.74473000  |
| H  | -2.45715800 | -3.94565000 | 2.50611000  |
| C  | 0.08015800  | 0.87755400  | 3.50932700  |
| C  | -0.43495600 | 1.51047000  | 4.81843700  |
| H  | -1.33020400 | 2.13387700  | 4.65401500  |
| H  | -0.69772500 | 0.72333100  | 5.54741100  |
| H  | 0.34248300  | 2.15106000  | 5.27335200  |
| C  | -1.33892200 | 3.81944300  | -0.46517100 |
| H  | -2.27133700 | 3.25921500  | -0.28031500 |
| C  | -5.04723700 | 1.56644400  | -1.28811900 |
| C  | -6.41800300 | 2.25556900  | -1.39582600 |
| H  | -7.05721000 | 1.77861500  | -2.15963600 |
| H  | -6.95995600 | 2.22482400  | -0.43441600 |
| H  | -6.29073700 | 3.31412600  | -1.68370500 |
| C  | -0.86778200 | 3.46477600  | -1.88733300 |
| H  | -0.68035100 | 2.37963700  | -1.97530900 |

|   |             |             |             |
|---|-------------|-------------|-------------|
| H | -1.63656700 | 3.74592500  | -2.62882300 |
| H | 0.06521600  | 3.99631500  | -2.14634000 |
| C | -1.67155800 | 5.31737900  | -0.34183700 |
| H | -2.45656900 | 5.59443500  | -1.06779300 |
| H | -2.03738400 | 5.56725200  | 0.66949900  |
| H | -0.78840100 | 5.94819800  | -0.54698500 |
| C | 1.27880300  | -0.04055100 | 3.79588000  |
| H | 1.68453800  | -0.47878900 | 2.86996900  |
| H | 2.08777200  | 0.49391500  | 4.32625700  |
| H | 0.95667900  | -0.87282600 | 4.44498700  |
| H | -0.72260200 | 0.24270700  | 3.09497000  |
| C | -4.28158900 | 1.62192000  | -2.62464000 |
| H | -4.14350200 | 2.66881200  | -2.94927100 |
| H | -3.28623600 | 1.15341600  | -2.52816600 |
| H | -4.83252600 | 1.08899800  | -3.42031300 |
| H | -4.45472700 | 2.12858700  | -0.54579600 |
| C | 4.26772600  | 0.84647500  | -1.28299700 |
| C | 5.45258800  | 1.35398900  | -1.85198500 |
| C | 4.06520700  | 0.96193900  | 0.11206500  |
| C | 6.42155300  | 1.97138000  | -1.05803900 |
| H | 5.60725400  | 1.26324600  | -2.93129700 |
| C | 5.02899400  | 1.57170700  | 0.90984600  |
| H | 3.15970700  | 0.54926700  | 0.56370400  |
| C | 6.21276400  | 2.08311800  | 0.33405300  |
| H | 7.32885100  | 2.36190300  | -1.52381900 |
| H | 4.89160800  | 1.65707800  | 1.99172500  |
| O | 7.08829500  | 2.66067200  | 1.20213500  |
| C | 8.31909700  | 3.16393500  | 0.66993400  |
| H | 8.14314100  | 3.97729000  | -0.05777000 |
| H | 8.87333000  | 3.56151300  | 1.53251000  |
| H | 8.91097100  | 2.36136700  | 0.19292700  |
| O | 2.04946700  | -0.07432000 | -1.50106800 |
| C | 2.08758900  | -0.79205900 | -3.69232000 |
| C | 1.26521000  | -0.72468700 | -2.42138200 |
| C | 0.03031900  | -1.20788100 | -2.07719300 |
| H | -0.47412100 | -1.71126800 | -2.91752900 |
| H | 0.23086800  | -2.17018400 | -1.09408500 |
| H | 1.59333800  | -0.25744300 | -4.52613200 |
| H | 2.22955500  | -1.83666600 | -4.02837000 |
| O | 0.39517400  | -3.23109600 | -0.40548400 |
| S | 0.99276400  | -2.92190600 | 1.01728100  |
| O | -0.06758700 | -2.58982200 | 2.01314800  |
| O | 2.14385100  | -1.97692100 | 0.92877200  |
| C | 1.63990000  | -4.54857000 | 1.45608100  |
| H | 2.07531800  | -4.47537000 | 2.46482400  |
| H | 0.81484900  | -5.27681500 | 1.45322200  |
| H | 2.41213400  | -4.83874900 | 0.72852000  |

### TS2\_6endo\_MsO

|    |             |             |             |
|----|-------------|-------------|-------------|
| N  | -1.86379000 | 0.13406700  | -2.93325200 |
| C  | -2.98095800 | -0.11666800 | -2.36008800 |
| C  | 1.04748800  | 0.81691800  | 1.50369200  |
| C  | 1.31436100  | 2.80001400  | 2.59862400  |
| C  | 2.10292000  | 1.87415700  | 3.22540900  |
| H  | 1.14531100  | 3.85616300  | 2.79146800  |
| H  | 2.76627400  | 1.95061200  | 4.08283300  |
| N  | 1.92635400  | 0.67249400  | 2.54202200  |
| N  | 0.67981600  | 2.13583000  | 1.55434500  |
| Au | 0.26046900  | -0.48040700 | 0.17358300  |
| C  | -0.22483300 | 2.74377100  | 0.60677900  |
| C  | 0.31616200  | 3.26541700  | -0.58991600 |
| C  | -1.60498400 | 2.76497100  | 0.90673900  |
| C  | -0.58496500 | 3.83683300  | -1.50621100 |

|   |             |             |             |
|---|-------------|-------------|-------------|
| C | -2.46105200 | 3.35159200  | -0.04261900 |
| C | -1.95689400 | 3.88313200  | -1.23464700 |
| H | -0.20531100 | 4.23860100  | -2.45094100 |
| H | -3.53914400 | 3.37365800  | 0.14711800  |
| H | -2.64352900 | 4.32201600  | -1.96496500 |
| C | 2.62670100  | -0.54684100 | 2.85987500  |
| C | 3.92976600  | -0.71769500 | 2.34074000  |
| C | 1.98793700  | -1.50220400 | 3.68185600  |
| C | 4.61450400  | -1.89336600 | 2.69765300  |
| C | 2.70948600  | -2.67085700 | 3.98793400  |
| C | 4.01230800  | -2.86003600 | 3.51159500  |
| H | 5.62856900  | -2.05668400 | 2.31860000  |
| H | 2.24369900  | -3.43975300 | 4.61246000  |
| H | 4.55948200  | -3.77289600 | 3.76876600  |
| C | -2.17262600 | 2.16203300  | 2.18465300  |
| H | -1.33636900 | 1.73596400  | 2.76596900  |
| C | -2.84327400 | 3.23796600  | 3.05774100  |
| H | -3.21631700 | 2.79454900  | 3.99794000  |
| H | -2.13442800 | 4.04393300  | 3.31678300  |
| H | -3.70249700 | 3.69897700  | 2.53897000  |
| C | -3.14507700 | 1.01139000  | 1.86520400  |
| H | -4.02465400 | 1.37017400  | 1.30215400  |
| H | -2.64963200 | 0.23443000  | 1.25711400  |
| H | -3.50567600 | 0.54359800  | 2.79885400  |
| C | 0.56854100  | -1.30979700 | 4.20052800  |
| C | 0.48767800  | -1.45619200 | 5.73001700  |
| H | 1.17158800  | -0.75492700 | 6.23896400  |
| H | -0.53948200 | -1.24508400 | 6.07600200  |
| H | 0.74443300  | -2.47890900 | 6.05779400  |
| C | 4.58253700  | 0.30138500  | 1.41509500  |
| H | 3.85758400  | 1.11232700  | 1.22889200  |
| C | 1.80106200  | 3.17452500  | -0.91831400 |
| C | 2.39601200  | 4.54351000  | -1.29098300 |
| H | 1.94803100  | 4.94606100  | -2.21654700 |
| H | 2.23810700  | 5.28472000  | -0.48793800 |
| H | 3.48294200  | 4.45164400  | -1.46306200 |
| C | 4.92561300  | -0.32597700 | 0.05129000  |
| H | 4.03431900  | -0.74968900 | -0.44197000 |
| H | 5.35342800  | 0.44016700  | -0.61962900 |
| H | 5.67429200  | -1.13221500 | 0.15324500  |
| C | 5.82492500  | 0.93147400  | 2.07110800  |
| H | 6.26435600  | 1.69459400  | 1.40480800  |
| H | 5.57366600  | 1.41829300  | 3.02984700  |
| H | 6.60217100  | 0.17265800  | 2.27170400  |
| C | -0.39993000 | -2.27736900 | 3.49395500  |
| H | -0.36897100 | -2.13097000 | 2.39827200  |
| H | -0.14222300 | -3.33005400 | 3.70780000  |
| H | -1.43603300 | -2.10217600 | 3.83507500  |
| H | 0.24912900  | -0.28317900 | 3.95015700  |
| C | 2.03729900  | 2.13619500  | -2.03215500 |
| H | 3.11598900  | 2.03625800  | -2.24773700 |
| H | 1.65413400  | 1.14411300  | -1.73261600 |
| H | 1.52541100  | 2.43000200  | -2.96576400 |
| H | 2.33201700  | 2.81895000  | -0.01777000 |
| C | -4.15332500 | 0.77043400  | -2.42023000 |
| C | -4.13933200 | 1.87832100  | -3.29100600 |
| C | -5.27662500 | 0.58138200  | -1.58357800 |
| C | -5.20222100 | 2.78450300  | -3.32921900 |
| H | -3.26872100 | 2.02573100  | -3.93596700 |
| C | -6.34178400 | 1.47961800  | -1.61052100 |
| H | -5.30488100 | -0.27117100 | -0.90072700 |
| C | -6.31314600 | 2.59130400  | -2.47994400 |
| H | -5.16151400 | 3.63186500  | -4.01782200 |

|   |             |             |             |
|---|-------------|-------------|-------------|
| H | -7.21233100 | 1.34268800  | -0.96208800 |
| O | -7.39866700 | 3.41339600  | -2.42686600 |
| C | -7.39667400 | 4.56236600  | -3.28056300 |
| H | -7.35066800 | 4.27458600  | -4.34698000 |
| H | -8.34665000 | 5.08083700  | -3.08541500 |
| H | -6.55504900 | 5.23948100  | -3.04455300 |
| O | -3.20926700 | -1.24088800 | -1.53193400 |
| C | -0.79556000 | -0.85949400 | -2.74812400 |
| C | -0.81145700 | -1.46498800 | -1.34472600 |
| C | -2.07876400 | -1.68302100 | -0.87978100 |
| H | -2.35068200 | -2.19523800 | 0.04958700  |
| H | 0.02415300  | -2.65186400 | -1.26647500 |
| H | -0.93111800 | -1.66900500 | -3.49637900 |
| H | 0.16987200  | -0.38226800 | -2.97722100 |
| O | 0.54882100  | -3.70830200 | -1.39771700 |
| S | 2.12985800  | -3.58193700 | -1.40327700 |
| O | 2.55285300  | -2.29801100 | -2.02980400 |
| O | 2.70223900  | -4.84094100 | -1.93971900 |
| C | 2.52856000  | -3.49175900 | 0.34664900  |
| H | 2.15171300  | -4.39571400 | 0.84816900  |
| H | 3.62091900  | -3.42596300 | 0.45282600  |
| H | 2.04830000  | -2.59231200 | 0.76594600  |

### TfOH

|   |             |             |             |
|---|-------------|-------------|-------------|
| O | -1.47255400 | 2.33957900  | 0.12667500  |
| S | -0.05156800 | 1.95766400  | 0.09479000  |
| O | 0.87921800  | 2.39498700  | 1.14697400  |
| O | 0.58562800  | 2.23183600  | -1.40014500 |
| C | 0.06099600  | 0.09050500  | -0.05067300 |
| H | 0.53443500  | 3.20580100  | -1.58586100 |
| F | -0.40423100 | -0.41915000 | 1.09921000  |
| F | 1.33591200  | -0.27625200 | -0.23049500 |
| F | -0.68870000 | -0.33484000 | -1.07451400 |

### IPrAuOTf

|    |             |             |             |
|----|-------------|-------------|-------------|
| C  | 1.80077700  | -0.01835400 | 0.16485100  |
| C  | 3.93658500  | 0.59072900  | 0.64819300  |
| C  | 3.88958300  | -0.77703500 | 0.63909100  |
| H  | 4.75241900  | 1.28448600  | 0.83242100  |
| H  | 4.65537600  | -1.52835100 | 0.81185500  |
| N  | 2.57677500  | -1.12944500 | 0.34038200  |
| N  | 2.65139000  | 1.03580800  | 0.35470400  |
| Au | -0.12217500 | 0.06768300  | -0.20795800 |
| C  | 2.23801700  | 2.41795300  | 0.30261900  |
| C  | 2.30569000  | 3.09402600  | -0.93556800 |
| C  | 1.75999600  | 3.01457600  | 1.49047000  |
| C  | 1.88062200  | 4.43461000  | -0.95734900 |
| C  | 1.35004300  | 4.35792800  | 1.41176700  |
| C  | 1.41033200  | 5.06051200  | 0.20302400  |
| H  | 1.90870400  | 4.99005900  | -1.89987300 |
| H  | 0.96927000  | 4.85386400  | 2.31032200  |
| H  | 1.08095000  | 6.10389100  | 0.16307300  |
| C  | 2.07970400  | -2.48227600 | 0.26601900  |
| C  | 2.12716000  | -3.14703300 | -0.97922300 |
| C  | 1.55733500  | -3.06589600 | 1.44129700  |
| C  | 1.64116800  | -4.46612800 | -1.01965800 |
| C  | 1.08959800  | -4.38904000 | 1.34482200  |
| C  | 1.13298200  | -5.08224500 | 0.13004600  |
| H  | 1.65207000  | -5.01251100 | -1.96762900 |
| H  | 0.67709500  | -4.87637300 | 2.23386800  |
| H  | 0.75881000  | -6.10977900 | 0.07640300  |
| C  | 1.67230400  | 2.25779900  | 2.80982800  |
| H  | 2.00254300  | 1.21880700  | 2.63552700  |

|                 |             |             |             |   |             |             |             |
|-----------------|-------------|-------------|-------------|---|-------------|-------------|-------------|
| C               | 2.61534700  | 2.87070300  | 3.86206200  | C | 3.26159700  | -3.39917900 | -1.19914100 |
| H               | 2.56553200  | 2.29475900  | 4.80293700  | H | 1.85834200  | -4.32572500 | -2.55840800 |
| H               | 3.66352000  | 2.87046900  | 3.51492600  | H | 4.43818600  | -2.39710200 | 0.31249500  |
| H               | 2.33593200  | 3.91439300  | 4.09117500  | H | 4.12832700  | -3.62543300 | -1.82778200 |
| C               | 0.22310400  | 2.20114100  | 3.32588700  | C | -3.05923700 | -0.69963300 | 1.98395700  |
| H               | -0.15721000 | 3.20926200  | 3.56790800  | C | -4.17612100 | -1.02971300 | 1.18384300  |
| H               | -0.45854400 | 1.75421400  | 2.58172900  | C | -3.01490200 | 0.42877800  | 2.83586800  |
| H               | 0.17105300  | 1.59331800  | 4.24663000  | C | -5.27931200 | -0.15728900 | 1.23209400  |
| C               | 1.48506300  | -2.31474100 | 2.76440400  | C | -4.14729300 | 1.26224400  | 2.84727700  |
| C               | 2.42930700  | -2.94122400 | 3.80747600  | C | -5.26385400 | 0.97665400  | 2.05125900  |
| H               | 3.47554100  | -2.94730400 | 3.45452800  | H | -6.16098700 | -0.37568400 | 0.62090700  |
| H               | 2.38978200  | -2.37078500 | 4.75229600  | H | -4.15187200 | 2.15125100  | 3.48441600  |
| H               | 2.14232400  | -3.98422300 | 4.03092900  | H | -6.13073900 | 1.64523800  | 2.07206900  |
| C               | 2.62109100  | -2.46108900 | -2.24620700 | C | 2.55369600  | -1.63663500 | 2.13093000  |
| H               | 3.09023900  | -1.50346500 | -1.95939300 | H | 1.57348400  | -1.49497200 | 2.61784400  |
| C               | 2.76312200  | 2.40434200  | -2.21439800 | C | 3.43933200  | -2.44594200 | 3.09730300  |
| C               | 3.88680700  | 3.18036800  | -2.92347700 | H | 3.54529500  | -1.90898900 | 4.05634700  |
| H               | 3.54141600  | 4.16793200  | -3.27665100 | H | 3.01145400  | -3.44229300 | 3.30702400  |
| H               | 4.75038000  | 3.34255600  | -2.25526900 | H | 4.45227300  | -2.59486800 | 2.68288200  |
| H               | 4.23703300  | 2.61727300  | -3.80630200 | C | 3.14650500  | -0.23995000 | 1.87125400  |
| C               | 1.43040400  | -2.13365600 | -3.16848200 | H | 4.12850600  | -0.30689600 | 1.37228100  |
| H               | 0.68238500  | -1.51111800 | -2.64534600 | H | 2.47837600  | 0.37328800  | 1.24543600  |
| H               | 1.77452600  | -1.58382300 | -4.06259500 | H | 3.28886400  | 0.29333200  | 2.82821300  |
| H               | 0.92514100  | -3.05571700 | -3.50682600 | C | -1.81657200 | 0.70394500  | 3.73540100  |
| C               | 3.68556600  | -3.29124700 | -2.98441100 | C | -2.03607900 | 0.05784900  | 5.11941200  |
| H               | 4.05751200  | -2.73435700 | -3.86221800 | H | -2.20931400 | -1.02957500 | 5.04837900  |
| H               | 4.54667900  | -3.51717300 | -2.33146700 | H | -1.15306100 | 0.22188500  | 5.76168900  |
| H               | 3.27691400  | -4.24958200 | -3.35024200 | H | -2.91179200 | 0.50615600  | 5.62249700  |
| C               | 0.04012000  | -2.24296800 | 3.28976200  | C | -4.22324900 | -2.28060200 | 0.31440900  |
| H               | -0.64362700 | -1.80654000 | 2.54171500  | H | -3.27453500 | -2.82955700 | 0.44314100  |
| H               | -0.34479900 | -3.24394500 | 3.55326900  | C | -0.53009100 | -3.96528600 | -1.28562800 |
| H               | -0.00205500 | -1.61896700 | 4.20010700  | C | -0.62928400 | -5.50222100 | -1.25794400 |
| H               | 1.82284400  | -1.27821100 | 2.59076600  | H | 0.08799900  | -5.96218900 | -1.96053300 |
| C               | 1.56277800  | 2.17653000  | -3.15368400 | H | -0.41817000 | -5.90104600 | -0.25043400 |
| H               | 1.87759900  | 1.62432200  | -4.05704500 | H | -1.64382800 | -5.82750600 | -1.54910900 |
| H               | 0.77035000  | 1.59362600  | -2.65061500 | C | -4.35016800 | -1.92770800 | -1.17808500 |
| H               | 1.12301200  | 3.13702500  | -3.47589600 | H | -3.49985500 | -1.30455300 | -1.50797000 |
| H               | 3.16581700  | 1.41196400  | -1.94586800 | H | -4.36237300 | -2.84657100 | -1.79057800 |
| O               | -2.16084400 | 0.20209500  | -0.63528300 | H | -5.28228400 | -1.37264300 | -1.38512800 |
| S               | -3.09003300 | -0.00952100 | 0.59993000  | C | -5.35814100 | -3.21842000 | 0.76619900  |
| O               | -3.06771100 | 1.12847400  | 1.55148200  | H | -5.34982300 | -4.14600800 | 0.16704000  |
| O               | -3.02624100 | -1.38592600 | 1.15111900  | H | -5.25009200 | -3.49554500 | 1.82928900  |
| C               | -4.72577300 | 0.10511700  | -0.30080800 | H | -6.34785600 | -2.74546500 | 0.63926100  |
| F               | -4.85300400 | 1.30663000  | -0.89424700 | C | -1.50322200 | 2.19935200  | 3.89018000  |
| F               | -4.81567600 | -0.85981900 | -1.23502700 | H | -1.40603200 | 2.69915600  | 2.91595500  |
| F               | -5.72526800 | -0.05202800 | 0.58996700  | H | -2.27893400 | 2.72275900  | 4.47725500  |
| <b>Int1_TfO</b> |             |             |             | H | -0.54697100 | 2.32212300  | 4.42675600  |
| N               | 2.00327700  | 0.94619600  | -2.36387200 | H | -0.93312700 | 0.22842400  | 3.27439400  |
| C               | 3.17063000  | 0.23938600  | -2.48911400 | C | -0.88435200 | -3.41081300 | -2.67661500 |
| C               | -0.94010200 | -1.45988600 | 0.95428800  | H | -1.90384800 | -3.72172500 | -2.96598700 |
| C               | -0.50888500 | -3.23832700 | 2.29734500  | H | -0.84893400 | -2.30703200 | -2.68117000 |
| C               | -1.65720500 | -2.64950800 | 2.75083700  | H | -0.18860900 | -3.77785800 | -3.45129300 |
| H               | 0.04318300  | -4.10732900 | 2.64517900  | H | -1.28021300 | -3.57261300 | -0.57746700 |
| H               | -2.32184200 | -2.90132700 | 3.57213400  | C | 4.30143500  | 0.65720500  | -1.60300300 |
| N               | -1.90204500 | -1.56100300 | 1.91833200  | C | 4.31872700  | 1.84467800  | -0.84722900 |
| N               | -0.08549600 | -2.49490700 | 1.19900200  | C | 5.41266700  | -0.20932200 | -1.51650500 |
| Au              | -0.92986400 | -0.18982500 | -0.61726800 | C | 5.39236900  | 2.15104200  | -0.00297400 |
| C               | 1.06330300  | -2.80599100 | 0.38145100  | H | 3.49729000  | 2.56555900  | -0.90478500 |
| C               | 0.84976800  | -3.50284300 | -0.83098400 | C | 6.48663200  | 0.07875800  | -0.67842700 |
| C               | 2.33872300  | -2.39354400 | 0.82681300  | H | 5.40617800  | -1.11986000 | -2.12228200 |
| C               | 1.98297000  | -3.79013700 | -1.61205400 | C | 6.48006400  | 1.26079700  | 0.09624900  |
| C               | 3.43645200  | -2.71315900 | 0.00712600  | H | 5.36585900  | 3.07881200  | 0.57276500  |
|                 |             |             |             | H | 7.34588100  | -0.59483500 | -0.60184500 |

|   |             |             |             |   |            |             |             |
|---|-------------|-------------|-------------|---|------------|-------------|-------------|
| O | 7.56672400  | 1.45220200  | 0.89628300  | H | 5.00424300 | -2.18435600 | 4.40339000  |
| C | 7.57550500  | 2.62032000  | 1.72490000  | H | 3.32199600 | -2.50875700 | 4.91164000  |
| H | 6.71856700  | 2.62599700  | 2.42330300  | H | 4.27674700 | -3.79000800 | 4.12401200  |
| H | 8.51351800  | 2.56974600  | 2.29713900  | C | 6.32796000 | -0.35860700 | -1.13932900 |
| H | 7.56580500  | 3.54655600  | 1.12143800  | H | 5.91624900 | 0.57530100  | -0.71895500 |
| O | 3.27613300  | -0.71169900 | -3.29029300 | C | 3.38710000 | 3.22840000  | -1.51965700 |
| C | 0.87817500  | 0.62372200  | -3.21605300 | C | 3.98297700 | 4.63017100  | -1.74224100 |
| C | -0.40937800 | 0.84568700  | -2.54334900 | H | 3.27943900 | 5.28736900  | -2.28279900 |
| C | -1.55266900 | 1.17841300  | -2.16815900 | H | 4.23379200 | 5.11867300  | -0.78464000 |
| H | -2.50873100 | 1.67726200  | -2.08259100 | H | 4.90670800 | 4.56213500  | -2.34336000 |
| H | 1.88798300  | 1.75695000  | -1.73294300 | C | 5.71088700 | -0.54838300 | -2.53855300 |
| H | 0.86136500  | 1.23956900  | -4.14080400 | H | 4.61080300 | -0.63139100 | -2.48213200 |
| H | 0.98842600  | -0.42917800 | -3.53451400 | H | 5.95994400 | 0.30857100  | -3.18909100 |
| O | 1.26038900  | 3.29951900  | -1.03376600 | H | 6.09544000 | -1.46484400 | -3.02055200 |
| S | 0.96132700  | 3.47763600  | 0.43563800  | C | 7.85457500 | -0.18695100 | -1.22312300 |
| O | 1.78788800  | 4.51603700  | 1.11063400  | H | 8.10349400 | 0.68802100  | -1.84877300 |
| O | 0.75611800  | 2.20360800  | 1.19063000  | H | 8.29825800 | -0.03099300 | -0.22454100 |
| C | -0.75214400 | 4.23360800  | 0.36774600  | H | 8.34216600 | -1.06793800 | -1.67595200 |
| F | -0.80441800 | 5.24364000  | -0.52677200 | C | 2.22553100 | -2.93408200 | 2.39427800  |
| F | -1.68110200 | 3.30754300  | 0.00913700  | H | 1.83909800 | -2.57469900 | 1.42342400  |
| F | -1.11103100 | 4.72530900  | 1.57866000  | H | 2.36586600 | -4.02726400 | 2.32088600  |

### TS1\_5exo\_TfO

|    |             |             |             |
|----|-------------|-------------|-------------|
| N  | -2.30188400 | -0.41852600 | -0.82828600 |
| C  | -2.84259700 | -1.58318900 | -1.27837300 |
| C  | 3.30142100  | 0.40836200  | 0.47996500  |
| C  | 4.18944000  | 2.03348300  | 1.79490900  |
| C  | 5.01461400  | 0.94356800  | 1.87159300  |
| H  | 4.23965400  | 3.01365200  | 2.26159800  |
| H  | 5.93801500  | 0.77195900  | 2.41839900  |
| N  | 4.45291100  | -0.03890300 | 1.05991000  |
| N  | 3.14961400  | 1.68509700  | 0.93887900  |
| Au | 2.03608300  | -0.57872400 | -0.73570100 |
| C  | 2.04165500  | 2.53151000  | 0.56194700  |
| C  | 2.14785300  | 3.27749300  | -0.63402900 |
| C  | 0.88925100  | 2.53265400  | 1.37999300  |
| C  | 1.03400900  | 4.05198000  | -1.00738100 |
| C  | -0.19357900 | 3.32562700  | 0.95897300  |
| C  | -0.12453200 | 4.07428200  | -0.22191500 |
| H  | 1.07500800  | 4.63561500  | -1.93274900 |
| H  | -1.11568500 | 3.34600000  | 1.54568600  |
| H  | -0.99401700 | 4.66170700  | -0.53031100 |
| C  | 5.00461200  | -1.35234100 | 0.83076400  |
| C  | 5.92935600  | -1.51136200 | -0.22580900 |
| C  | 4.57644600  | -2.41588000 | 1.65660600  |
| C  | 6.44030500  | -2.80397200 | -0.44141100 |
| C  | 5.11912800  | -3.68747500 | 1.39584900  |
| C  | 6.04224500  | -3.87950400 | 0.36129700  |
| H  | 7.15364200  | -2.96891700 | -1.25509800 |
| H  | 4.80728600  | -4.53833400 | 2.00986700  |
| H  | 6.45062500  | -4.87812000 | 0.17485000  |
| C  | 0.77232500  | 1.67743300  | 2.63612000  |
| H  | 1.76783200  | 1.25741100  | 2.86546700  |
| C  | 0.33226300  | 2.50831800  | 3.85417000  |
| H  | 0.32518100  | 1.87835700  | 4.76100600  |
| H  | 1.01568600  | 3.35710500  | 4.03129200  |
| H  | -0.68612600 | 2.91267700  | 3.72253900  |
| C  | -0.19176800 | 0.49817400  | 2.39319800  |
| H  | -1.20203800 | 0.85671800  | 2.12878400  |
| H  | 0.16620000  | -0.14815100 | 1.57141700  |
| H  | -0.27431000 | -0.12427400 | 3.30240400  |
| C  | 3.54448000  | -2.22668500 | 2.76104000  |
| C  | 4.07160400  | -2.70513800 | 4.12525800  |

|   |             |             |             |
|---|-------------|-------------|-------------|
| H | 5.00424300  | -2.18435600 | 4.40339000  |
| H | 3.32199600  | -2.50875700 | 4.91164000  |
| H | 4.27674700  | -3.79000800 | 4.12401200  |
| C | 6.32796000  | -0.35860700 | -1.13932900 |
| H | 5.91624900  | 0.57530100  | -0.71895500 |
| C | 3.38710000  | 3.22840000  | -1.51965700 |
| C | 3.98297700  | 4.63017100  | -1.74224100 |
| H | 3.27943900  | 5.28736900  | -2.28279900 |
| H | 4.23379200  | 5.11867300  | -0.78464000 |
| H | 4.90670800  | 4.56213500  | -2.34336000 |
| C | 5.71088700  | -0.54838300 | -2.53855300 |
| H | 4.61080300  | -0.63139100 | -2.48213200 |
| H | 5.95994400  | 0.30857100  | -3.18909100 |
| H | 6.09544000  | -1.46484400 | -3.02055200 |
| C | 7.85457500  | -0.18695100 | -1.22312300 |
| H | 8.10349400  | 0.68802100  | -1.84877300 |
| H | 8.29825800  | -0.03099300 | -0.22454100 |
| H | 8.34216600  | -1.06793800 | -1.67595200 |
| C | 2.22553100  | -2.93408200 | 2.39427800  |
| H | 1.83909800  | -2.57469900 | 1.42342400  |
| H | 2.36586600  | -4.02726400 | 2.32088600  |
| H | 1.45691600  | -2.73983900 | 3.16288200  |
| H | 3.32682400  | -1.14827000 | 2.84958600  |
| C | 3.07215500  | 2.53952200  | -2.86108400 |
| H | 3.98435400  | 2.46122600  | -3.47901700 |
| H | 2.67516200  | 1.52052200  | -2.70089700 |
| H | 2.31997400  | 3.10888500  | -3.43549000 |
| H | 4.15351900  | 2.62059300  | -1.00752900 |
| C | -4.11613100 | -2.07008200 | -0.68896900 |
| C | -4.84174700 | -1.36378800 | 0.29052800  |
| C | -4.62721700 | -3.30210000 | -1.15571000 |
| C | -6.04541000 | -1.86744000 | 0.79491900  |
| H | -4.48466800 | -0.40382700 | 0.67514600  |
| C | -5.82195100 | -3.81362800 | -0.66122700 |
| H | -4.06304800 | -3.84580800 | -1.91886200 |
| C | -6.54350200 | -3.09827300 | 0.32089800  |
| H | -6.58681200 | -1.29416600 | 1.55076400  |
| H | -6.22377100 | -4.76650500 | -1.01848900 |
| O | -7.70086700 | -3.67797900 | 0.74253100  |
| C | -8.46620100 | -2.98460300 | 1.73521400  |
| H | -8.80084000 | -1.99608400 | 1.37105600  |
| H | -9.34388000 | -3.61900300 | 1.92707500  |
| H | -7.89275800 | -2.85888000 | 2.67179800  |
| O | -2.23458400 | -2.22269100 | -2.17727800 |
| C | -1.16835500 | 0.07685900  | -1.58439300 |
| C | -0.19363400 | -0.99578300 | -1.81897000 |
| C | 0.80514100  | -1.75162600 | -1.97684700 |
| H | 1.10763500  | -2.70626700 | -2.39863700 |
| H | -2.76728000 | 0.24944400  | -0.18509300 |
| H | -1.47902000 | 0.48696800  | -2.56686600 |
| H | -0.70394100 | 0.90436000  | -1.02351400 |
| O | -3.32962100 | 1.55658700  | 0.90862100  |
| S | -3.67950600 | 2.76338900  | 0.05931200  |
| O | -3.21208300 | 2.66174600  | -1.35463300 |
| O | -3.46076400 | 4.06887700  | 0.74412000  |
| C | -5.54118100 | 2.63088600  | -0.06572400 |
| F | -5.89695600 | 1.48901600  | -0.70135600 |
| F | -6.10262800 | 2.62086700  | 1.16485600  |
| F | -6.04797100 | 3.67566500  | -0.75707500 |

### TS1\_6endo\_TfO

|   |            |            |             |
|---|------------|------------|-------------|
| N | 2.32811300 | 0.80788600 | -1.61748800 |
| C | 2.66526000 | 2.09406300 | -1.75760600 |

|    |             |             |             |                      |             |             |             |
|----|-------------|-------------|-------------|----------------------|-------------|-------------|-------------|
| C  | -3.37579200 | -0.54337700 | 0.37580100  | H                    | -2.58307600 | -1.48378000 | -2.90589800 |
| C  | -4.49146200 | -2.29373600 | 1.30681500  | H                    | -2.08004100 | -2.99863500 | -3.70349200 |
| C  | -5.29119400 | -1.18846000 | 1.42105000  | H                    | -4.14099200 | -2.76264700 | -1.42459700 |
| H  | -4.63729800 | -3.32408600 | 1.61986500  | C                    | 4.06501600  | 2.52444400  | -1.52435700 |
| H  | -6.27914900 | -1.05436300 | 1.85330400  | C                    | 5.08180000  | 1.63423200  | -1.12224900 |
| N  | -4.59326000 | -0.12776700 | 0.84703400  | C                    | 4.38450000  | 3.89357900  | -1.68681200 |
| N  | -3.32883600 | -1.88154200 | 0.66787500  | C                    | 6.37901900  | 2.09277200  | -0.87771500 |
| Au | -1.84176800 | 0.45499800  | -0.50471100 | H                    | 4.88409300  | 0.56698500  | -0.98216200 |
| C  | -2.17837400 | -2.70831800 | 0.35127600  | C                    | 5.67592700  | 4.35507300  | -1.45982600 |
| C  | -2.14129700 | -3.35330400 | -0.90755500 | H                    | 3.59664900  | 4.58686200  | -1.99270600 |
| C  | -1.10920400 | -2.75250200 | 1.27882700  | C                    | 6.68650800  | 3.45722400  | -1.04917300 |
| C  | -0.95759000 | -4.03668100 | -1.24100300 | H                    | 7.13235500  | 1.37568400  | -0.54409700 |
| C  | 0.05775700  | -3.42670000 | 0.87541000  | H                    | 5.93403700  | 5.41056500  | -1.58521300 |
| C  | 0.13974300  | -4.05298700 | -0.37308900 | O                    | 7.91611700  | 4.00905800  | -0.84382400 |
| H  | -0.88679300 | -4.53866900 | -2.21196300 | C                    | 8.96928000  | 3.13914200  | -0.42615700 |
| H  | 0.93822400  | -3.43113900 | 1.52322900  | H                    | 9.16306100  | 2.34945700  | -1.17572900 |
| H  | 1.08276600  | -4.52501000 | -0.66295000 | H                    | 9.85901300  | 3.77746000  | -0.32774500 |
| C  | -5.08646000 | 1.23023300  | 0.77418600  | H                    | 8.74362800  | 2.66879400  | 0.54889800  |
| C  | -5.84538200 | 1.61178000  | -0.35728100 | O                    | 1.80943900  | 3.00604100  | -2.09447000 |
| C  | -4.79187500 | 2.11128000  | 1.84124300  | C                    | 0.99047800  | 0.26010700  | -1.78869600 |
| C  | -6.31747500 | 2.93647900  | -0.39697100 | C                    | -0.11343400 | 1.20380200  | -1.33837700 |
| C  | -5.29414700 | 3.42214000  | 1.74766500  | C                    | 0.00741700  | 2.48792200  | -1.43037200 |
| C  | -6.04801000 | 3.83214200  | 0.64325700  | H                    | -0.37346500 | 3.48954800  | -1.28690100 |
| H  | -6.90251600 | 3.27013600  | -1.26030300 | H                    | 3.02882800  | 0.08321100  | -1.32614300 |
| H  | -5.08498000 | 4.13258500  | 2.55411400  | H                    | 0.80863800  | 0.01271300  | -2.85363800 |
| H  | -6.42604000 | 4.85843200  | 0.59120800  | H                    | 0.96554000  | -0.68158200 | -1.22070700 |
| C  | -1.17486300 | -2.09863200 | 2.65717100  | O                    | 3.87349400  | -1.41660600 | -1.14095100 |
| H  | -2.19917700 | -1.70936400 | 2.80851800  | S                    | 3.61854800  | -2.09873900 | 0.19291600  |
| C  | -0.91478700 | -3.13570900 | 3.77004200  | O                    | 3.33946000  | -3.55696600 | 0.09572100  |
| H  | -1.02690600 | -2.66475000 | 4.76238100  | O                    | 2.73692600  | -1.30116100 | 1.09677900  |
| H  | -1.61870500 | -3.98402600 | 3.70831800  | C                    | 5.30919000  | -2.10851900 | 0.99900800  |
| H  | 0.10925300  | -3.54156400 | 3.70748800  | F                    | 5.26188500  | -2.51332600 | 2.25385900  |
| C  | -0.19806700 | -0.90969300 | 2.77126200  | F                    | 6.21407600  | -2.72634900 | 0.29131800  |
| H  | 0.84200600  | -1.21099900 | 2.56188800  | F                    | 5.74618100  | -0.73121000 | 1.07201700  |
| H  | -0.45765700 | -0.11566700 | 2.04851100  |                      |             |             |             |
| H  | -0.24367800 | -0.47800600 | 3.78770300  |                      |             |             |             |
| C  | -3.96432900 | 1.69413700  | 3.05310100  | <b>Int2_5exo_TfO</b> |             |             |             |
| C  | -4.78815600 | 1.78770400  | 4.35386400  | N                    | 3.18895500  | -0.23941300 | -0.78063300 |
| H  | -5.70058200 | 1.16885800  | 4.30107600  | C                    | 3.54648400  | -1.48062400 | -0.51225200 |
| H  | -4.18756200 | 1.44084300  | 5.21253900  | C                    | -3.17331300 | 0.43275800  | 0.10830400  |
| H  | -5.09938300 | 2.82675900  | 4.56132300  | C                    | -4.39007300 | 2.34639800  | 0.37346200  |
| C  | -6.13389800 | 0.66003800  | -1.51467900 | C                    | -5.24937000 | 1.36819700  | -0.04803600 |
| H  | -5.75543900 | -0.34026100 | -1.23957000 | H                    | -4.55203300 | 3.39261500  | 0.61963800  |
| C  | -3.29947600 | -3.29842000 | -1.90069400 | H                    | -6.31675800 | 1.38271700  | -0.25210100 |
| C  | -3.80522900 | -4.70960700 | -2.26248900 | N                    | -4.48794700 | 0.21191300  | -0.20207500 |
| H  | -3.02218800 | -5.30247500 | -2.76636900 | N                    | -3.13152300 | 1.75788400  | 0.45728300  |
| H  | -4.12041500 | -5.26797500 | -1.36431200 | Au                   | -1.57404800 | -0.82723400 | 0.06793700  |
| H  | -4.66758800 | -4.64419800 | -2.94916300 | C                    | -1.92489200 | 2.40690400  | 0.91348400  |
| C  | -5.37963700 | 1.10043000  | -2.78638000 | C                    | -1.56605300 | 2.26125900  | 2.27194600  |
| H  | -4.29242800 | 1.15464200  | -2.60383500 | C                    | -1.13738400 | 3.11329400  | -0.02523200 |
| H  | -5.55730600 | 0.38230000  | -3.60619100 | C                    | -0.35756000 | 2.85075900  | 2.68515100  |
| H  | -5.71779900 | 2.09482200  | -3.12819400 | C                    | 0.07286600  | 3.66229500  | 0.43597900  |
| C  | -7.64621600 | 0.51980700  | -1.77980800 | C                    | 0.45787800  | 3.53361300  | 1.77681900  |
| H  | -7.82537200 | -0.21539400 | -2.58343600 | H                    | -0.04940900 | 2.75952300  | 3.73175200  |
| H  | -8.18550700 | 0.18151900  | -0.87828600 | H                    | 0.73471000  | 4.17517400  | -0.26640900 |
| H  | -8.09475100 | 1.47648000  | -2.10024700 | H                    | 1.40693700  | 3.96271600  | 2.10904900  |
| C  | -2.66422000 | 2.51784400  | 3.15287200  | C                    | -5.00049200 | -1.06911700 | -0.62077300 |
| H  | -2.05873800 | 2.41584600  | 2.23598200  | C                    | -5.47952700 | -1.95437800 | 0.37090600  |
| H  | -2.87583800 | 3.59078300  | 3.30714400  | C                    | -4.96880000 | -1.38993900 | -1.99562600 |
| H  | -2.05538200 | 2.16858000  | 4.00474800  | C                    | -5.94218400 | -3.21109900 | -0.05868500 |
| H  | -3.66940900 | 0.63833300  | 2.92386500  | C                    | -5.44489200 | -2.65954800 | -2.37130100 |
| C  | -2.90898400 | -2.50635800 | -3.16552000 | C                    | -5.92543400 | -3.56060600 | -1.41432200 |
| H  | -3.76636900 | -2.43384700 | -3.85839100 | H                    | -6.31128700 | -3.92764900 | 0.68183300  |
|    |             |             |             | H                    | -5.42740800 | -2.94661300 | -3.42774600 |



|   |             |             |             |
|---|-------------|-------------|-------------|
| H | -6.28595700 | -4.54616200 | -1.72688600 |
| C | -1.54778300 | 3.23278900  | -1.48866200 |
| H | -2.63442600 | 3.04376000  | -1.55193500 |
| C | -1.28767200 | 4.63630600  | -2.06186400 |
| H | -1.69742800 | 4.70559300  | -3.08484000 |
| H | -1.76156300 | 5.42281300  | -1.44887300 |
| H | -0.20780000 | 4.85551800  | -2.12687700 |
| C | -0.83678400 | 2.16111900  | -2.33986900 |
| H | 0.25383300  | 2.33151700  | -2.34130700 |
| H | -1.03191600 | 1.14674600  | -1.94685700 |
| H | -1.19358000 | 2.20156500  | -3.38495100 |
| C | -4.41094800 | -0.43263700 | -3.04060500 |
| C | -5.44041600 | -0.12974200 | -4.14332300 |
| H | -6.36886400 | 0.29326200  | -3.72123800 |
| H | -5.02696100 | 0.60012900  | -4.86155500 |
| H | -5.71007700 | -1.03866500 | -4.70951400 |
| C | -5.45393500 | -1.59898000 | 1.85198600  |
| H | -5.23818100 | -0.51986600 | 1.94202500  |
| C | -2.42715500 | 1.49945400  | 3.27197700  |
| C | -2.98203300 | 2.44515500  | 4.35346200  |
| H | -2.16679900 | 2.91083800  | 4.93531700  |
| H | -3.58374200 | 3.25658900  | 3.90788700  |
| H | -3.62518200 | 1.88917700  | 5.05851500  |
| C | -4.31581300 | -2.35836600 | 2.56168100  |
| H | -3.34004700 | -2.13890100 | 2.09200900  |
| H | -4.26225400 | -2.06878900 | 3.62637100  |
| H | -4.47981600 | -3.44990000 | 2.51259800  |
| C | -6.80763200 | -1.85375200 | 2.53658000  |
| H | -6.76867300 | -1.51807000 | 3.58777200  |
| H | -7.62386100 | -1.30736300 | 2.03262300  |
| H | -7.07033400 | -2.92630000 | 2.54101800  |
| C | -3.09917100 | -0.98367900 | -3.63083100 |
| H | -2.35738000 | -1.17377300 | -2.83424100 |
| H | -3.27119400 | -1.93266200 | -4.16987600 |
| H | -2.66370000 | -0.26187600 | -4.34429000 |
| H | -4.17230300 | 0.52129100  | -2.54059700 |
| C | -1.64770400 | 0.32912200  | 3.89815800  |
| H | -2.30160600 | -0.25273100 | 4.57161400  |
| H | -1.26312200 | -0.34962100 | 3.11646100  |
| H | -0.78783200 | 0.68807300  | 4.49105800  |
| H | -3.28765700 | 1.07013900  | 2.73063300  |
| C | 4.87961800  | -2.04184000 | -0.53514500 |
| C | 5.99936900  | -1.25011500 | -0.87861100 |
| C | 5.06938400  | -3.40560400 | -0.19705900 |
| C | 7.27925900  | -1.80083800 | -0.88668700 |
| H | 5.87793600  | -0.19460000 | -1.14215300 |
| C | 6.34177400  | -3.95770300 | -0.20342000 |
| H | 4.20755300  | -4.02205700 | 0.07094000  |
| C | 7.45999600  | -3.16118000 | -0.54809500 |
| H | 8.12948400  | -1.17054300 | -1.15434900 |
| H | 6.50492200  | -5.00738300 | 0.05547300  |
| O | 8.65588100  | -3.79300100 | -0.52302200 |
| C | 9.82818600  | -3.03482800 | -0.86236100 |
| H | 9.97880000  | -2.19569100 | -0.16044700 |
| H | 10.66626500 | -3.74069400 | -0.77673700 |
| H | 9.77117500  | -2.65345500 | -1.89712600 |
| O | 2.51293300  | -2.25650600 | -0.17800800 |
| C | 1.74398300  | -0.06096400 | -0.62900700 |
| C | 1.30148400  | -1.45248000 | -0.22077000 |
| C | 0.10315700  | -1.97862700 | 0.05926200  |
| H | 0.10283300  | -3.04978700 | 0.31207900  |
| H | 3.83242900  | 0.53491500  | -1.09328800 |
| H | 1.53120600  | 0.70966800  | 0.13183600  |

|   |            |            |             |
|---|------------|------------|-------------|
| H | 1.29825700 | 0.27160600 | -1.58102000 |
| O | 4.81042900 | 1.79961200 | -1.60932200 |
| S | 4.04110300 | 3.10794300 | -1.58523500 |
| O | 2.59915200 | 2.95589800 | -1.93969700 |
| O | 4.77157600 | 4.25497700 | -2.17988400 |
| C | 3.99930900 | 3.47924100 | 0.24522800  |
| F | 3.41661600 | 2.45652400 | 0.92281300  |
| F | 5.24371200 | 3.65248100 | 0.73613600  |
| F | 3.28782400 | 4.60727100 | 0.49044600  |

### Int2\_6endo\_TfO

|    |             |             |             |
|----|-------------|-------------|-------------|
| N  | 2.28745200  | 0.64003300  | -1.43083800 |
| C  | 2.60996400  | 1.91512500  | -1.42090300 |
| C  | -3.43167200 | -0.53563700 | 0.38800400  |
| C  | -4.53188500 | -2.31711500 | 1.29453200  |
| C  | -5.35378600 | -1.22691000 | 1.40032900  |
| H  | -4.66289700 | -3.35273500 | 1.59744200  |
| H  | -6.35216100 | -1.11216300 | 1.81435000  |
| N  | -4.66279000 | -0.15253400 | 0.84239800  |
| N  | -3.36829300 | -1.87434400 | 0.67588300  |
| Au | -1.86823400 | 0.47043500  | -0.43340100 |
| C  | -2.19838400 | -2.66372000 | 0.36571900  |
| C  | -2.12583200 | -3.28444300 | -0.90171100 |
| C  | -1.13889700 | -2.69033100 | 1.30083700  |
| C  | -0.93001700 | -3.95122900 | -1.22571200 |
| C  | 0.04048800  | -3.35518500 | 0.91821000  |
| C  | 0.14756400  | -3.97467600 | -0.33243800 |
| H  | -0.83518900 | -4.43350500 | -2.20418000 |
| H  | 0.90114400  | -3.36319400 | 1.59243600  |
| H  | 1.08923000  | -4.45825800 | -0.60957400 |
| C  | -5.16237700 | 1.19721500  | 0.75607600  |
| C  | -5.91661500 | 1.56107200  | -0.38152700 |
| C  | -4.85755300 | 2.09381500  | 1.80413100  |
| C  | -6.38464800 | 2.88610000  | -0.44575100 |
| C  | -5.35038600 | 3.40659500  | 1.68987900  |
| C  | -6.10825100 | 3.79783200  | 0.58002900  |
| H  | -6.96640800 | 3.20842200  | -1.31530300 |
| H  | -5.12919100 | 4.13227200  | 2.47919600  |
| H  | -6.48026600 | 4.82530400  | 0.51006100  |
| C  | -1.22689900 | -2.01211200 | 2.66223300  |
| H  | -2.23770600 | -1.57994500 | 2.76967400  |
| C  | -1.03727700 | -3.03409400 | 3.79832700  |
| H  | -1.14636000 | -2.53967500 | 4.77983700  |
| H  | -1.78313500 | -3.84624500 | 3.73838400  |
| H  | -0.03310500 | -3.49165300 | 3.76285700  |
| C  | -0.21220000 | -0.85868900 | 2.77377200  |
| H  | 0.82492200  | -1.21340300 | 2.64692400  |
| H  | -0.39880300 | -0.09661300 | 1.99583000  |
| H  | -0.29427700 | -0.37175900 | 3.76230800  |
| C  | -3.99531500 | 1.69032600  | 2.99289200  |
| C  | -4.69921600 | 1.95732800  | 4.33447200  |
| H  | -5.66697800 | 1.42937600  | 4.39407900  |
| H  | -4.06667800 | 1.60868100  | 5.16968900  |
| H  | -4.89011300 | 3.03394600  | 4.48925300  |
| C  | -6.16955500 | 0.58941800  | -1.52722000 |
| H  | -5.84858100 | -0.41544200 | -1.20225700 |
| C  | -3.25814300 | -3.19645300 | -1.91760100 |
| C  | -3.73140600 | -4.58974400 | -2.36837800 |
| H  | -2.92627400 | -5.14489400 | -2.88120400 |
| H  | -4.06777000 | -5.19873800 | -1.51117600 |
| H  | -4.57437900 | -4.49690900 | -3.07597700 |
| C  | -5.31056700 | 0.97576000  | -2.74735100 |
| H  | -4.23847200 | 1.00921000  | -2.48391000 |



|   |             |             |             |   |             |             |             |
|---|-------------|-------------|-------------|---|-------------|-------------|-------------|
| H | 5.14549700  | 1.47151000  | 2.00030400  | C | -1.58785800 | -0.29597100 | 4.84707600  |
| O | 7.35859600  | 2.41195500  | 1.19255000  | H | -0.80909100 | 0.15027800  | 5.48950800  |
| C | 8.59339400  | 2.87695100  | 0.65181200  | H | -2.49090900 | 0.33588300  | 4.91193300  |
| H | 8.43735200  | 3.69453400  | -0.07748900 | H | -1.84214500 | -1.28514800 | 5.26663000  |
| H | 9.16850600  | 3.25805300  | 1.50794300  | C | 3.83782400  | -0.90085200 | 2.01751100  |
| H | 9.15808100  | 2.05908700  | 0.16571100  | H | 3.56121700  | -0.08263800 | 1.32970800  |
| O | 2.18207500  | -0.12128400 | -1.49367300 | C | 3.16197800  | 3.33982000  | -0.71978100 |
| C | 2.19636400  | -0.78443500 | -3.70139200 | C | 4.10179700  | 4.15988900  | 0.19225700  |
| C | 1.37252900  | -0.70477200 | -2.42787500 | H | 4.17305900  | 5.20561300  | -0.15762000 |
| C | 0.10858800  | -1.13944500 | -2.11168600 | H | 3.75586600  | 4.17667500  | 1.24054000  |
| H | -0.39901000 | -1.61521000 | -2.96502500 | H | 5.11667900  | 3.72588800  | 0.17812400  |
| H | 0.27056400  | -2.09451600 | -1.10448600 | C | 4.63157300  | -1.92308600 | 1.18572000  |
| H | 1.72531900  | -0.21705600 | -4.52782200 | H | 5.43434600  | -1.40603800 | 0.63540000  |
| H | 2.29533600  | -1.82873400 | -4.05567900 | H | 5.10455300  | -2.69411800 | 1.82093000  |
| O | 0.39876000  | -3.12341000 | -0.33404200 | H | 3.99276500  | -2.42186400 | 0.44190600  |
| S | 0.96476000  | -2.78220300 | 1.07694100  | C | 4.72851500  | -0.31545400 | 3.13648100  |
| O | -0.06664100 | -2.27638900 | 2.02049700  | H | 5.65192900  | 0.10841100  | 2.70466100  |
| O | 2.26710500  | -2.07230600 | 1.02783500  | H | 4.22109600  | 0.48643300  | 3.69983300  |
| C | 1.33845300  | -4.52917200 | 1.65579700  | H | 5.01846000  | -1.10204600 | 3.85619200  |
| F | 1.88234200  | -4.47336800 | 2.88879200  | C | -2.22842000 | -0.98036300 | 2.47853700  |
| F | 0.20434900  | -5.25805700 | 1.71500000  | H | -1.90344800 | -1.01988600 | 1.42484500  |
| F | 2.20522100  | -5.13242000 | 0.82266300  | H | -2.51064900 | -2.00273800 | 2.78666900  |

### TS2\_gendo\_TfO

|    |             |             |             |   |             |             |             |
|----|-------------|-------------|-------------|---|-------------|-------------|-------------|
| N  | -2.36301800 | 0.48328100  | -2.61086200 | H | -0.90670000 | 0.61654700  | 3.02718900  |
| C  | -2.69191800 | -0.59855200 | -2.00732400 | C | 3.74932700  | 3.23323500  | -2.13866700 |
| C  | 1.02315800  | 1.18305200  | 1.13365200  | H | 4.67663700  | 2.63868300  | -2.11245200 |
| C  | 1.55849900  | 2.89111100  | 2.53662900  | H | 3.05521700  | 2.72326100  | -2.82675900 |
| C  | 1.72231000  | 1.72361200  | 3.22844600  | H | 3.99707400  | 4.22386900  | -2.56173900 |
| H  | 1.69666100  | 3.92802700  | 2.82986800  | H | 3.11162400  | 2.30902400  | -0.32709300 |
| H  | 2.02927900  | 1.53028300  | 4.25229800  | C | -4.02159200 | -0.80920500 | -1.40184600 |
| N  | 1.39735800  | 0.68820800  | 2.35519700  | C | -5.02379100 | 0.16304000  | -1.58775400 |
| N  | 1.13439300  | 2.54385500  | 1.25662500  | C | -4.32667300 | -1.95715800 | -0.63614900 |
| Au | 0.47013200  | 0.19919900  | -0.53949600 | C | -6.29413100 | 0.01088700  | -1.02592200 |
| C  | 0.76929600  | 3.50943200  | 0.23630600  | H | -4.78358800 | 1.04565400  | -2.18722600 |
| C  | 1.74896100  | 3.91895700  | -0.70320400 | C | -5.59061000 | -2.11960300 | -0.07189300 |
| C  | -0.55188500 | 4.01735900  | 0.25007800  | H | -3.56276800 | -2.72386700 | -0.48624900 |
| C  | 1.36495300  | 4.90592600  | -1.62971300 | C | -6.58568900 | -1.13802400 | -0.26128400 |
| C  | -0.87266400 | 5.00341400  | -0.70041300 | H | -7.04937700 | 0.78275300  | -1.19225500 |
| C  | 0.07548400  | 5.44941600  | -1.62502400 | H | -5.83765900 | -3.00492300 | 0.52118800  |
| H  | 2.09131100  | 5.24376900  | -2.37384000 | O | -7.79056400 | -1.39530000 | 0.33029700  |
| H  | -1.88560300 | 5.41816200  | -0.71799600 | C | -8.83297900 | -0.43981800 | 0.14785600  |
| H  | -0.19478600 | 6.21661900  | -2.35809200 | H | -9.09171600 | -0.31885800 | -0.92114200 |
| C  | 1.36939400  | -0.70952100 | 2.73935300  | H | -9.70193700 | -0.83983900 | 0.69002300  |
| C  | 2.54985000  | -1.48005600 | 2.59688200  | H | -8.56108400 | 0.54677600  | 0.56914800  |
| C  | 0.16278400  | -1.22935500 | 3.26548300  | O | -1.85278900 | -1.71239700 | -1.81498300 |
| C  | 2.49286200  | -2.81676200 | 3.03196600  | C | -1.03513500 | 0.55846200  | -3.23722600 |
| C  | 0.16806400  | -2.57476900 | 3.67766600  | C | 0.01393700  | -0.34748500 | -2.61430700 |
| C  | 1.32006600  | -3.35845400 | 3.56951100  | C | -0.49855600 | -1.45201600 | -1.96759500 |
| H  | 3.38237300  | -3.44546300 | 2.93555600  | H | 0.08399400  | -2.32051800 | -1.64169800 |
| H  | -0.74944200 | -3.01208700 | 4.08515500  | H | 1.24880700  | -0.31008900 | -3.05332100 |
| H  | 1.30278200  | -4.40310500 | 3.89745900  | H | -1.14230800 | 0.28697600  | -4.30985900 |
| C  | -1.61536600 | 3.53725000  | 1.23385300  | H | -0.70966300 | 1.61331400  | -3.22818500 |
| H  | -1.20010100 | 2.68465300  | 1.79934400  | O | 2.33896900  | -0.25255900 | -3.59729200 |
| C  | -1.96975300 | 4.64094100  | 2.25183700  | S | 3.62373600  | -0.48799900 | -2.77628400 |
| H  | -2.38274700 | 5.53108600  | 1.74514500  | O | 3.48440500  | -0.04788600 | -1.35770800 |
| H  | -2.72816300 | 4.27797600  | 2.96780600  | O | 4.85426100  | -0.12090700 | -3.50478400 |
| H  | -1.08391200 | 4.96462900  | 2.82574000  | C | 3.63992700  | -2.36057100 | -2.66061700 |
| C  | -2.87419700 | 3.02463700  | 0.50462100  | F | 3.54877400  | -2.92757600 | -3.87614000 |
| H  | -3.40368800 | 3.84345600  | -0.01398500 | F | 4.77318200  | -2.78579500 | -2.06514100 |
| H  | -2.62331000 | 2.25618200  | -0.24574900 | F | 2.58529600  | -2.78923700 | -1.90860000 |
| H  | -3.57929200 | 2.58260300  | 1.23054600  |   |             |             |             |
| C  | -1.11774900 | -0.40718200 | 3.38261800  |   |             |             |             |
